# Supplementary material for: Genomic Insights into Cultivated Mexican Vanilla planifolia Reveal High Levels of Heterozygosity Stemming from Hybridization
Source: MDPI journal article supplement (doi:10.3390/plants11162090), 2022-08-11

# GenomeScope Profile

len:603,581,731bp uniq:69.1%  
aa:97.3% ab:2.74%  
kcov:32.3 err:0.56% dup:2.04 k:21 p:2

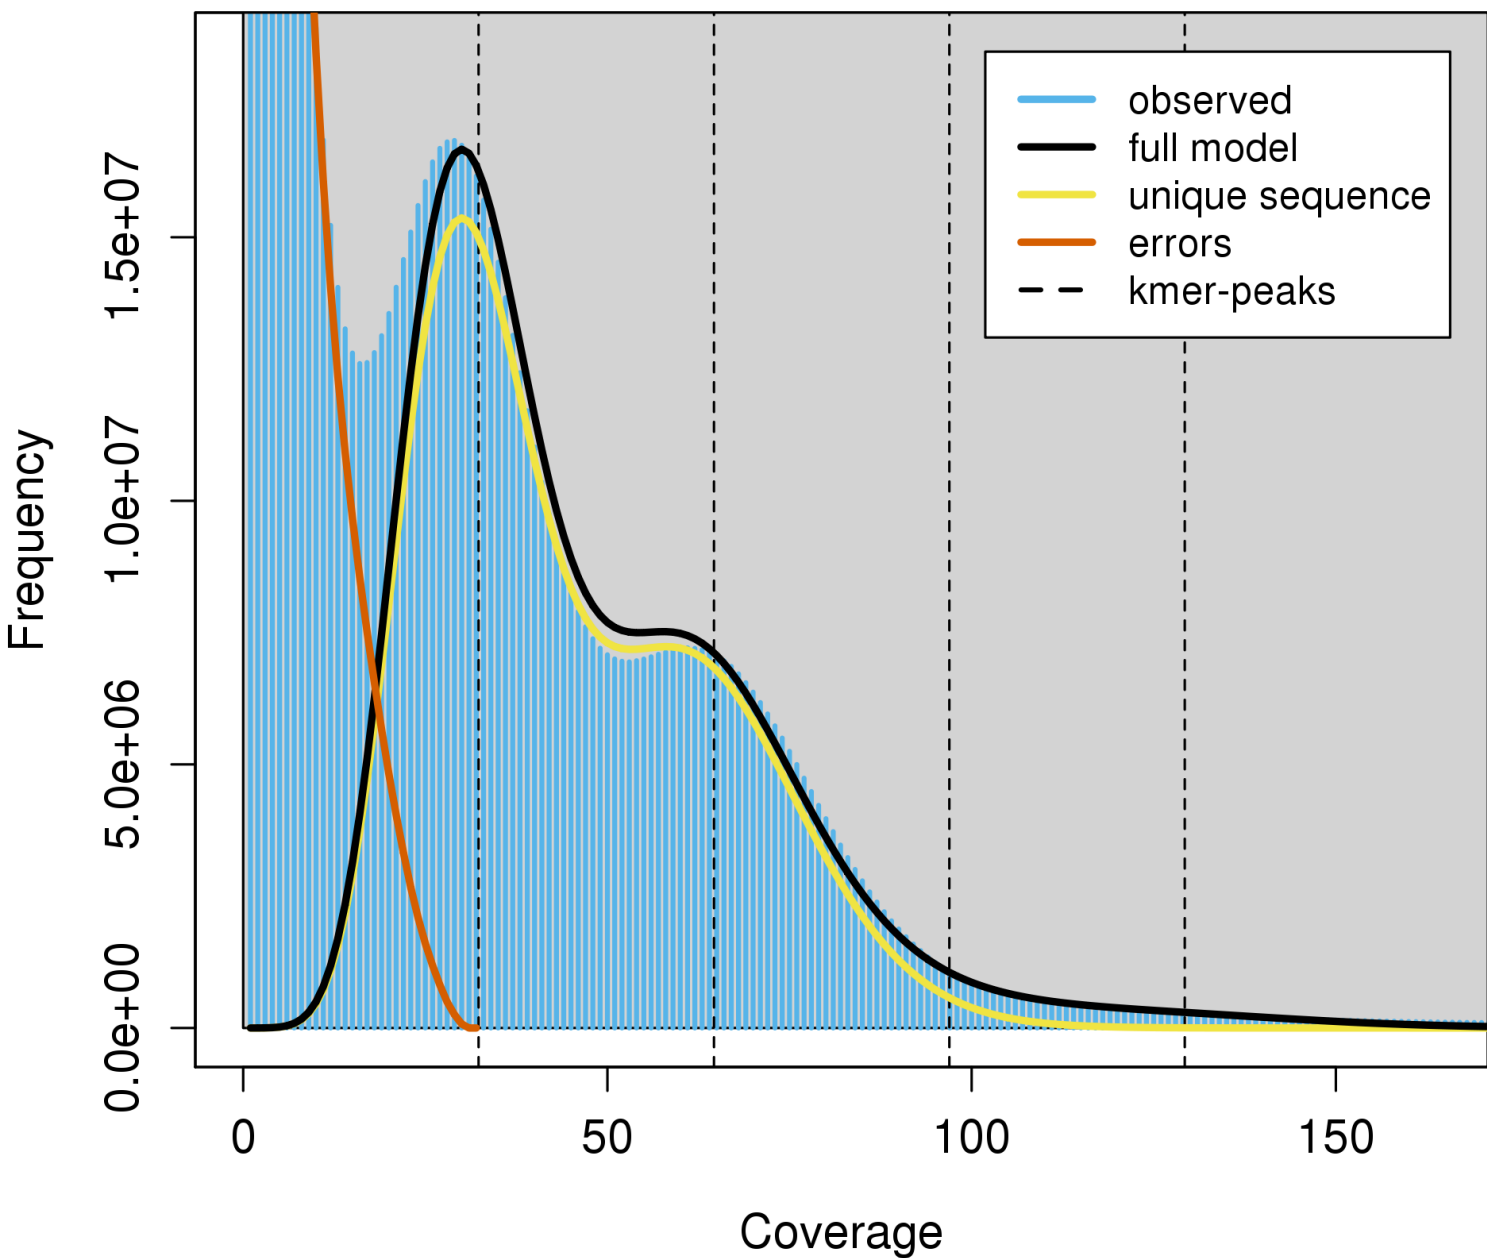

# GenomeScope Profile

len:598,222,989bp uniq:70.3%  
aa:97.3% ab:2.67%  
kcov:32.6 err:0.563% dup:1.84 k:21 p:2

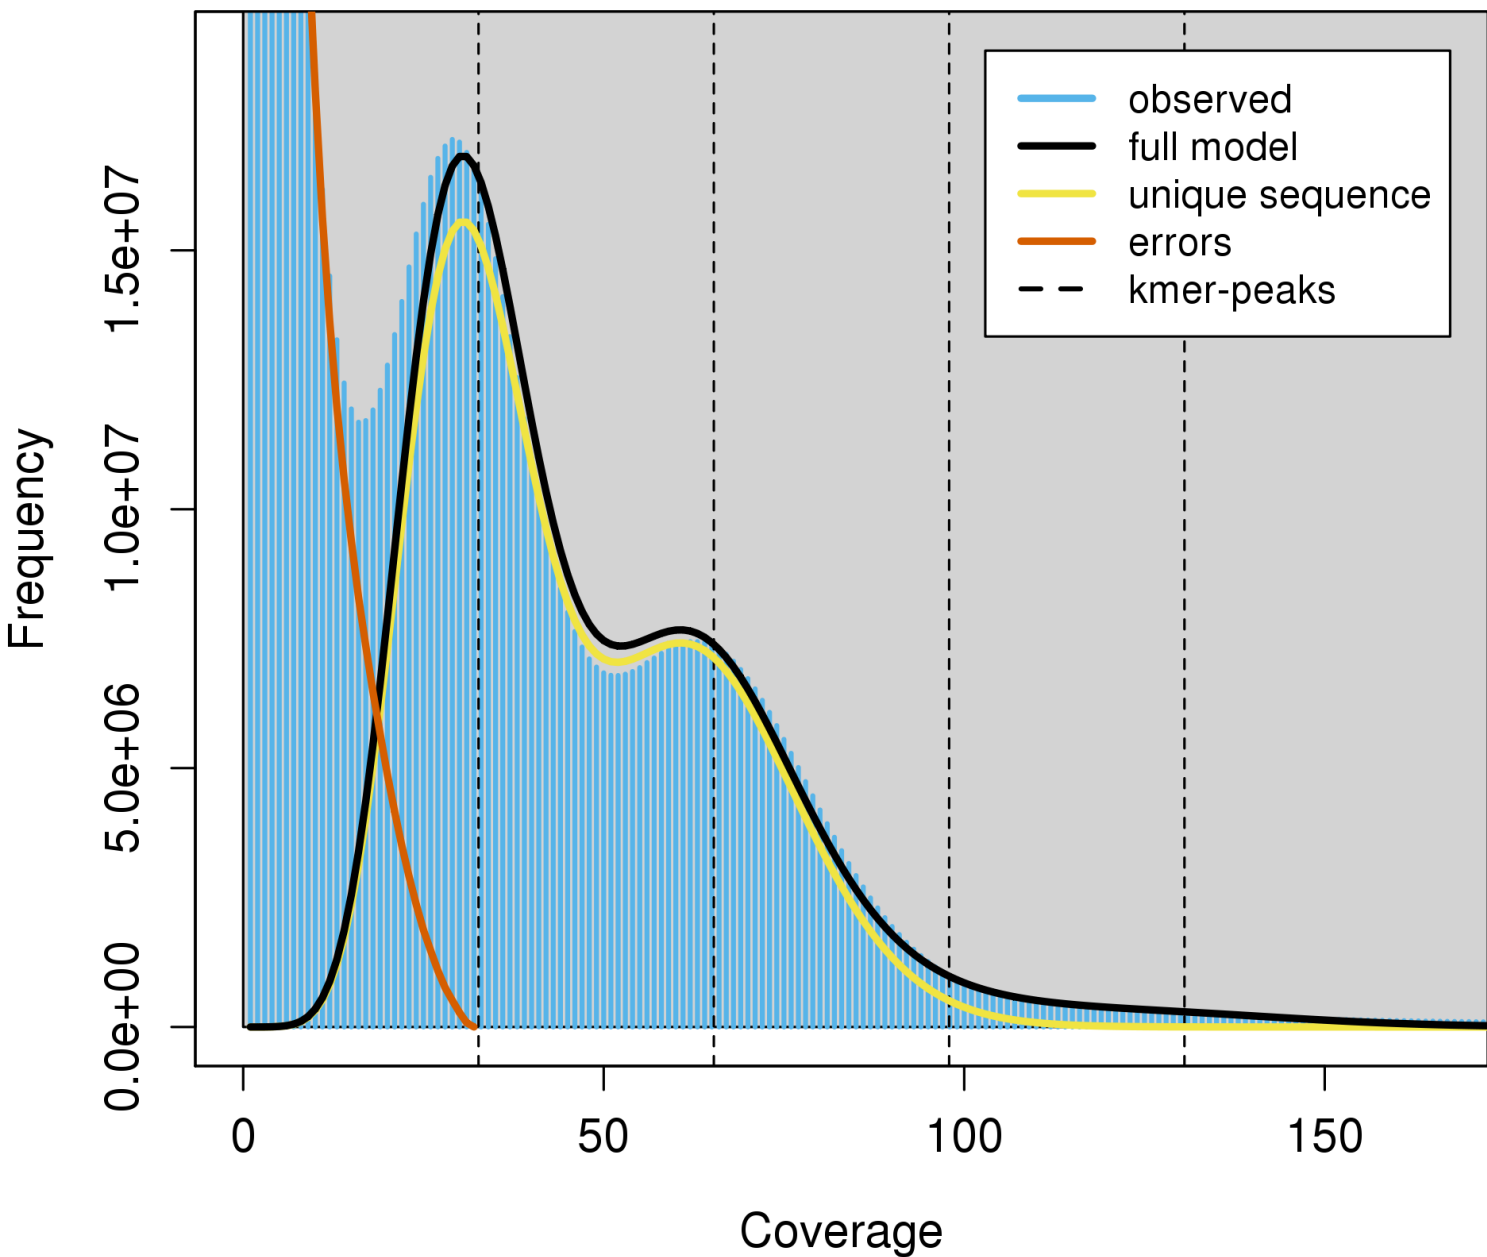

# GenomeScope Profile

len:551,533,118bp uniq:71.6%  
aa:97.3% ab:2.66%  
kcov:34.7 err:0.645% dup:1.94 k:21 p:2

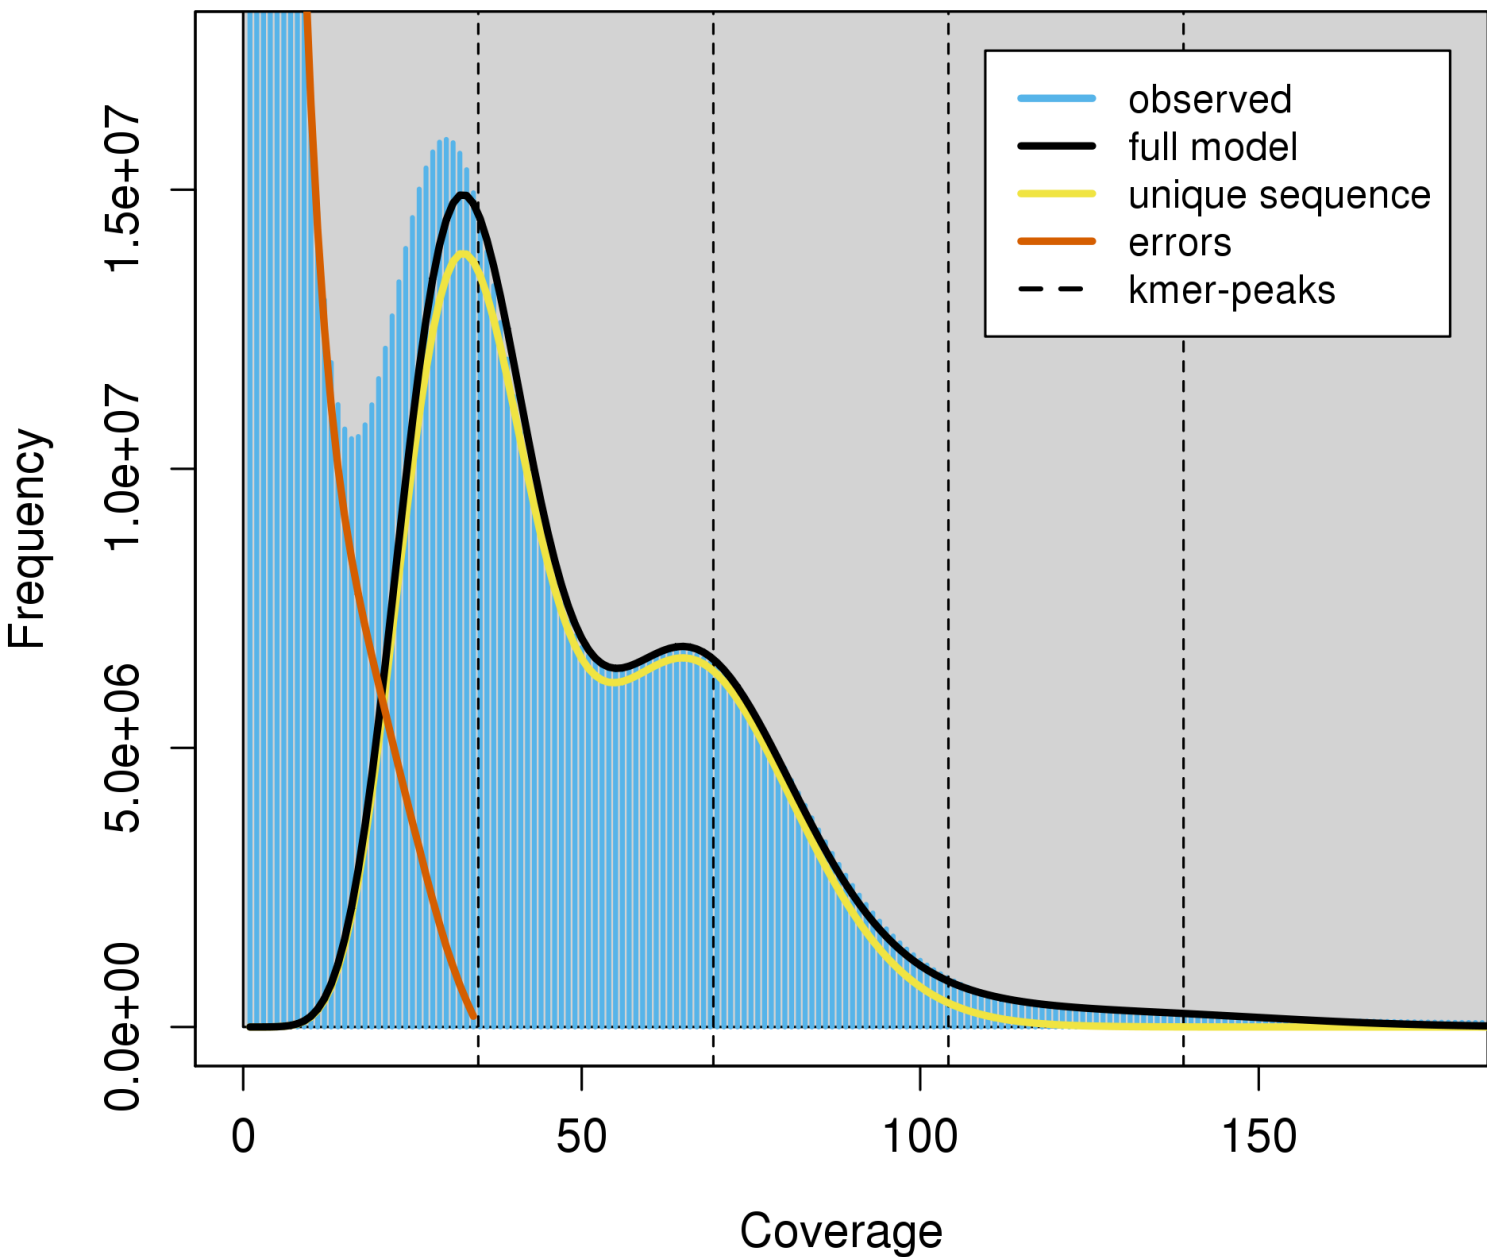

# GenomeScope Profile

len:538,634,137bp uniq:74.7%  
aa:97.5% ab:2.52%  
kcov:32.4 err:0.629% dup:1.46 k:21 p:2

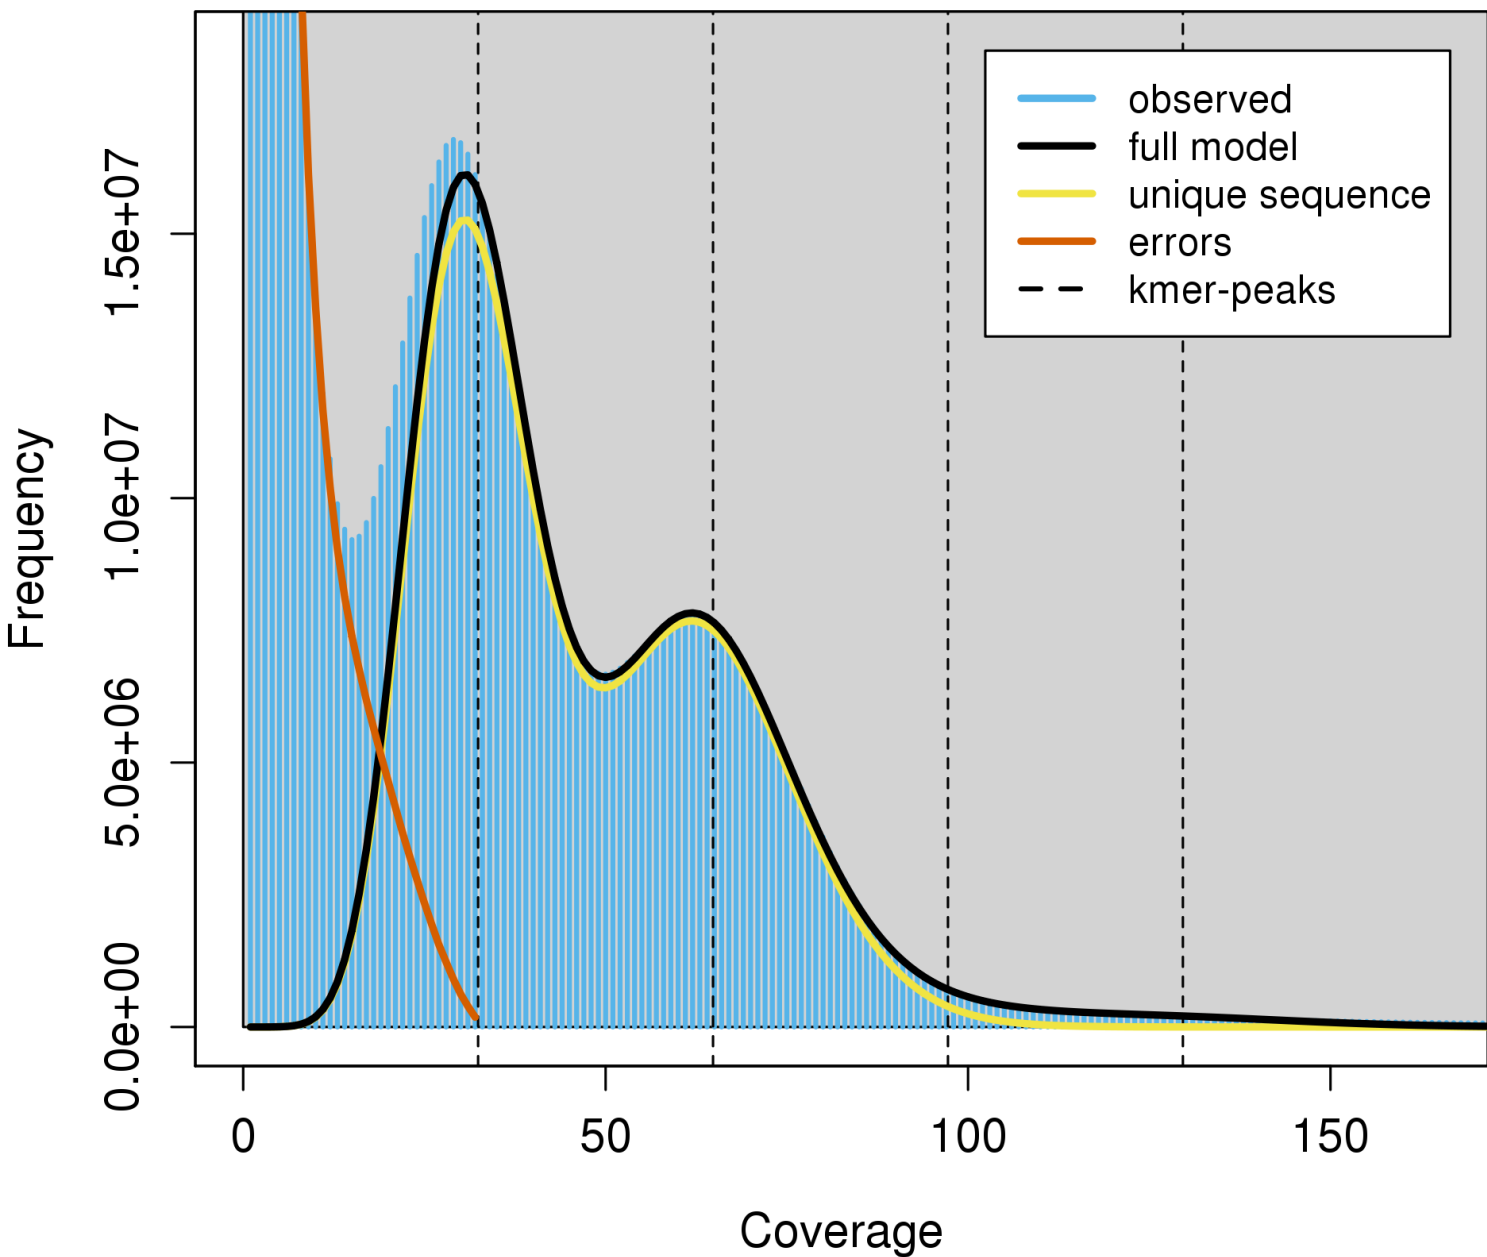

# GenomeScope Profile

len:542,383,163bp uniq:74.4%  
aa:97.4% ab:2.56%  
kcov:33.7 err:0.76% dup:1.66 k:21 p:2

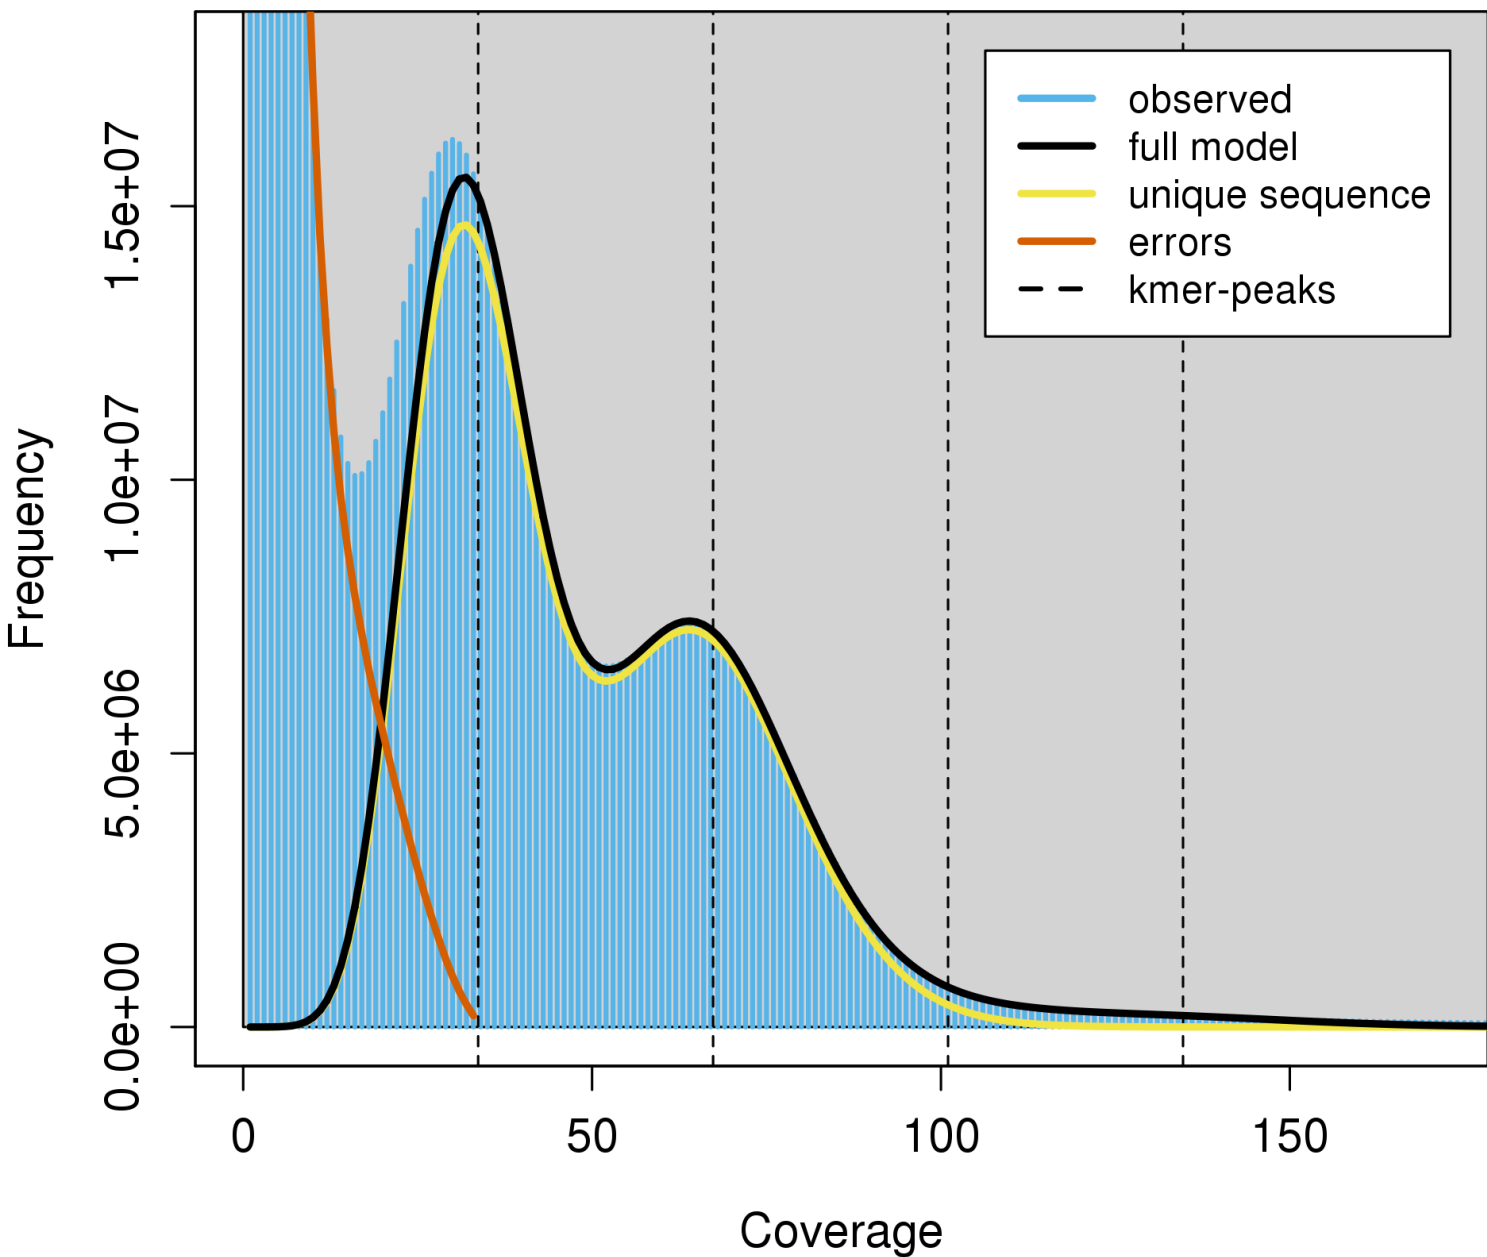

# GenomeScope Profile

len:556,960,367bp uniq:72.7%  
aa:97.4% ab:2.57%  
kcov:31.7 err:0.67% dup:1.54 k:21 p:2

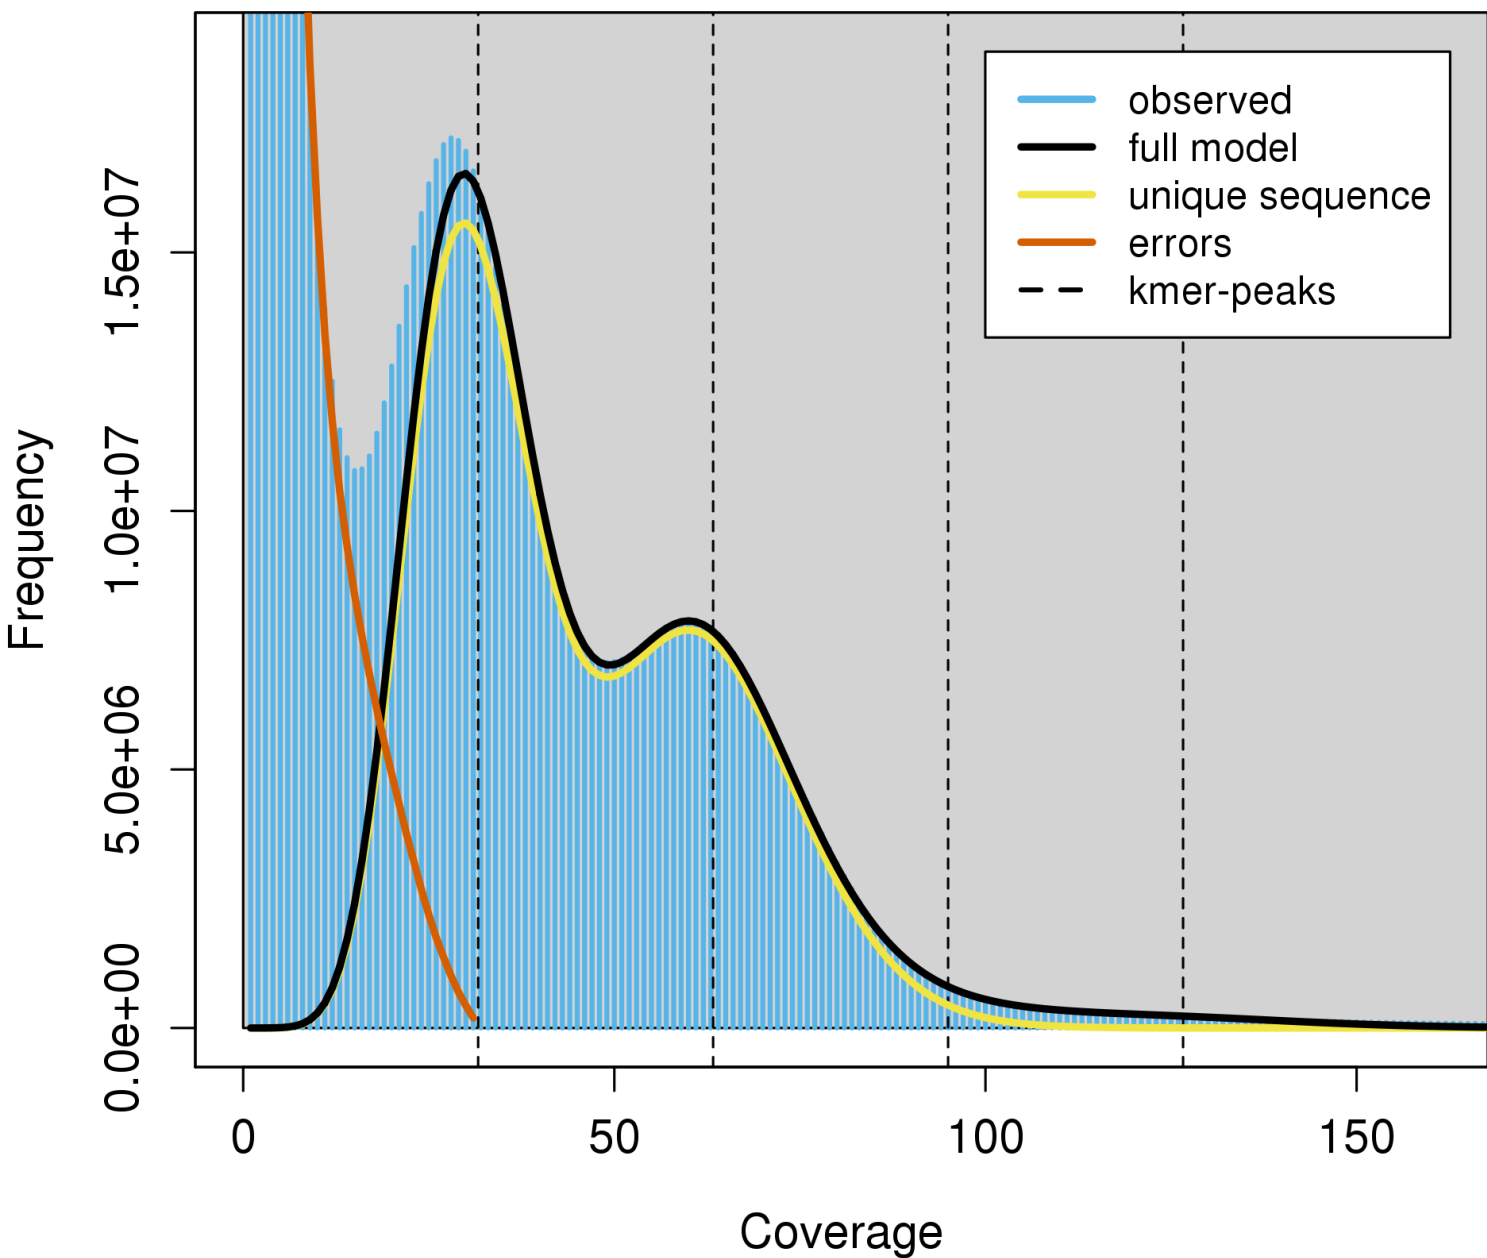

# GenomeScope Profile

len:591,646,983bp uniq:68.7%  
aa:97.4% ab:2.61%  
kcov:32.5 err:0.63% dup:1.78 k:21 p:2

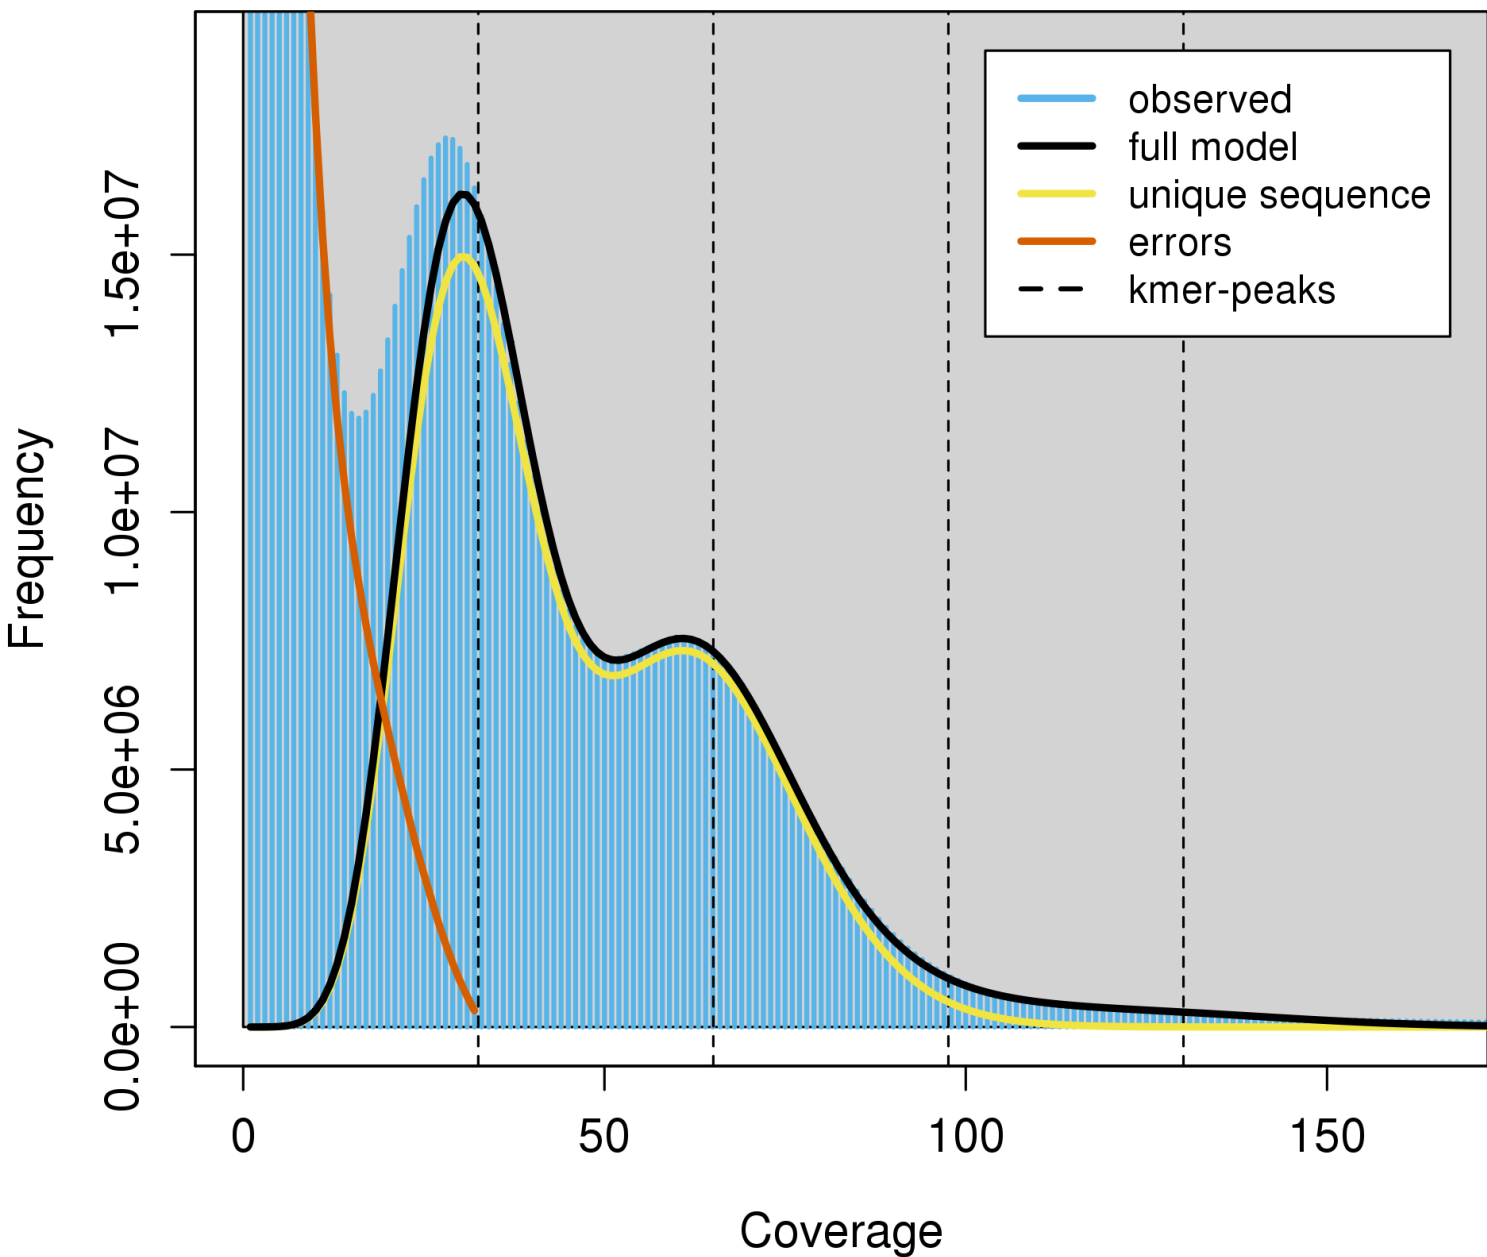

# GenomeScope Profile

len:587,111,251bp uniq:70.1%  
aa:97.5% ab:2.52%  
kcov:28.2 err:0.652% dup:1.27 k:21 p:2

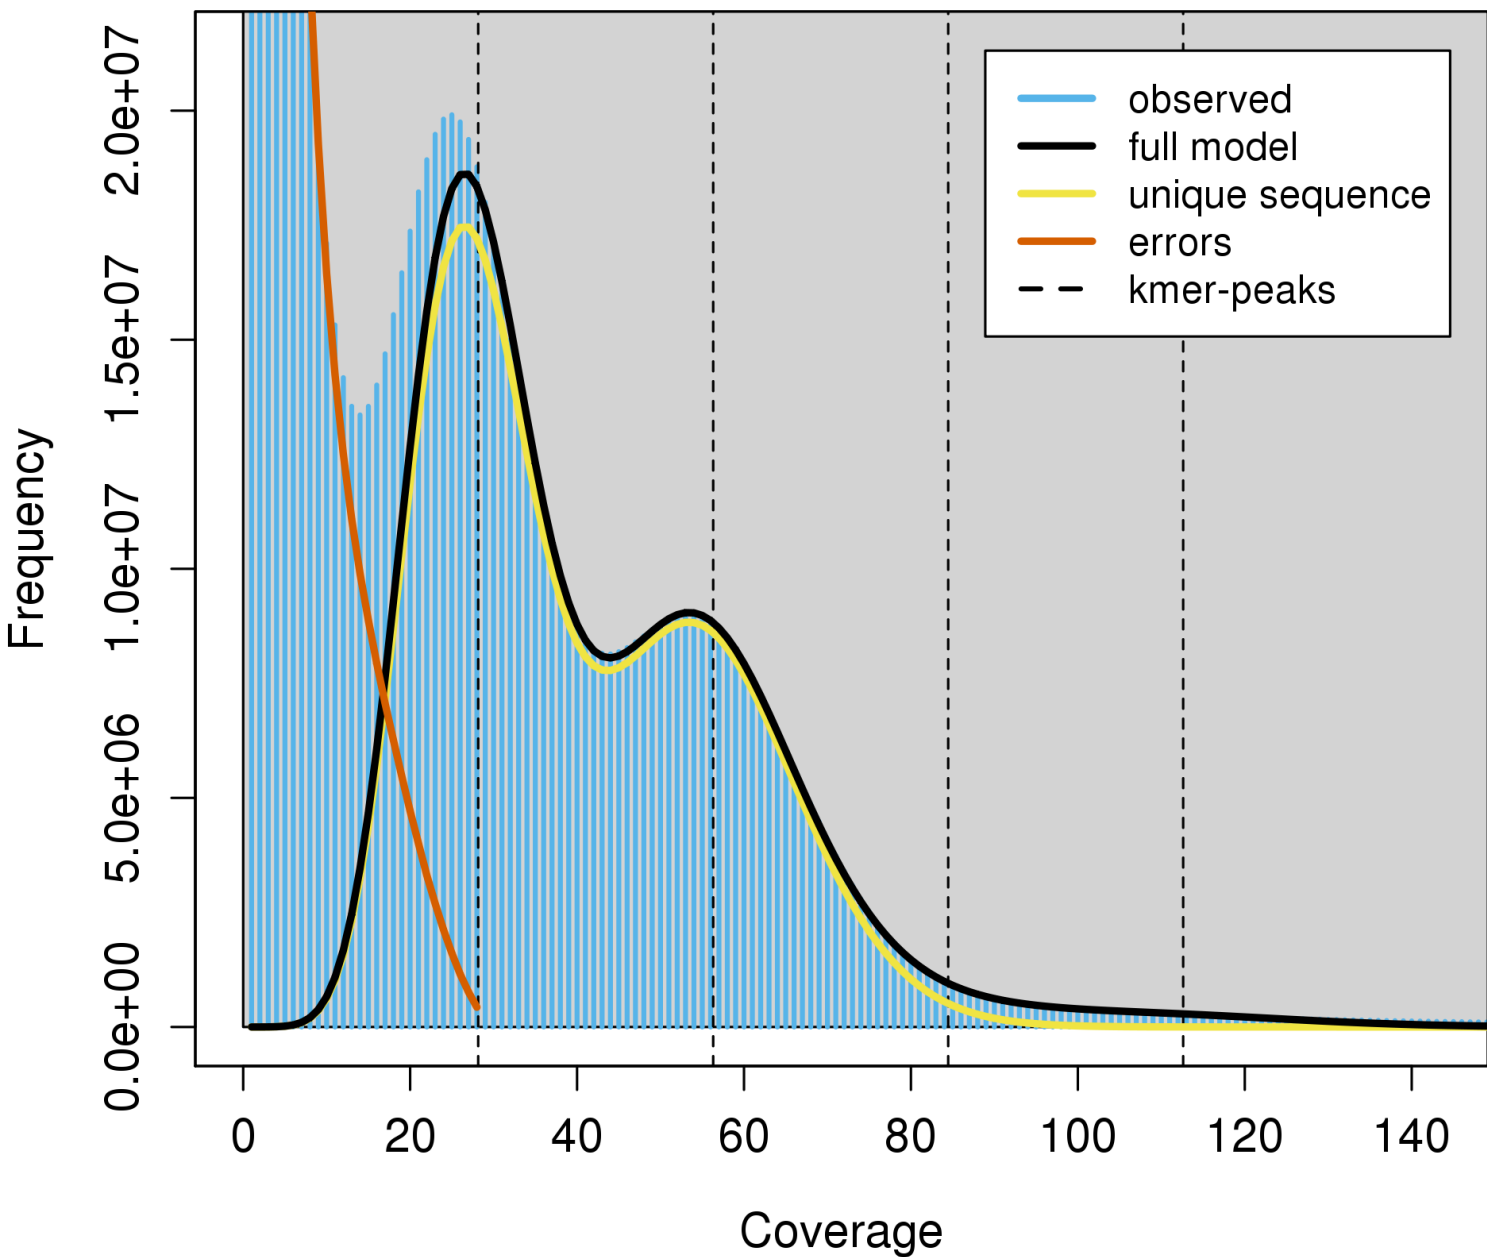



# GenomeScope Profile

len:536,624,417bp uniq:71.6%

aa:97.2% ab:2.77%

kcov:40.9 err:0.605% dup:2.64 k:21 p:2

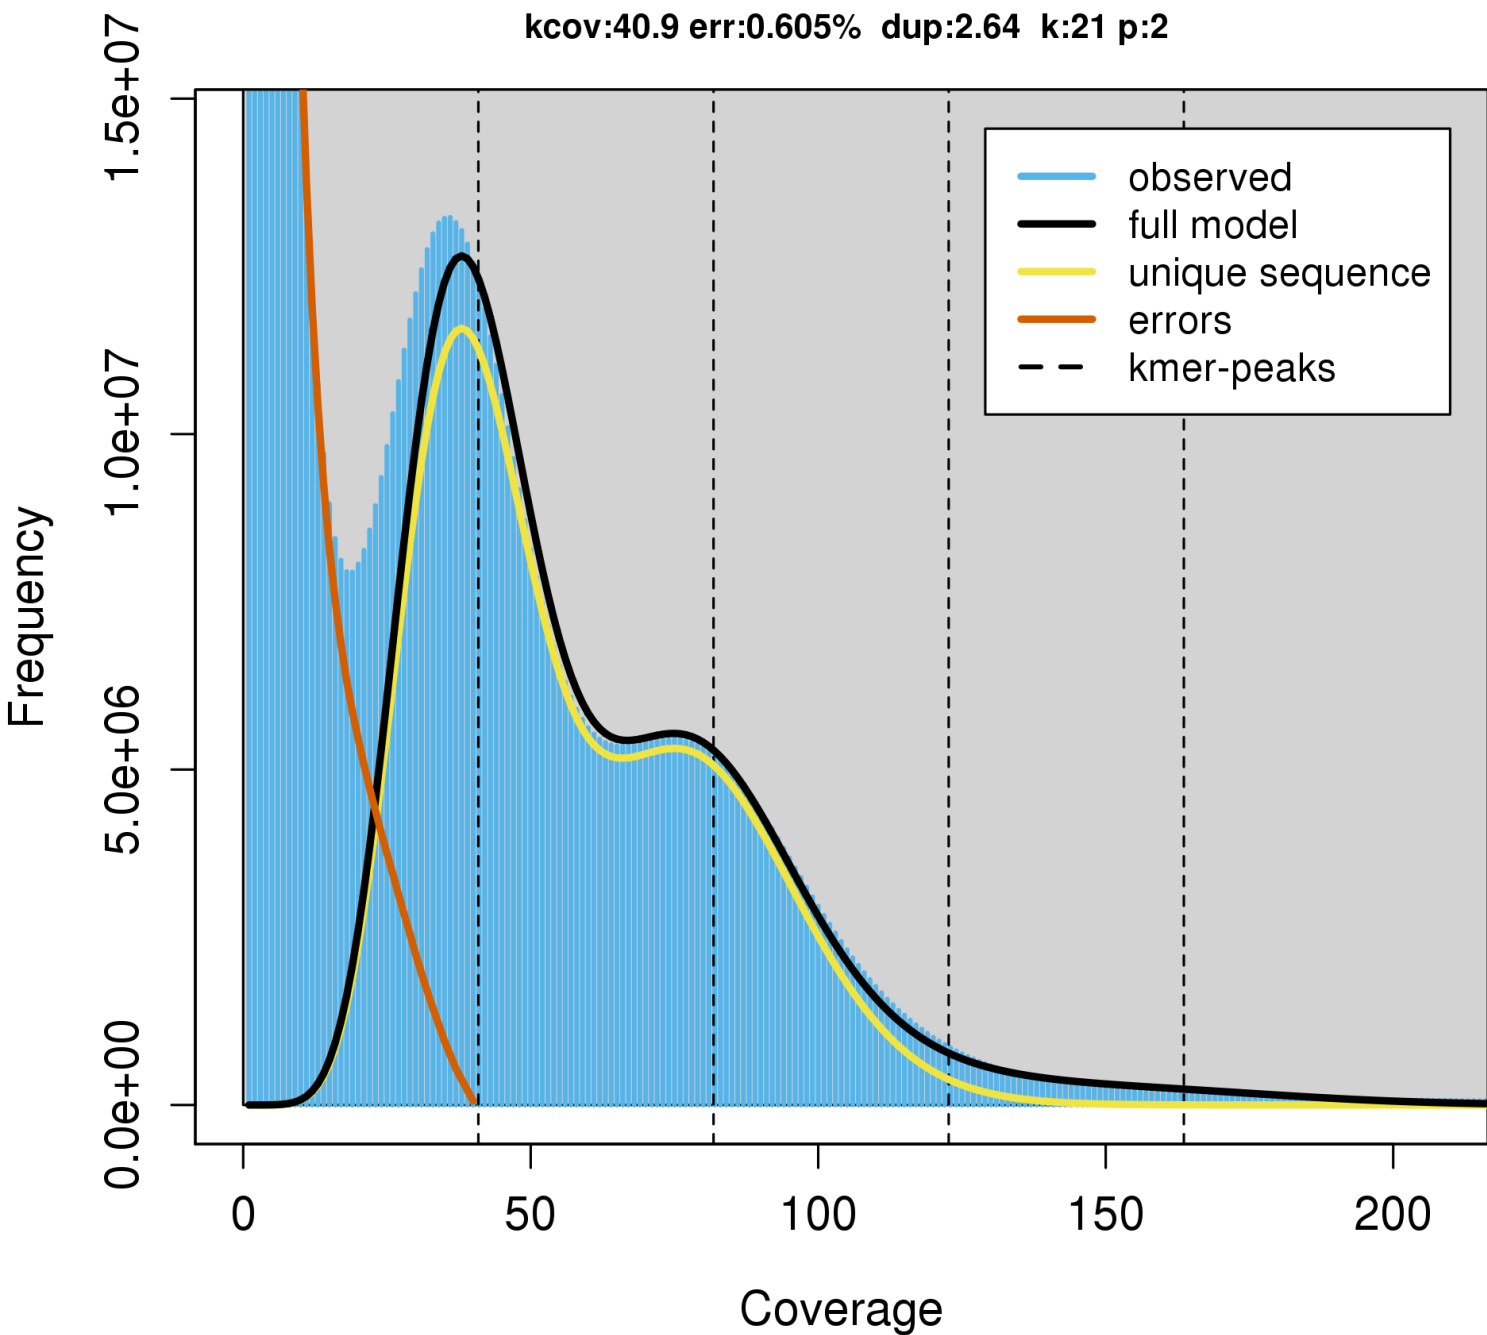

# GenomeScope Profile

len:541,351,628bp uniq:73.6%

aa:97.4% ab:2.62%

kcov:39.3 err:0.685% dup:1.92 k:21 p:2

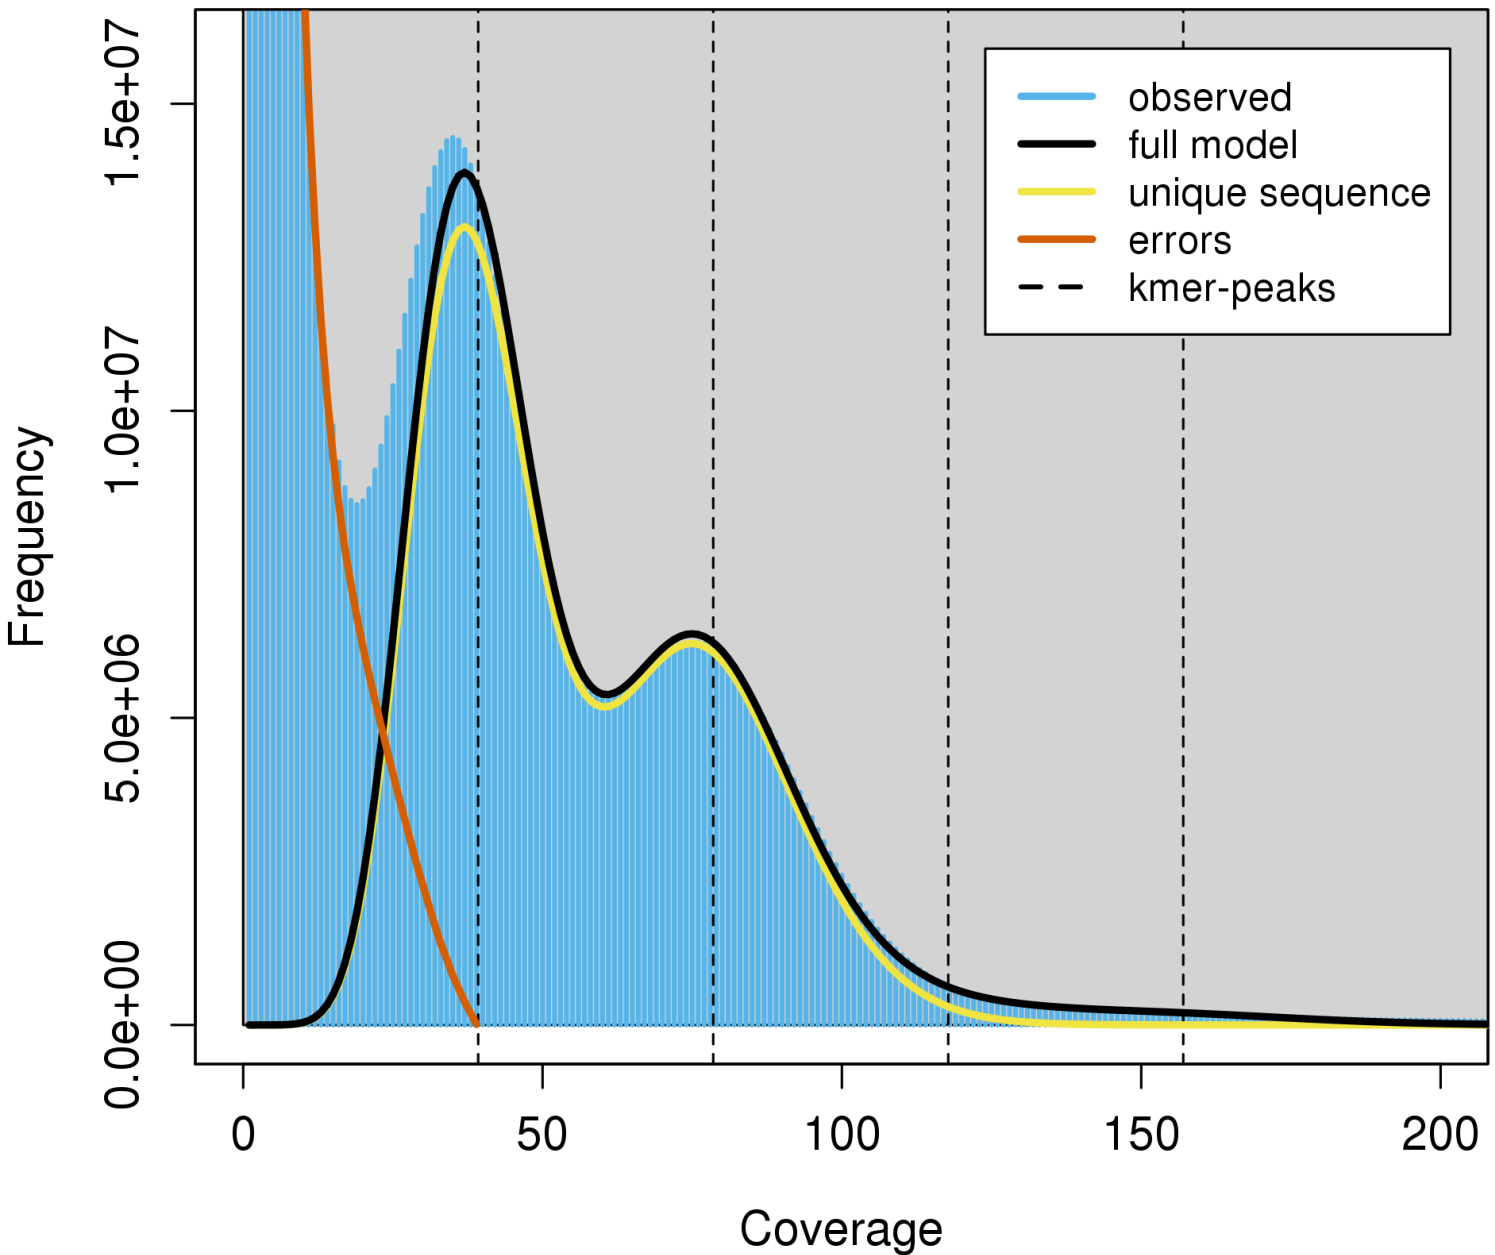

# GenomeScope Profile

len:513,000,379bp uniq:73%  
aa:97.2% ab:2.79%  
kcov:38.5 err:0.637% dup:2.45 k:21 p:2

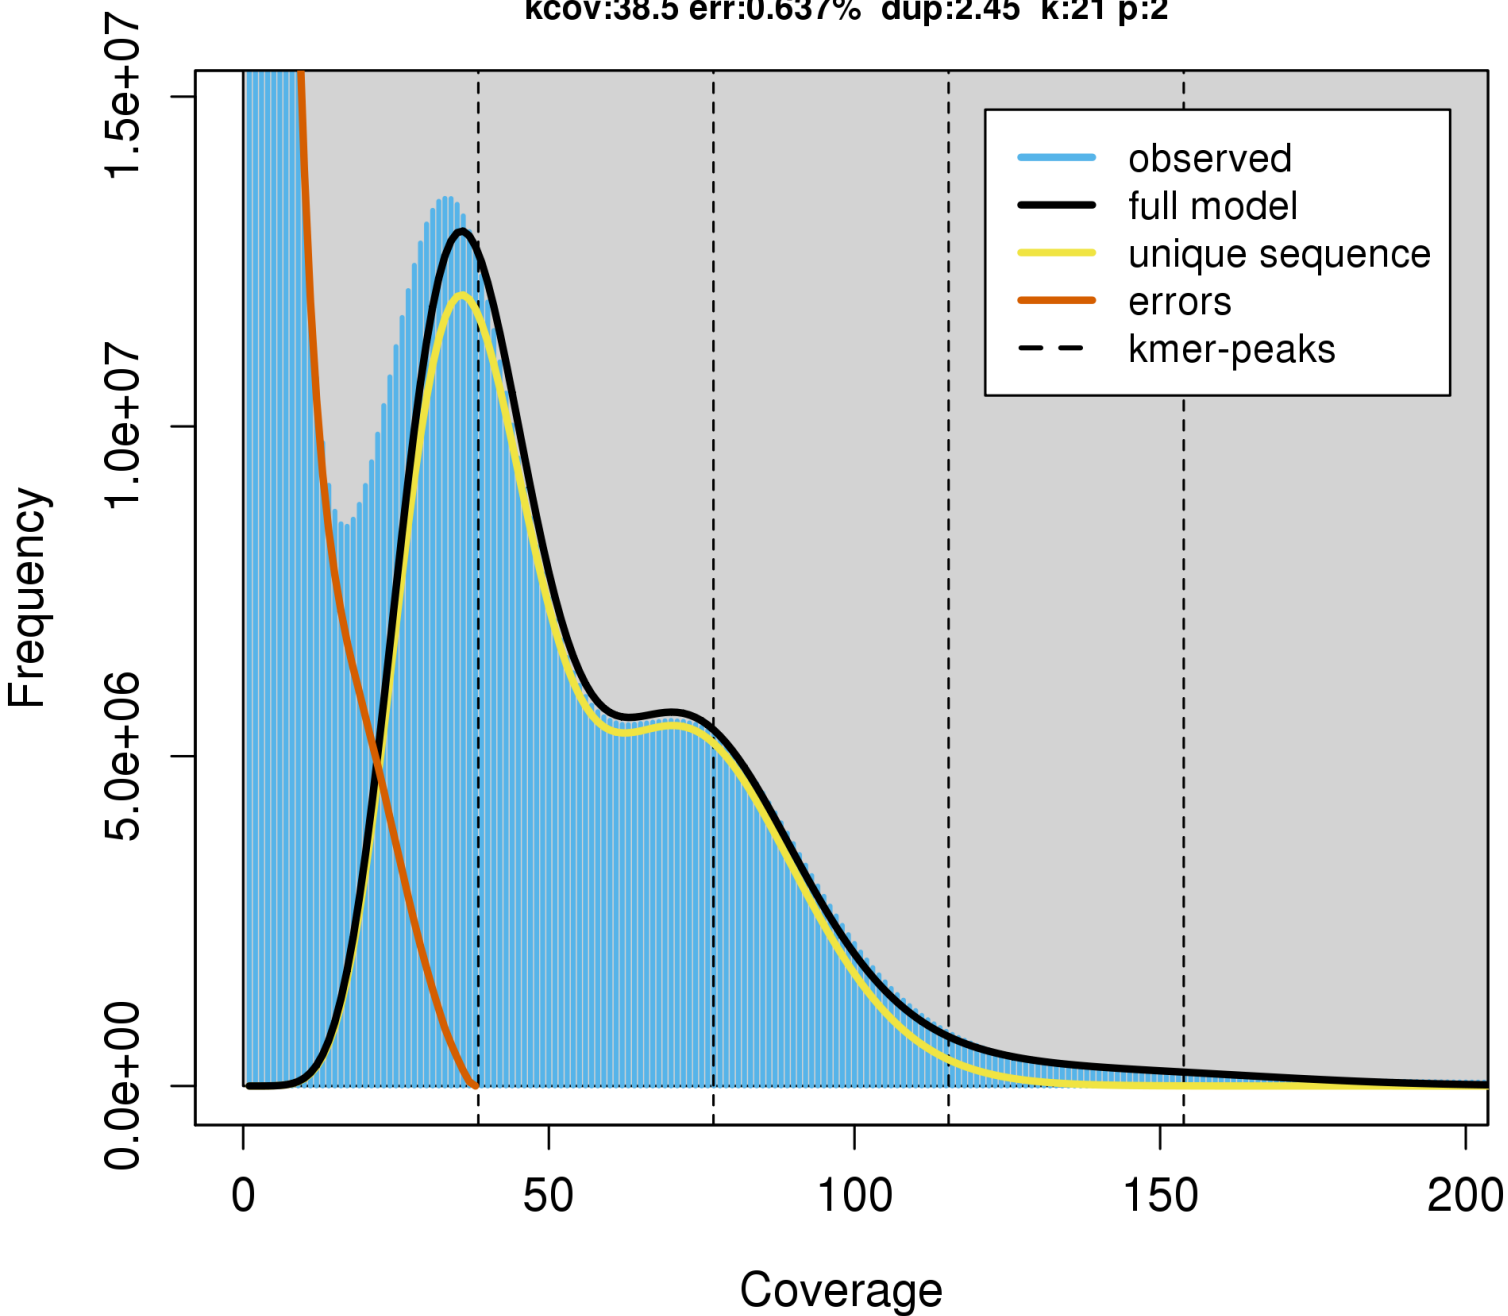

# GenomeScope Profile

len:613,577,529bp uniq:65.5%  
aa:97.4% ab:2.57%  
kcov:16 err:0.616% dup:0.924 k:21 p:2

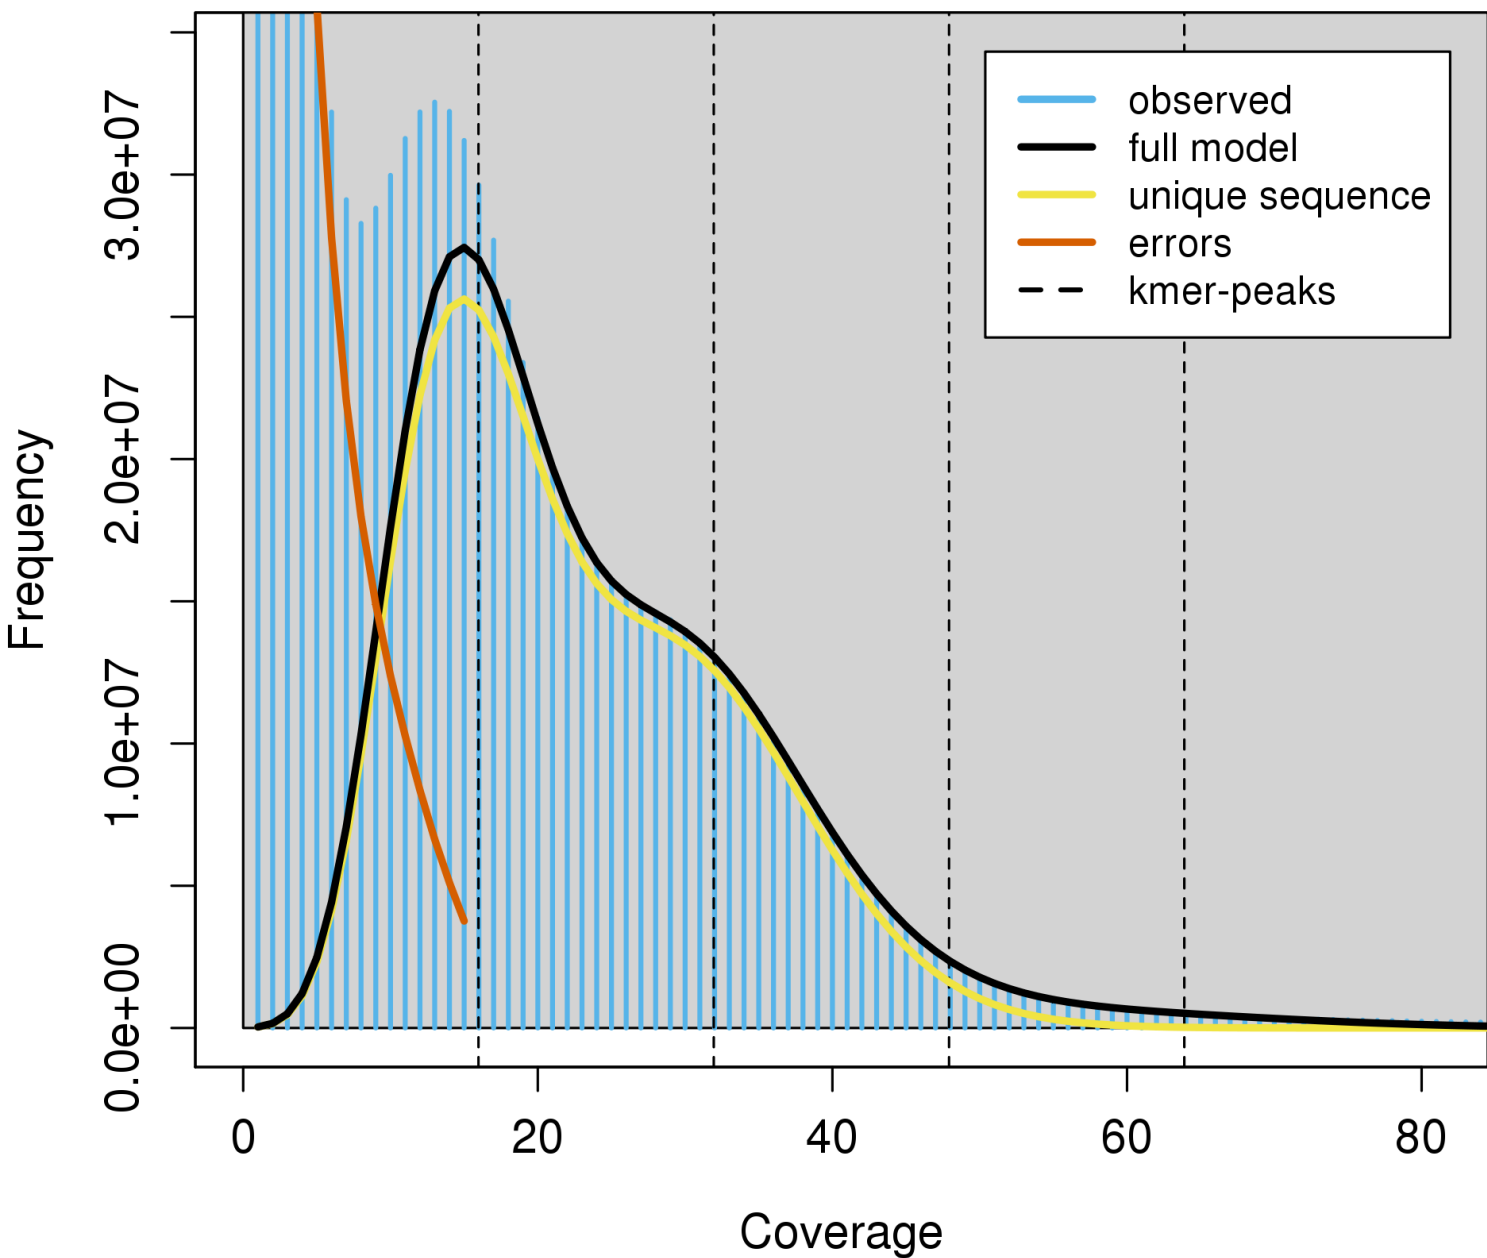

# GenomeScope Profile

len:567,156,101bp uniq:77.9%

aa:99.6% ab:0.403%

kcov:34.1 err:0.511% dup:2.4 k:21 p:2

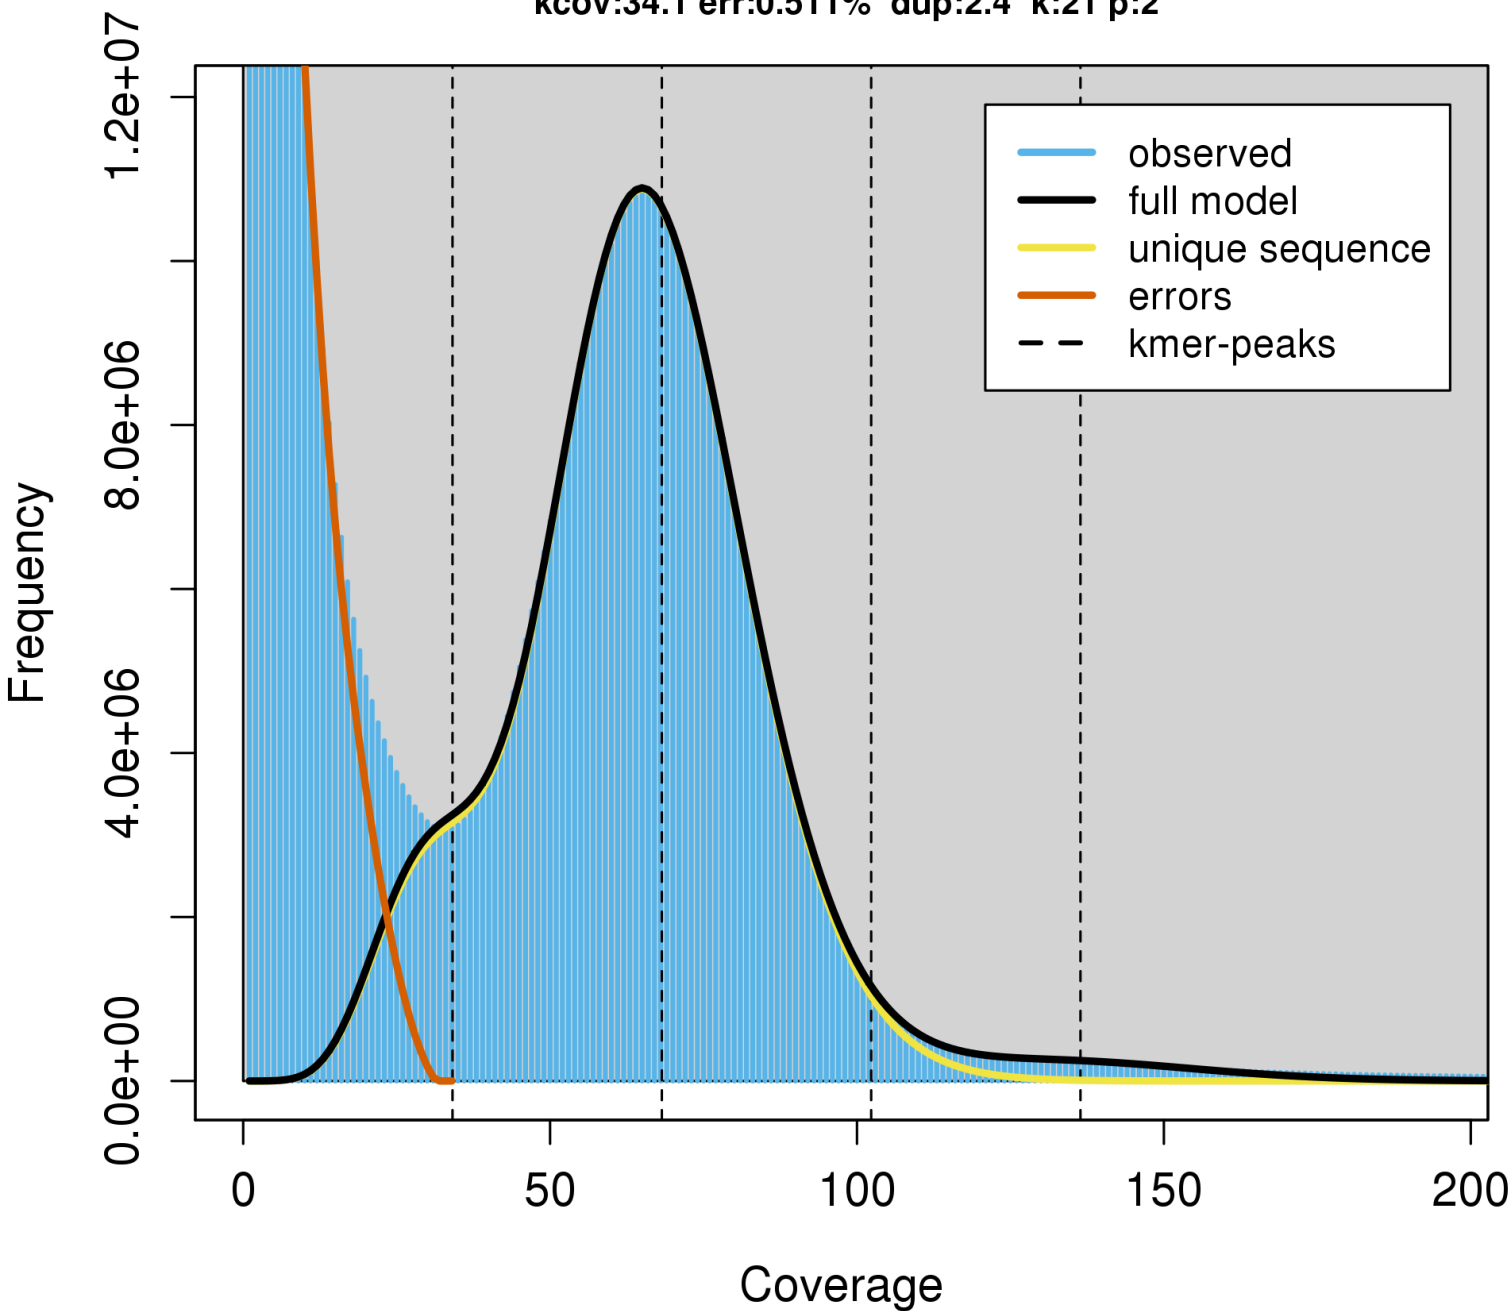

# GenomeScope Profile

len:532,606,947bp uniq:71.4%

aa:97.1% ab:2.85%

kcov:38.9 err:0.679% dup:2.79 k:21 p:2

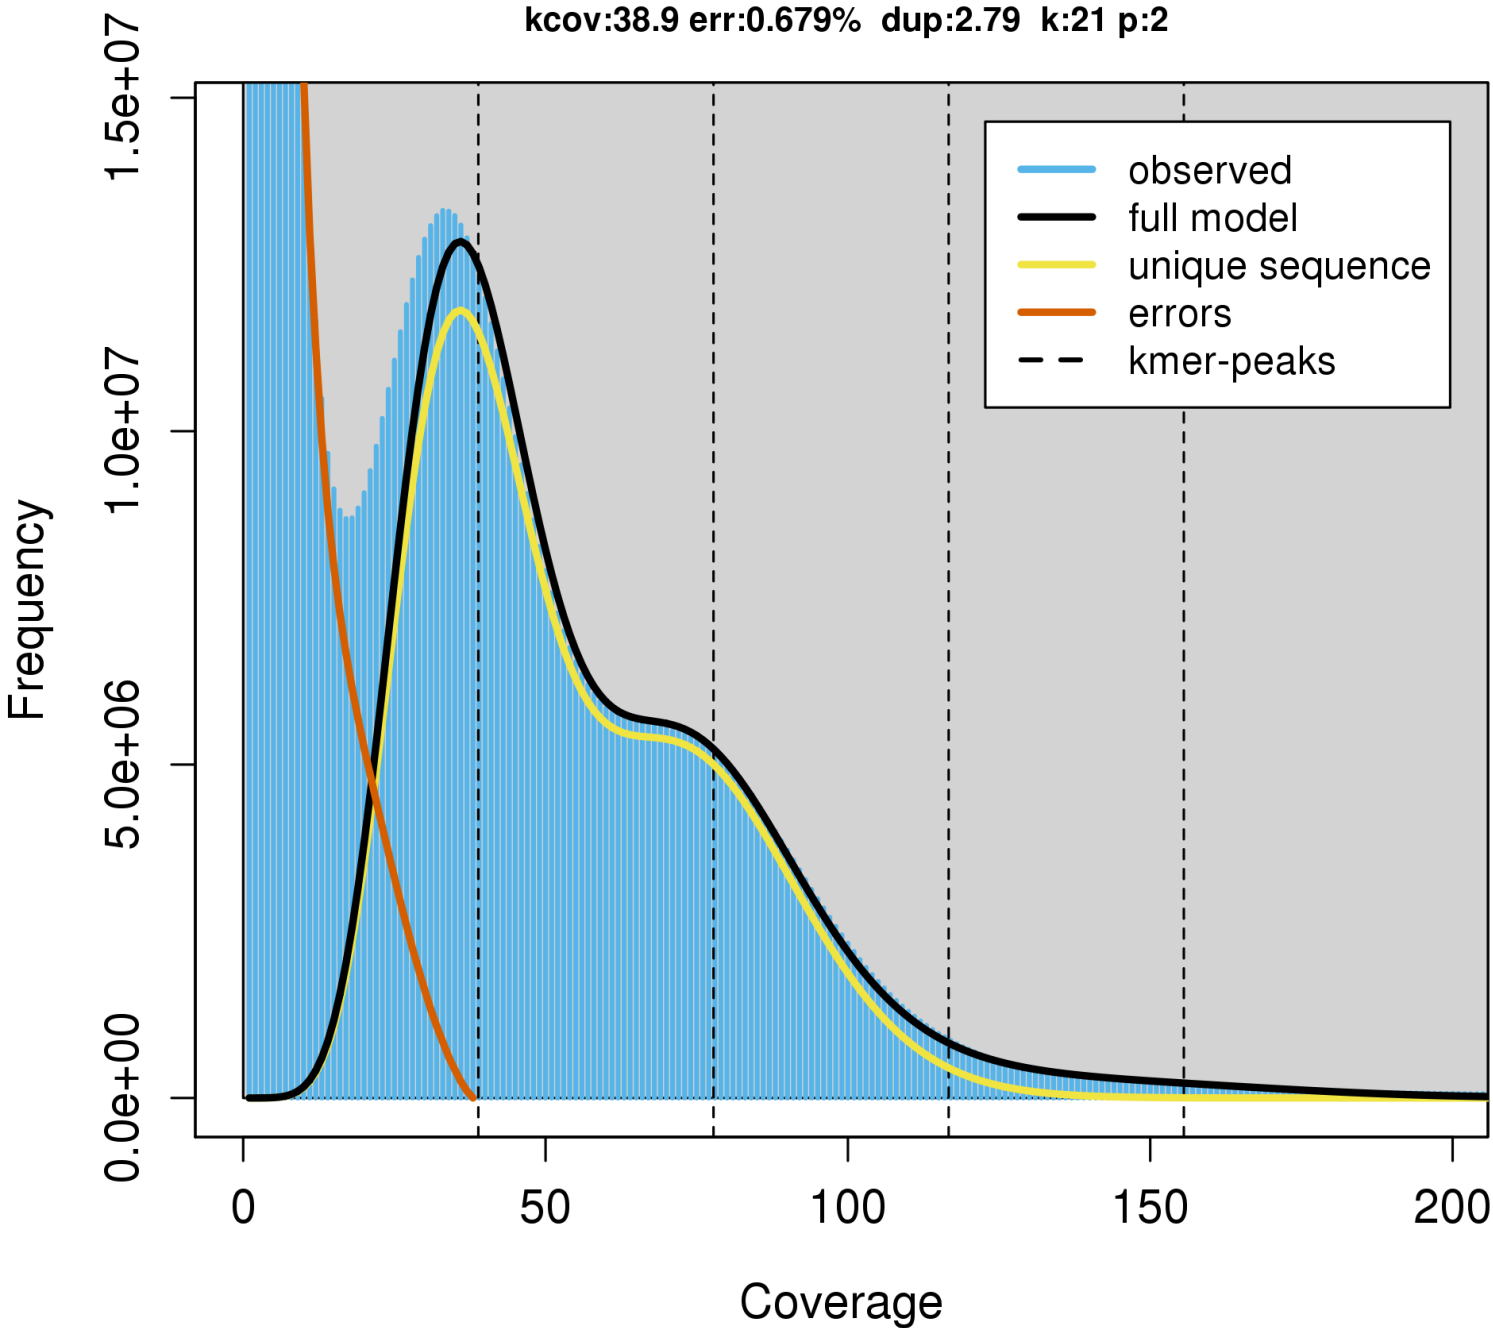

# GenomeScope Profile

len:543,299,643bp uniq:74.5%  
aa:97.5% ab:2.53%  
kcov:39.2 err:0.615% dup:1.62 k:21 p:2

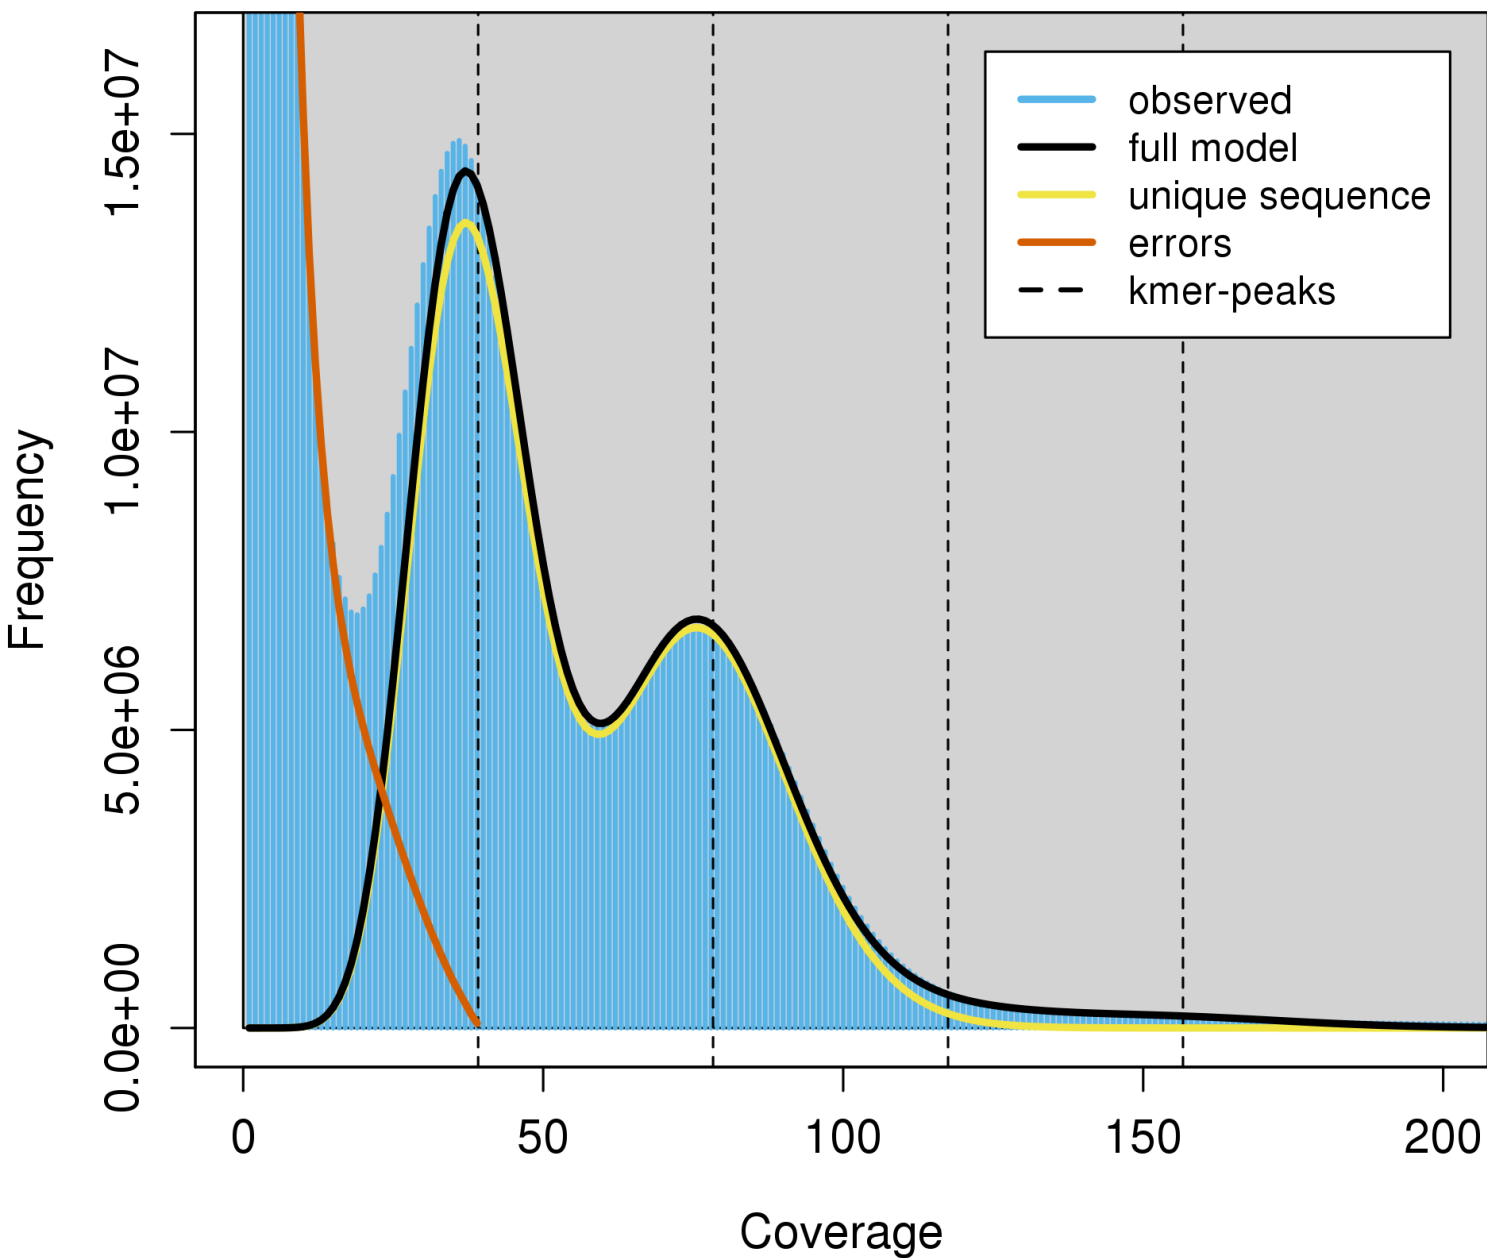

Supplement: s1 [file s1]
