# Supplementary material for: Genomic Insights into Cultivated Mexican Vanilla planifolia Reveal High Levels of Heterozygosity Stemming from Hybridization
Source: MDPI journal article supplement (doi:10.3390/plants11162090), 2022-08-11
Supplement: s1 [file s1]

# MEX12

proposed diploid

log kmers pairs

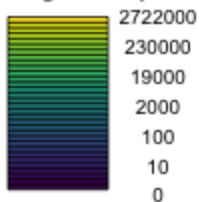

Total coverage of the kmer pair: A + B

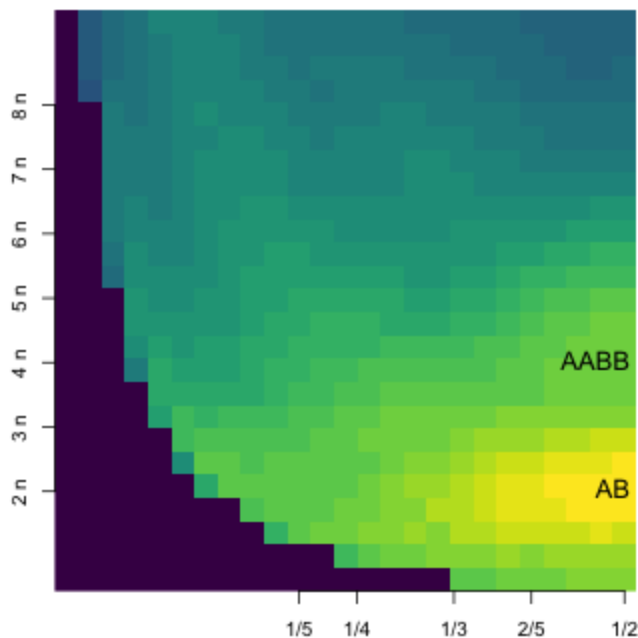

AB 0.96  
AABB 0.04

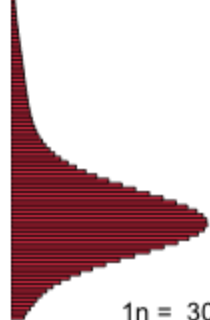

Normalized minor kmer coverage: B / (A + B)

MEX13

proposed diploid

log kmers pairs

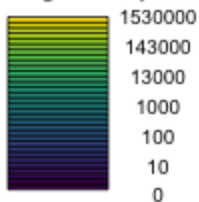

Total coverage of the kmer pair:  $A + B$

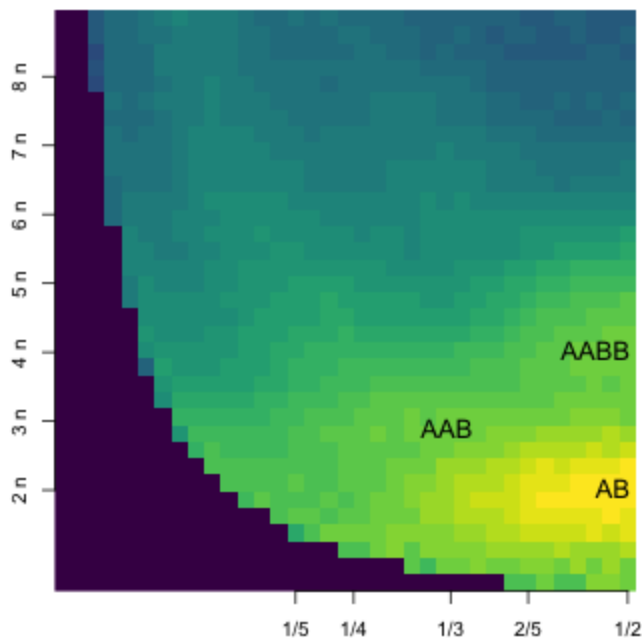

AB 0.93  
AABB 0.05  
AAB 0.02

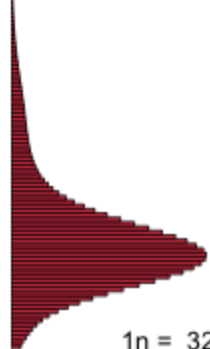

Normalized minor kmer coverage:  $B / (A + B)$

# MEX14

proposed diploid

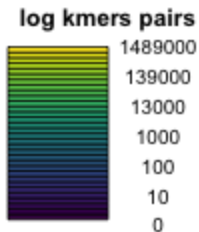

AB 0.96  
AABB 0.04

Total coverage of the kmer pair:  $A + B$

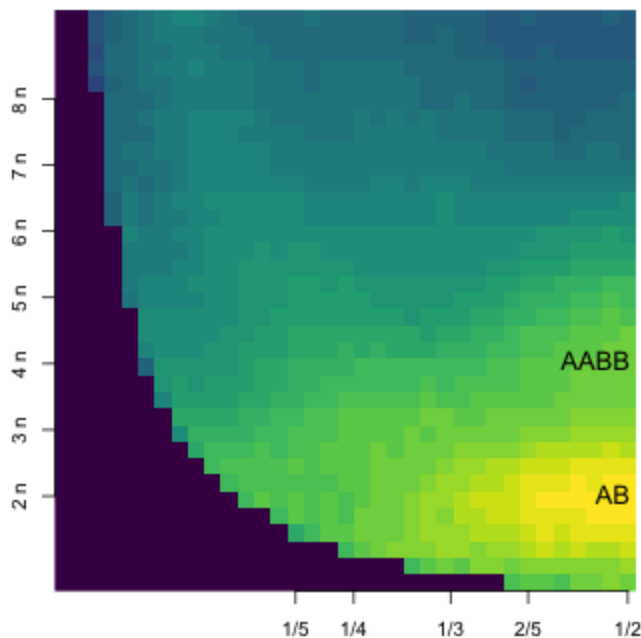

Normalized minor kmer coverage:  $B / (A + B)$

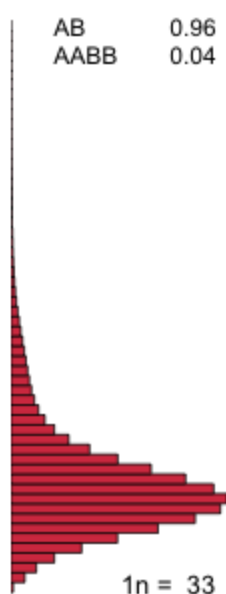

MEX19

proposed diploid

log kmers pairs

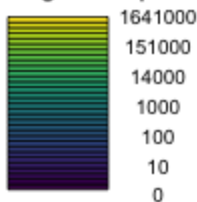

AB 0.95  
AABB 0.05

Total coverage of the kmer pair:  $A + B$

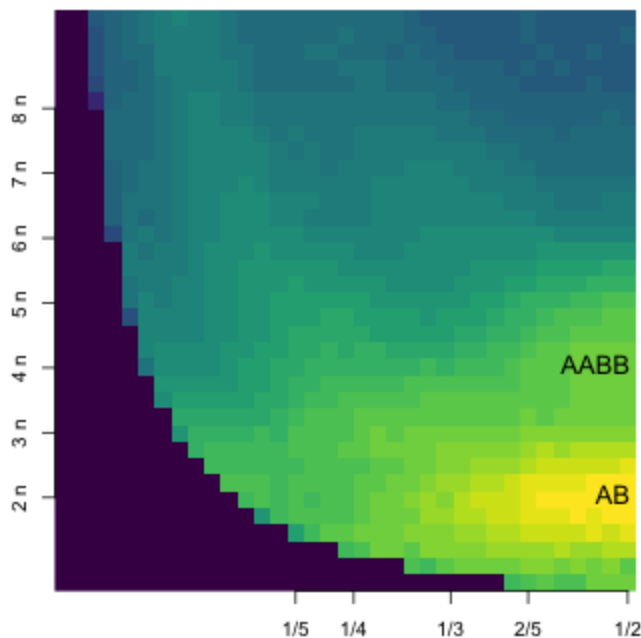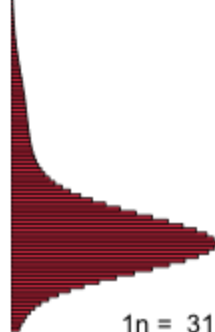

Normalized minor kmer coverage:  $B / (A + B)$

MEX20

proposed diploid

log kmers pairs

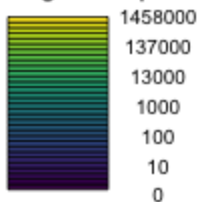

AB 0.96  
AABB 0.04

Total coverage of the kmer pair:  $A + B$

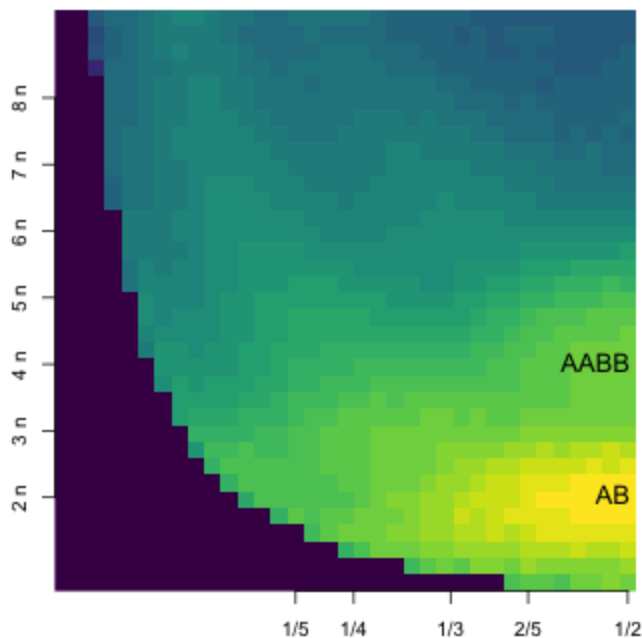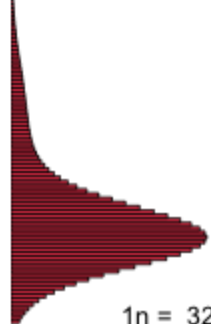

Normalized minor kmer coverage:  $B / (A + B)$

MEX26

proposed diploid

log kmers pairs

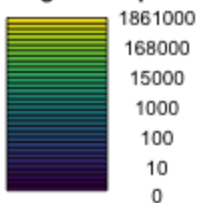

AB 0.97  
AAABB 0.03

Total coverage of the kmer pair:  $A + B$

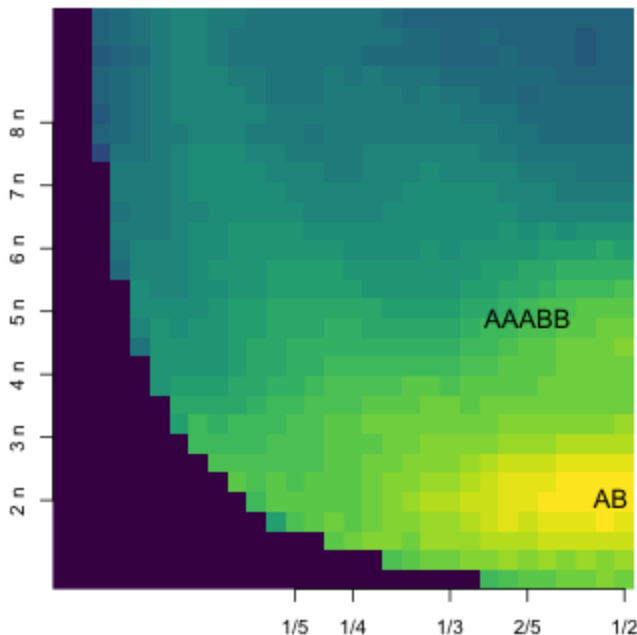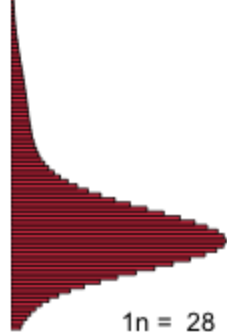

Normalized minor kmer coverage:  $B / (A + B)$

MEX31

proposed diploid

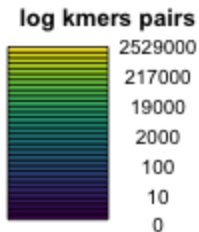

Total coverage of the kmer pair:  $A + B$

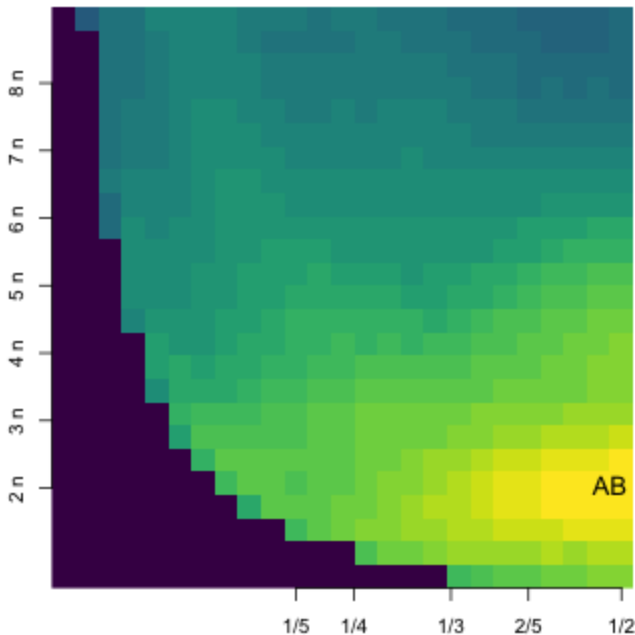

AB

1

$1n = 31$

MEX36

proposed diploid

log kmers pairs

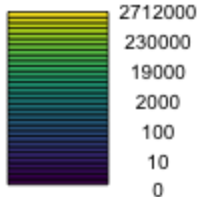

AB 0.96  
AABB 0.04

Total coverage of the kmer pair:  $A + B$

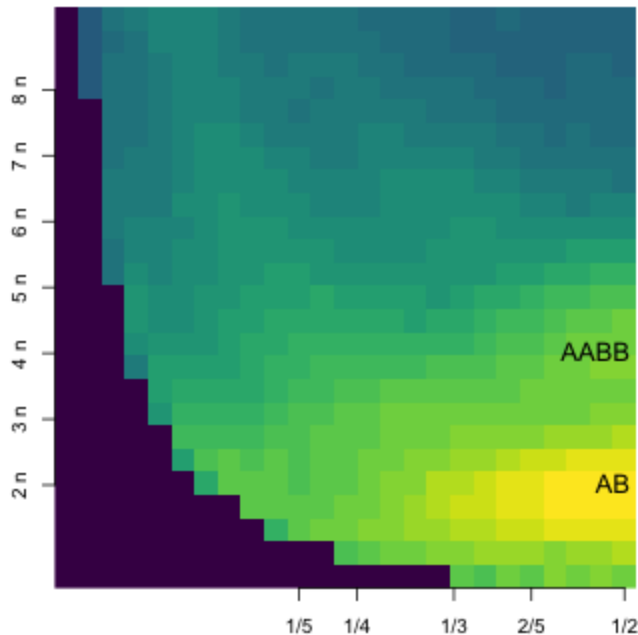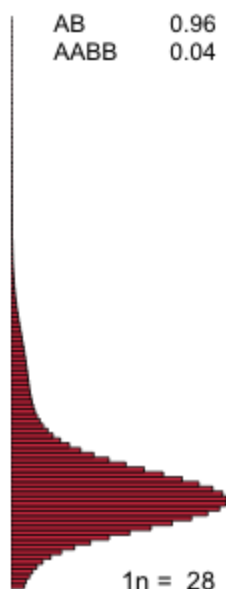

Normalized minor kmer coverage:  $B / (A + B)$



MEX41

proposed diploid

log kmers pairs

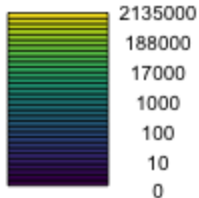

Total coverage of the kmer pair:  $A + B$

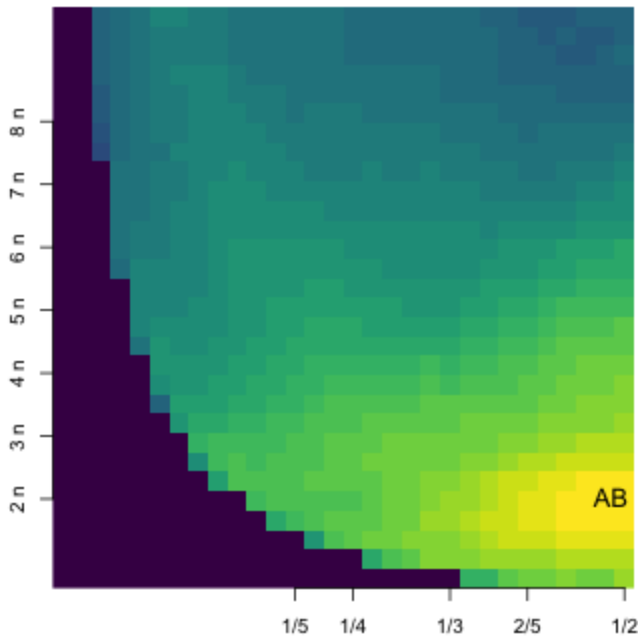

AB

1

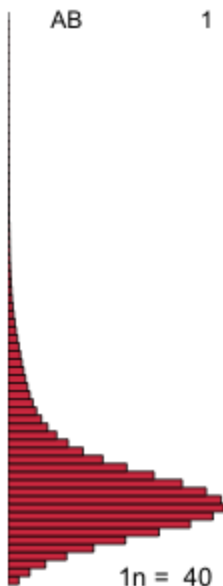

Normalized minor kmer coverage:  $B / (A + B)$

# MEX51

proposed diploid

log kmers pairs

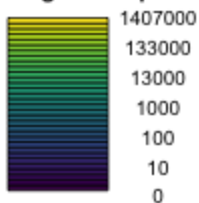

Total coverage of the kmer pair:  $A + B$

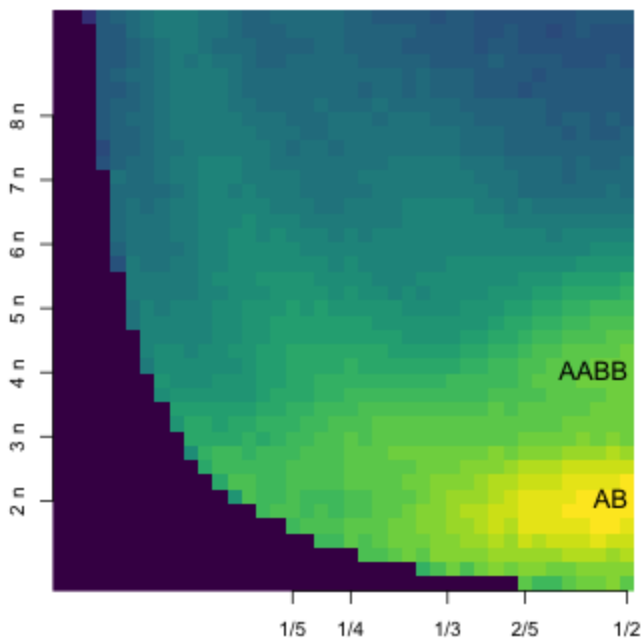

AB 0.95  
AABB 0.05

AABB

AB

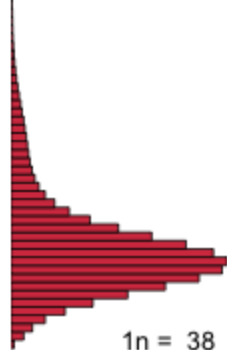

Normalized minor kmer coverage:  $B / (A + B)$

MEX59

proposed diploid

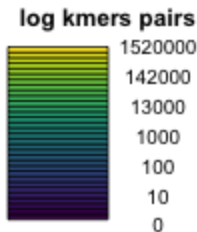

Total coverage of the kmer pair:  $A + B$

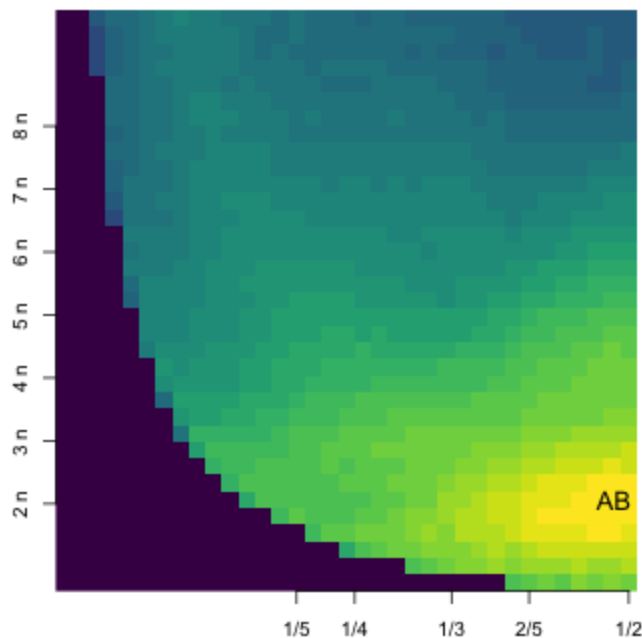

Normalized minor kmer coverage:  $B / (A + B)$

AB

1

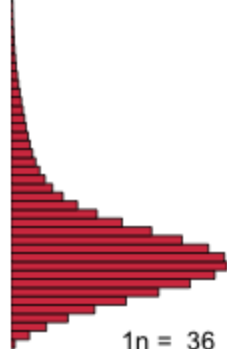

MEX67

proposed diploid

log kmers pairs

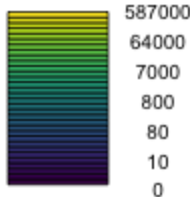

Total coverage of the kmer pair:  $A + B$

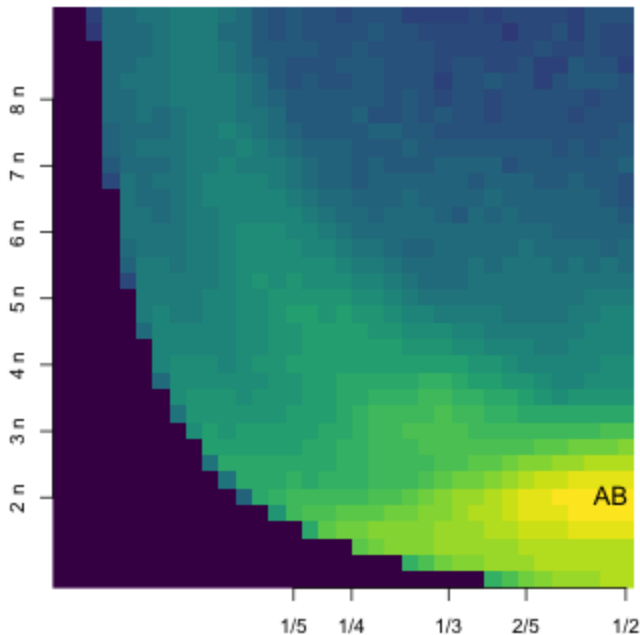

AB

1

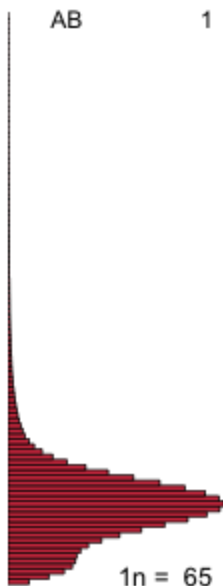

Normalized minor kmer coverage:  $B / (A + B)$

# MEX69

proposed diploid

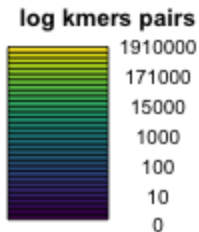

Total coverage of the kmer pair:  $A + B$

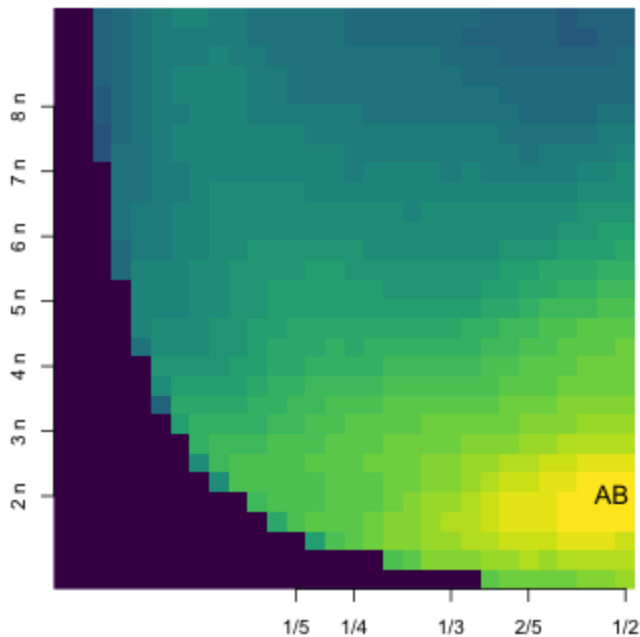

AB

1

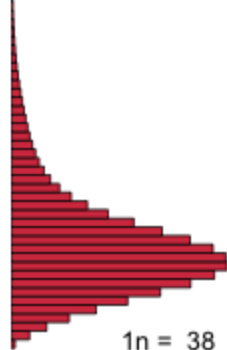

MEX79

proposed diploid

log kmers pairs

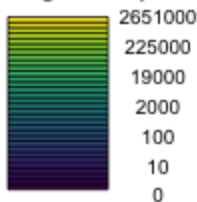

AB 0.95  
AABB 0.05

Total coverage of the kmer pair: A + B

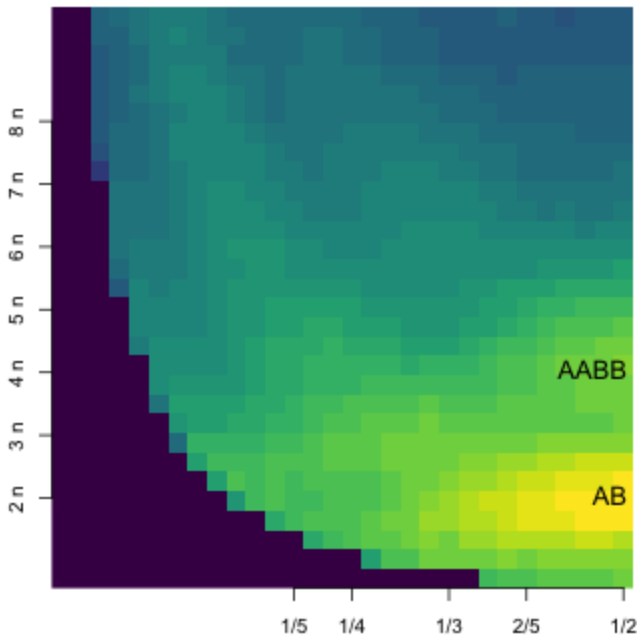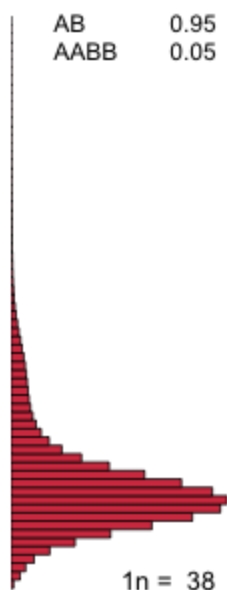

Normalized minor kmer coverage: B / (A + B)
