# Supplementary material for: Genomic Insights into Cultivated Mexican Vanilla planifolia Reveal High Levels of Heterozygosity Stemming from Hybridization
Source: MDPI journal article supplement (doi:10.3390/plants11162090), 2022-08-11

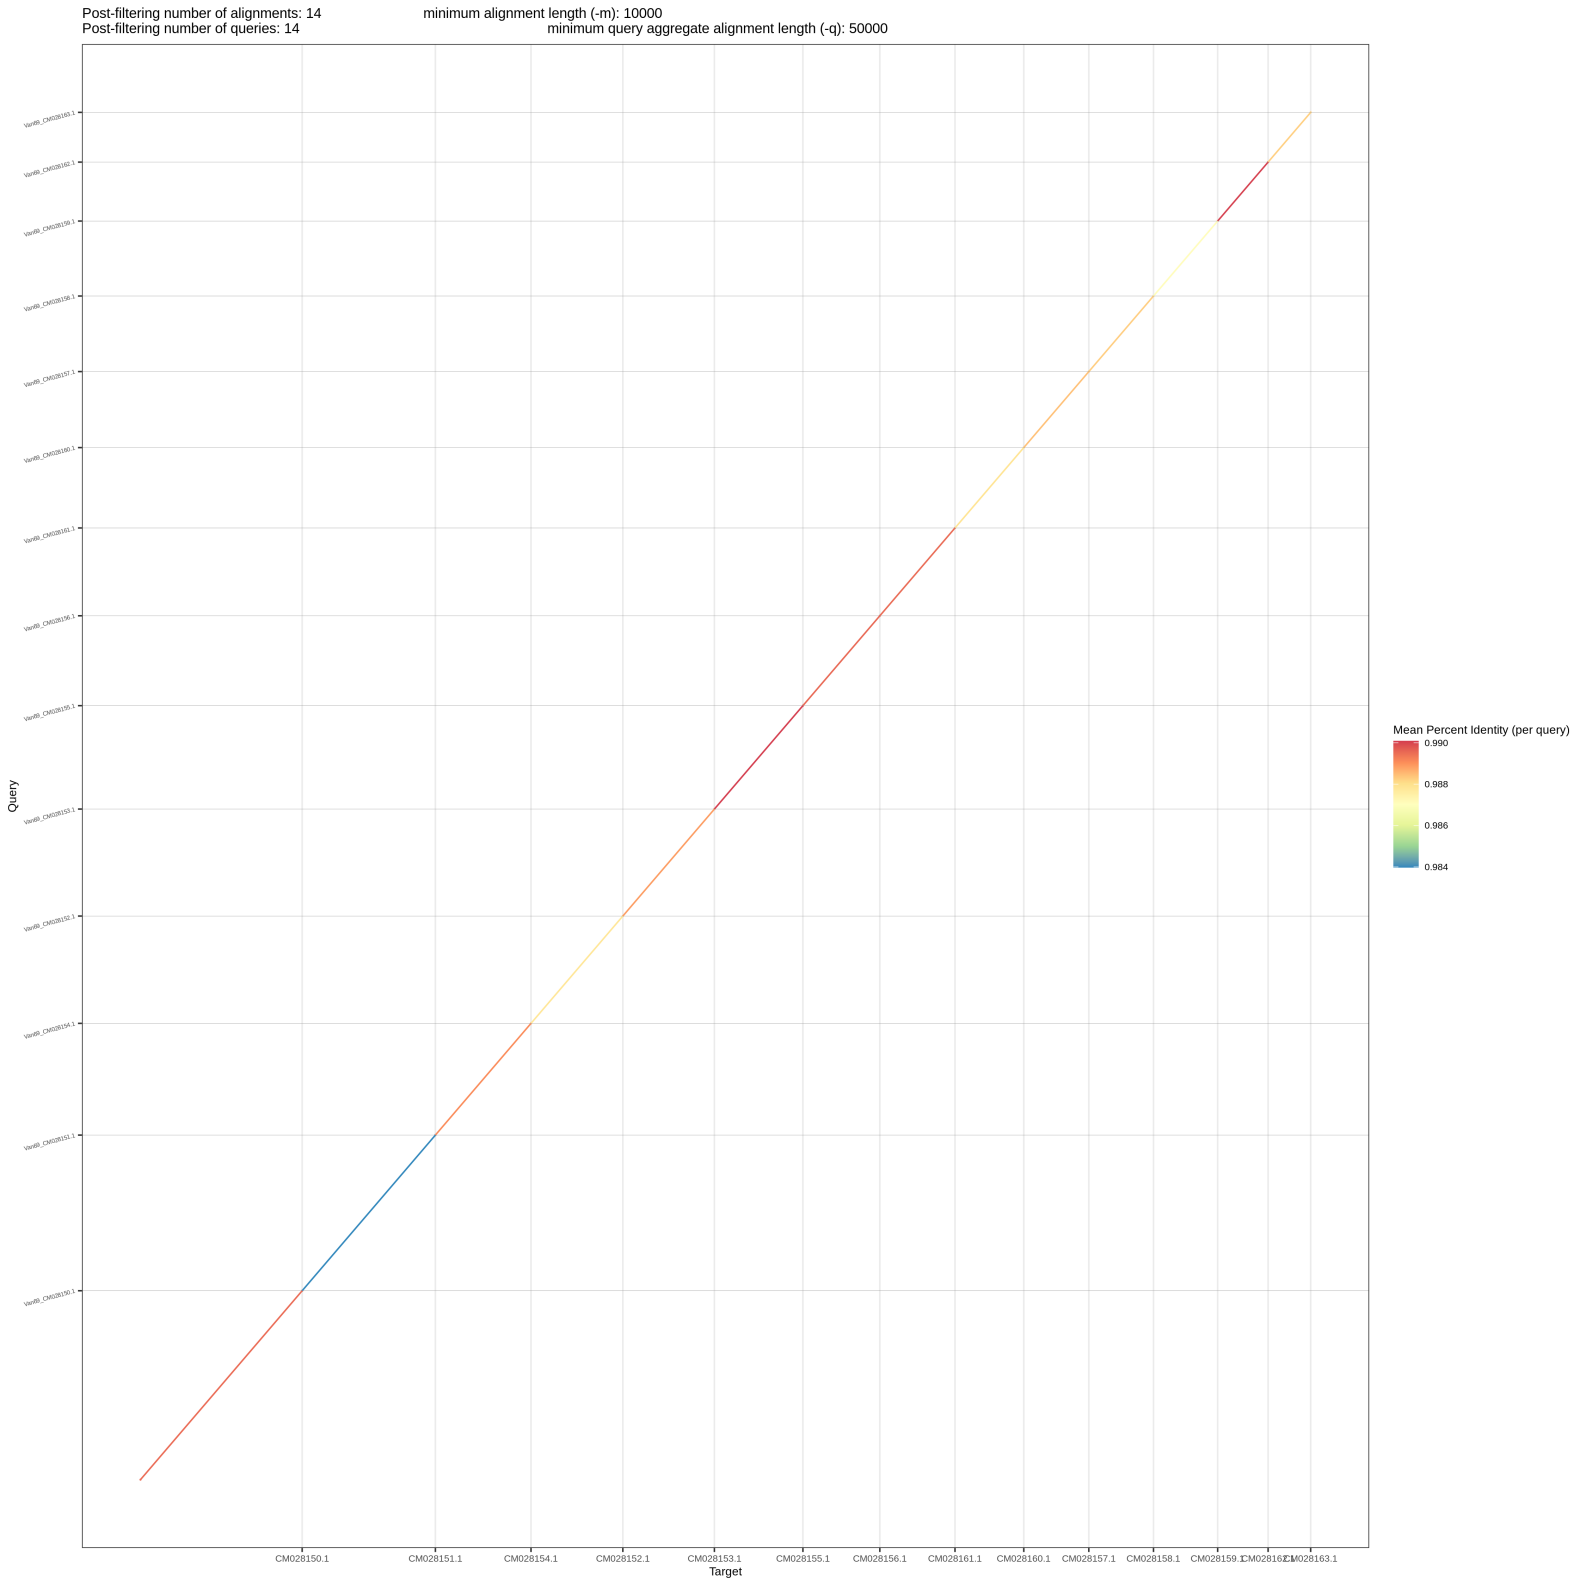

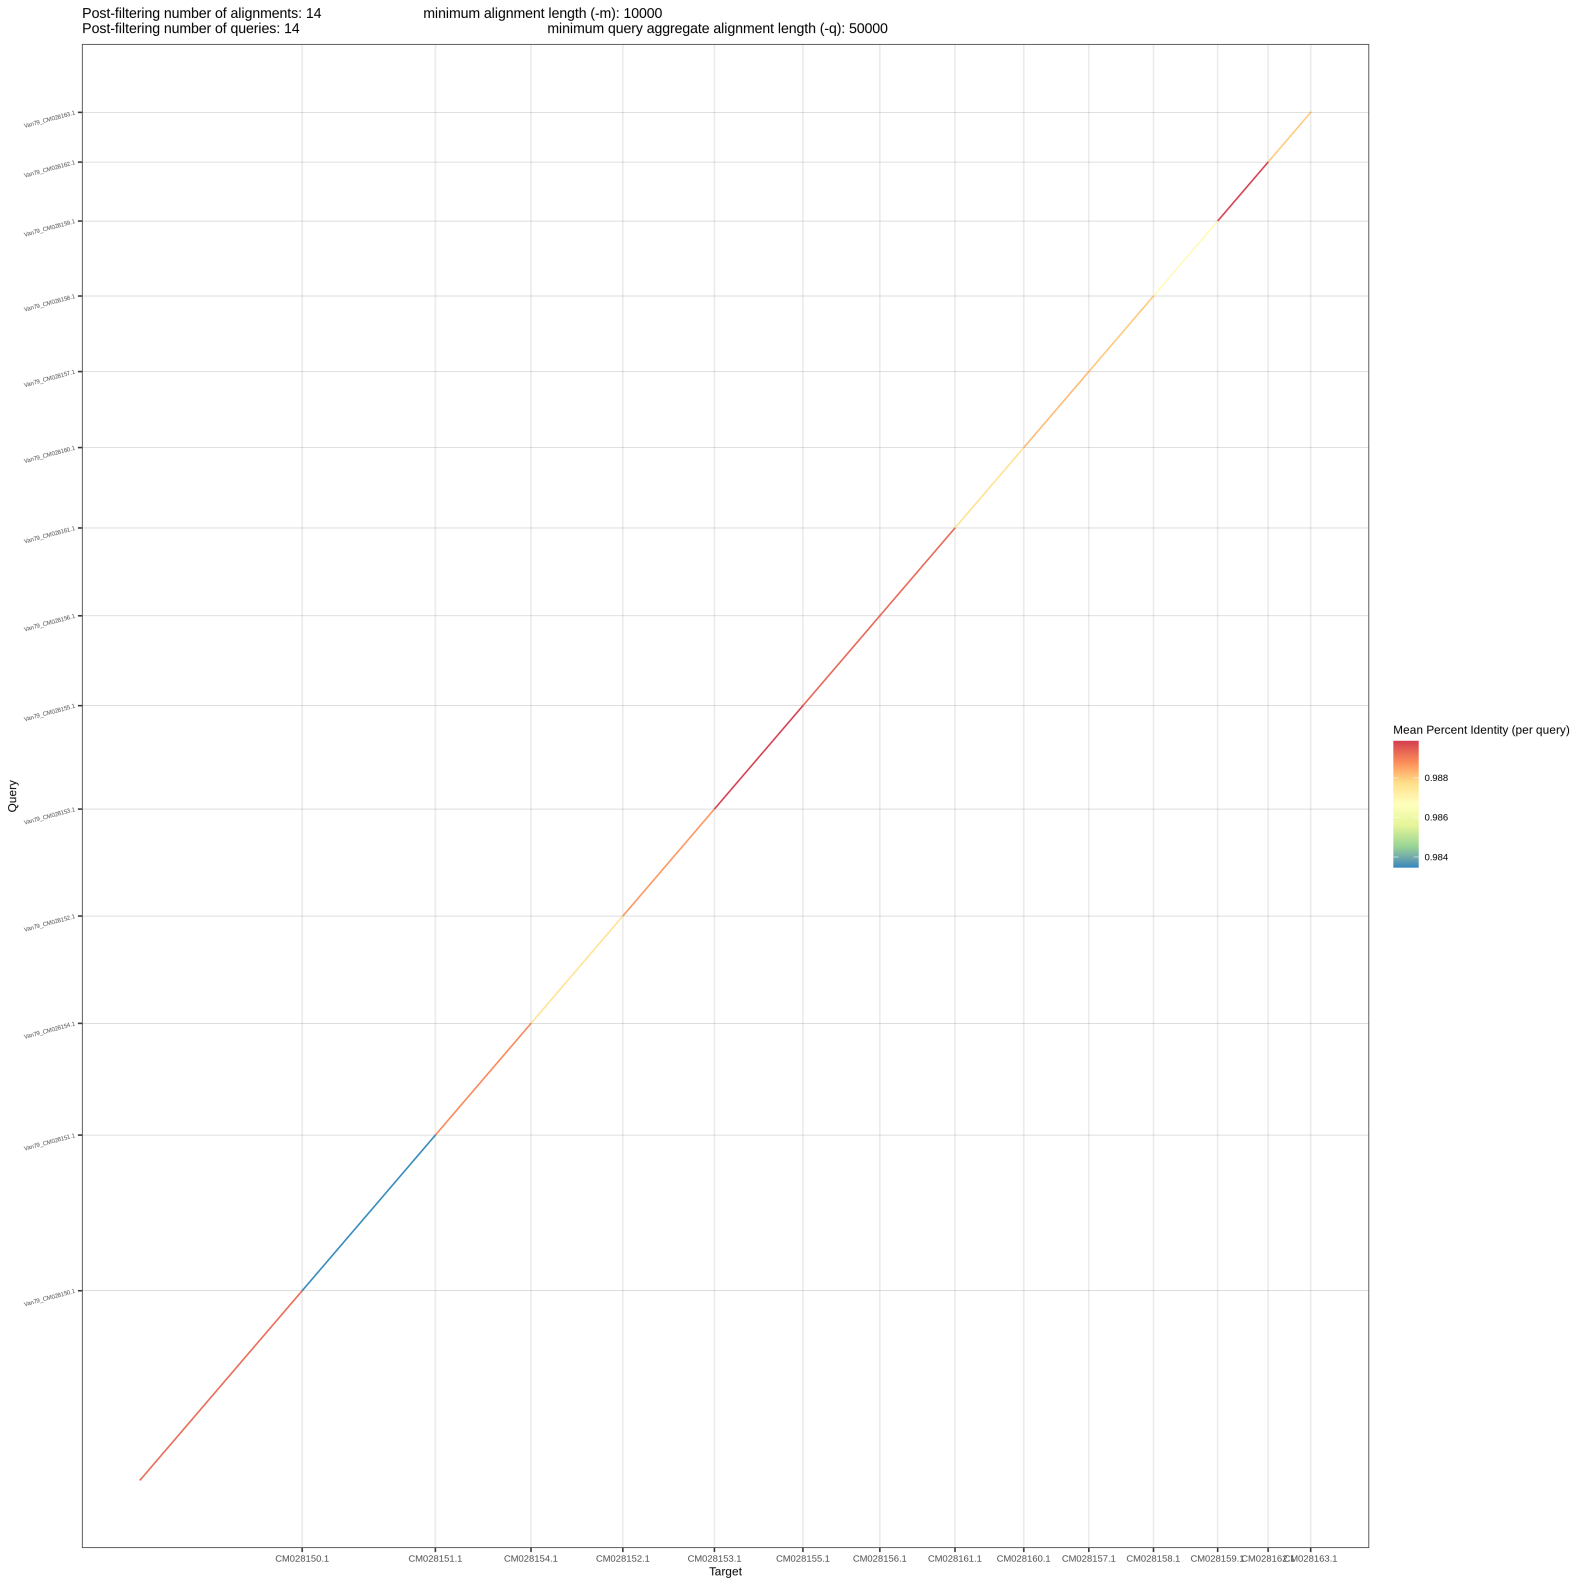

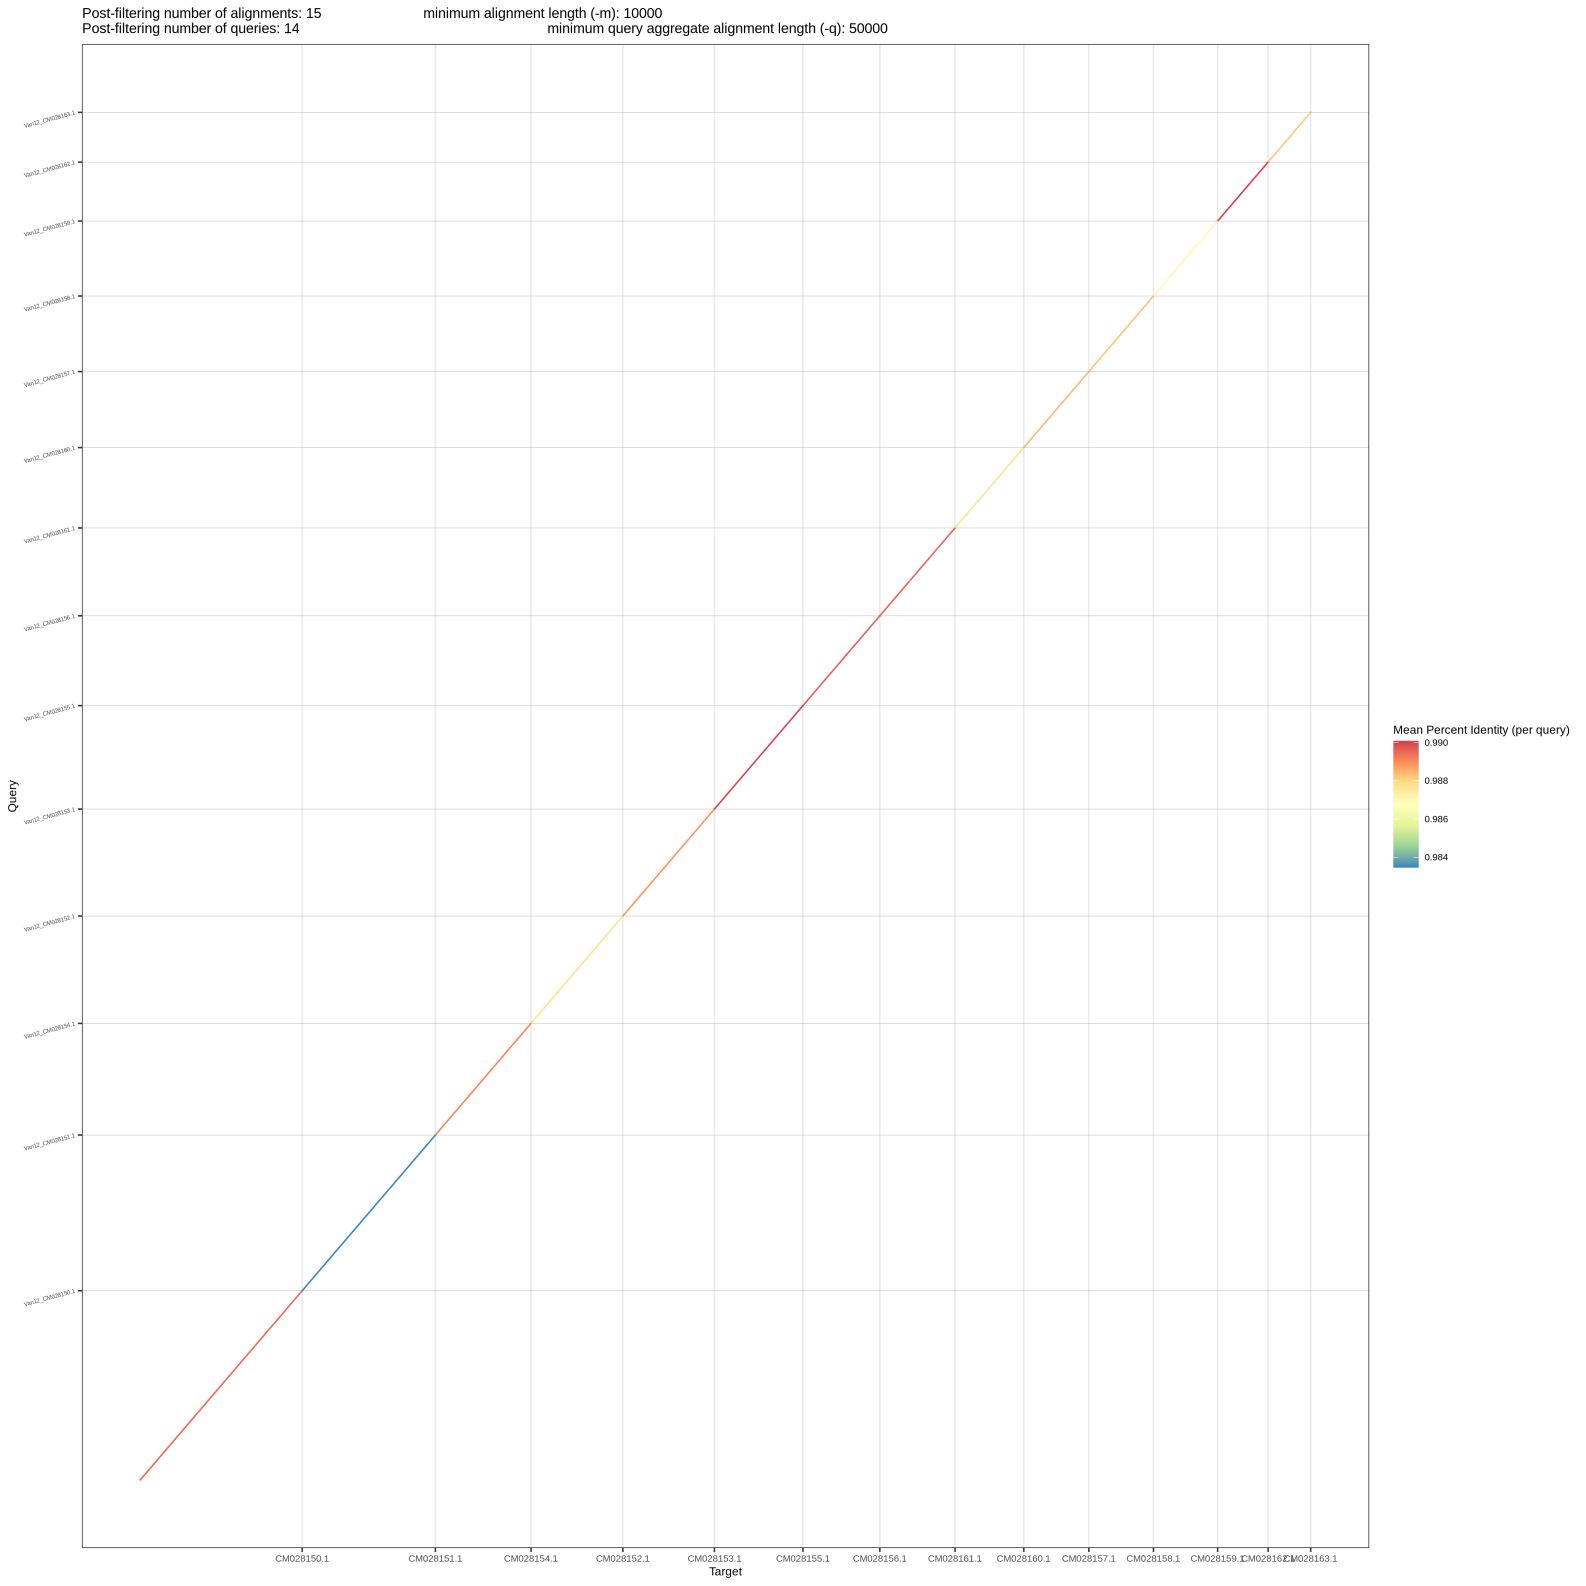

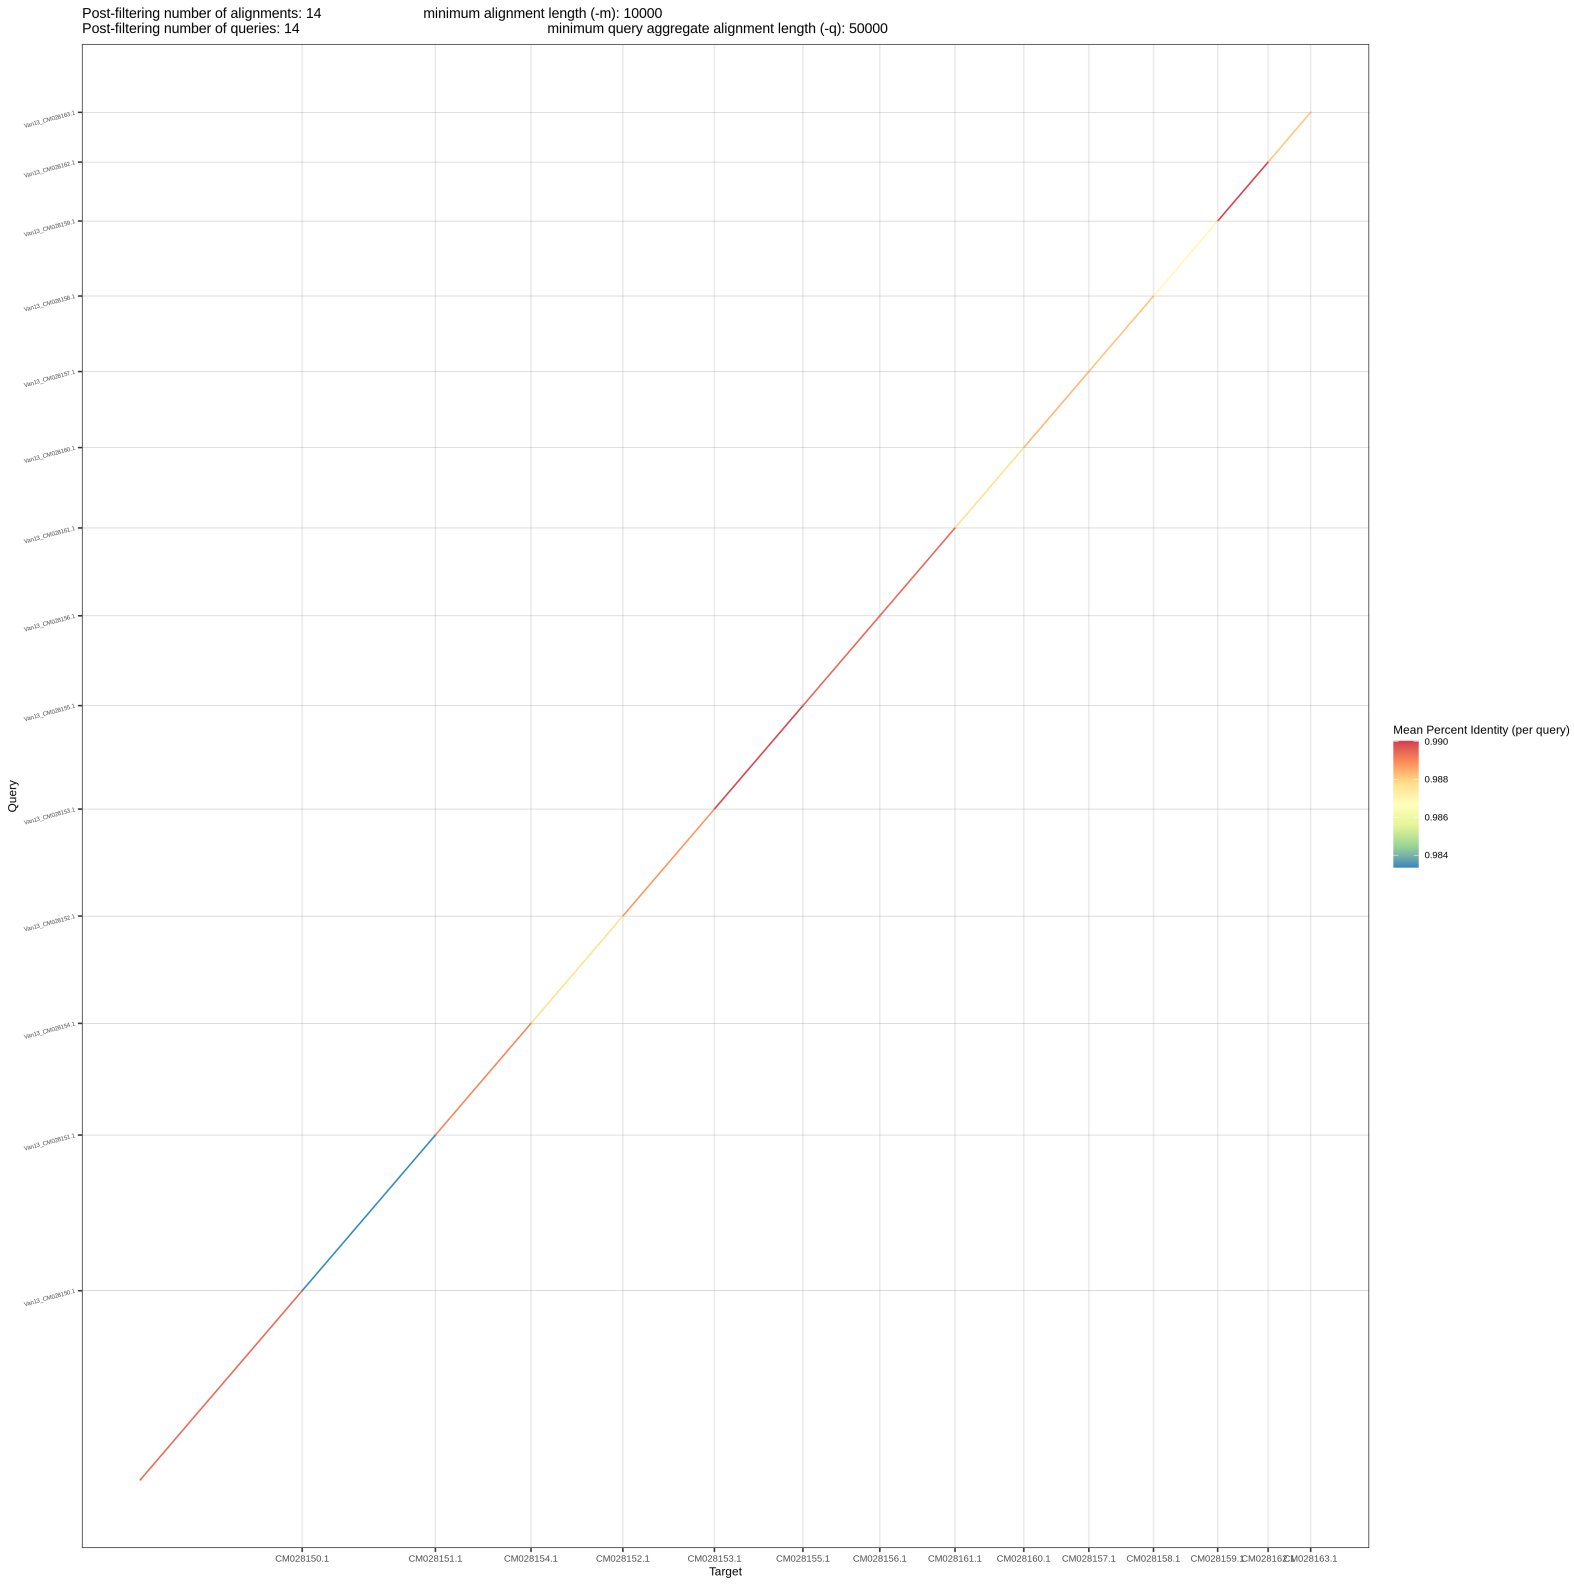

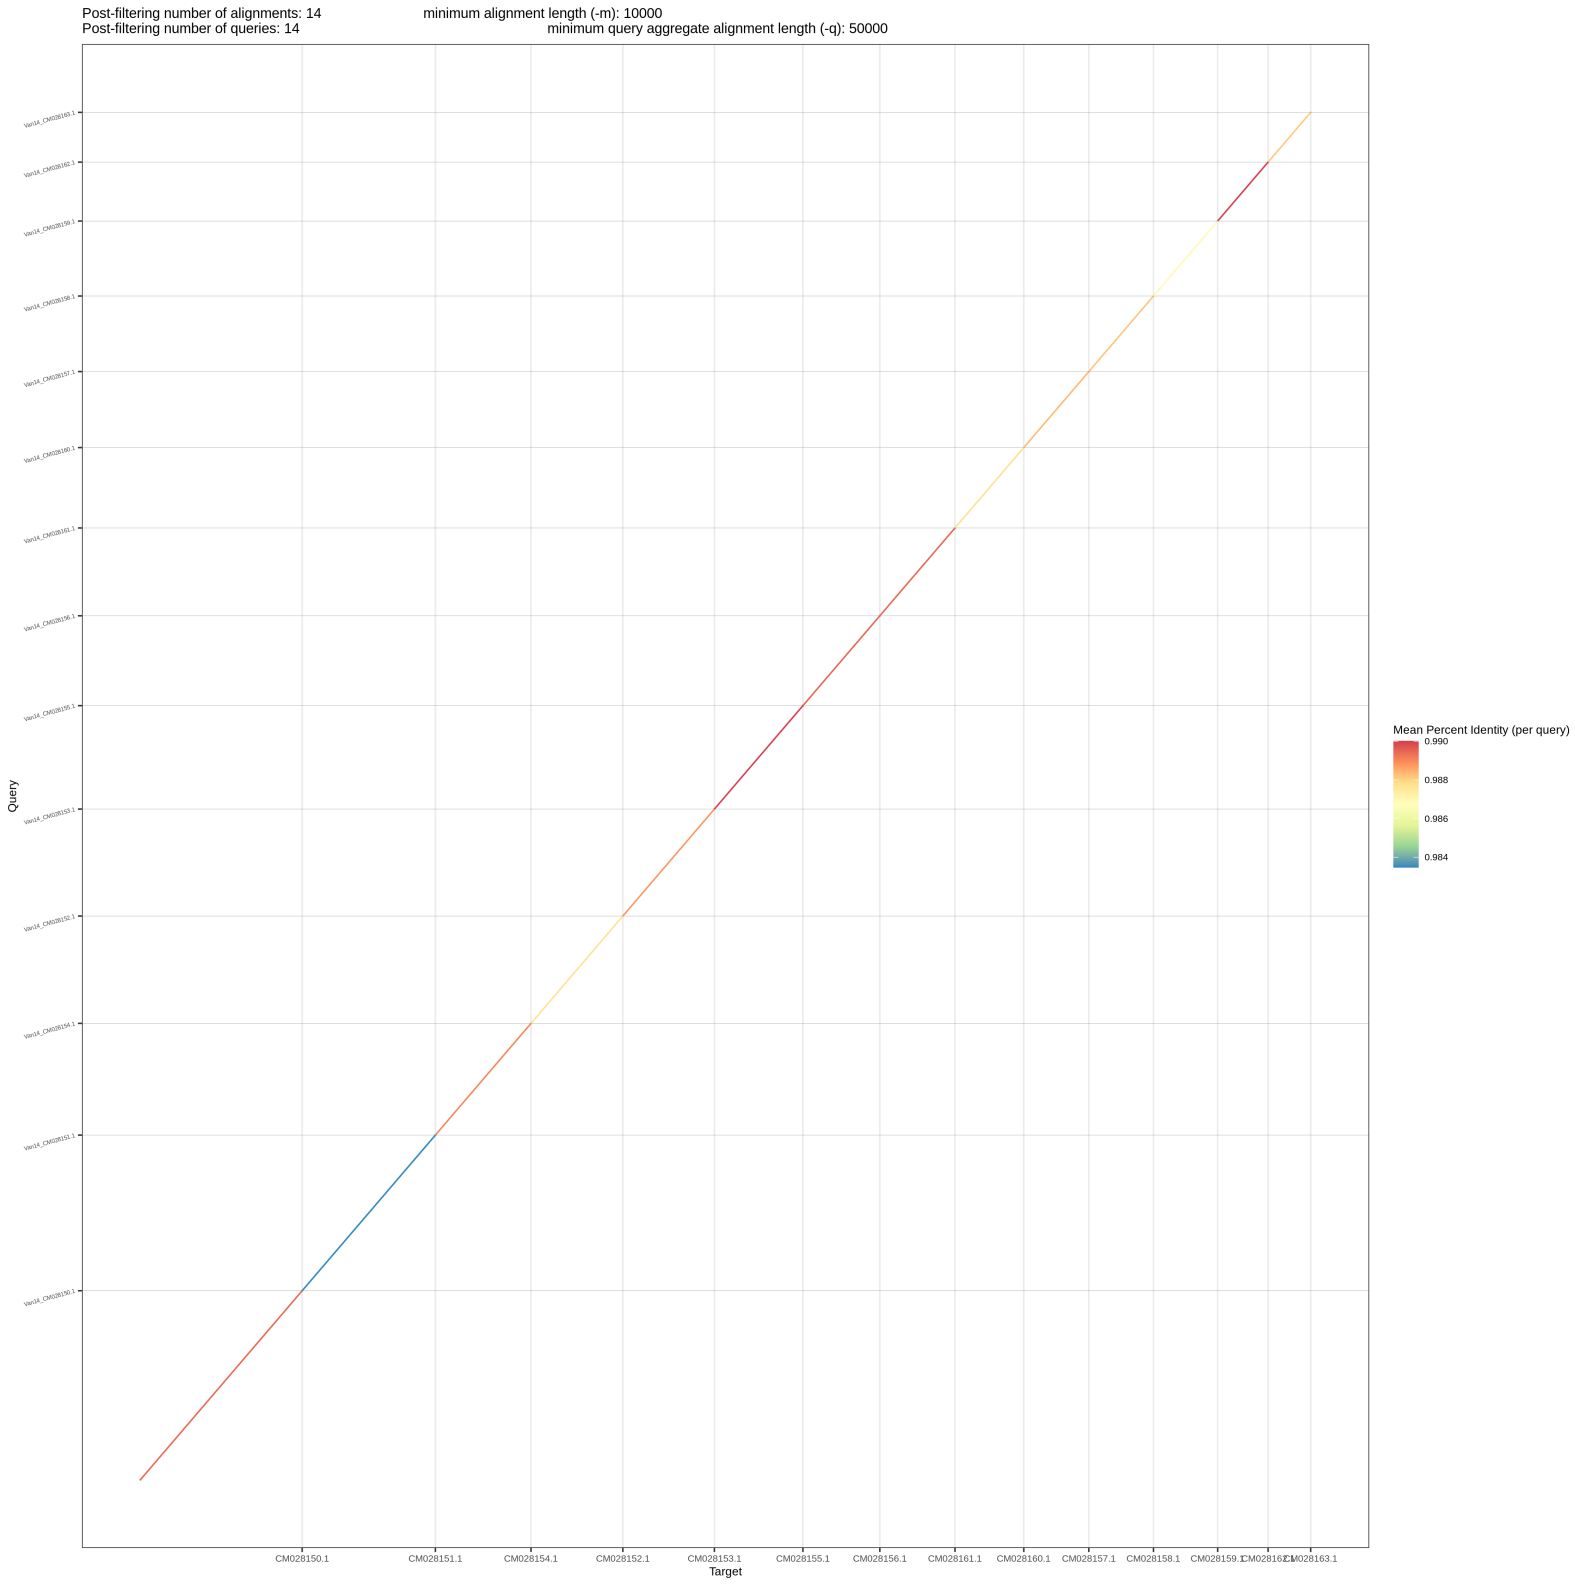

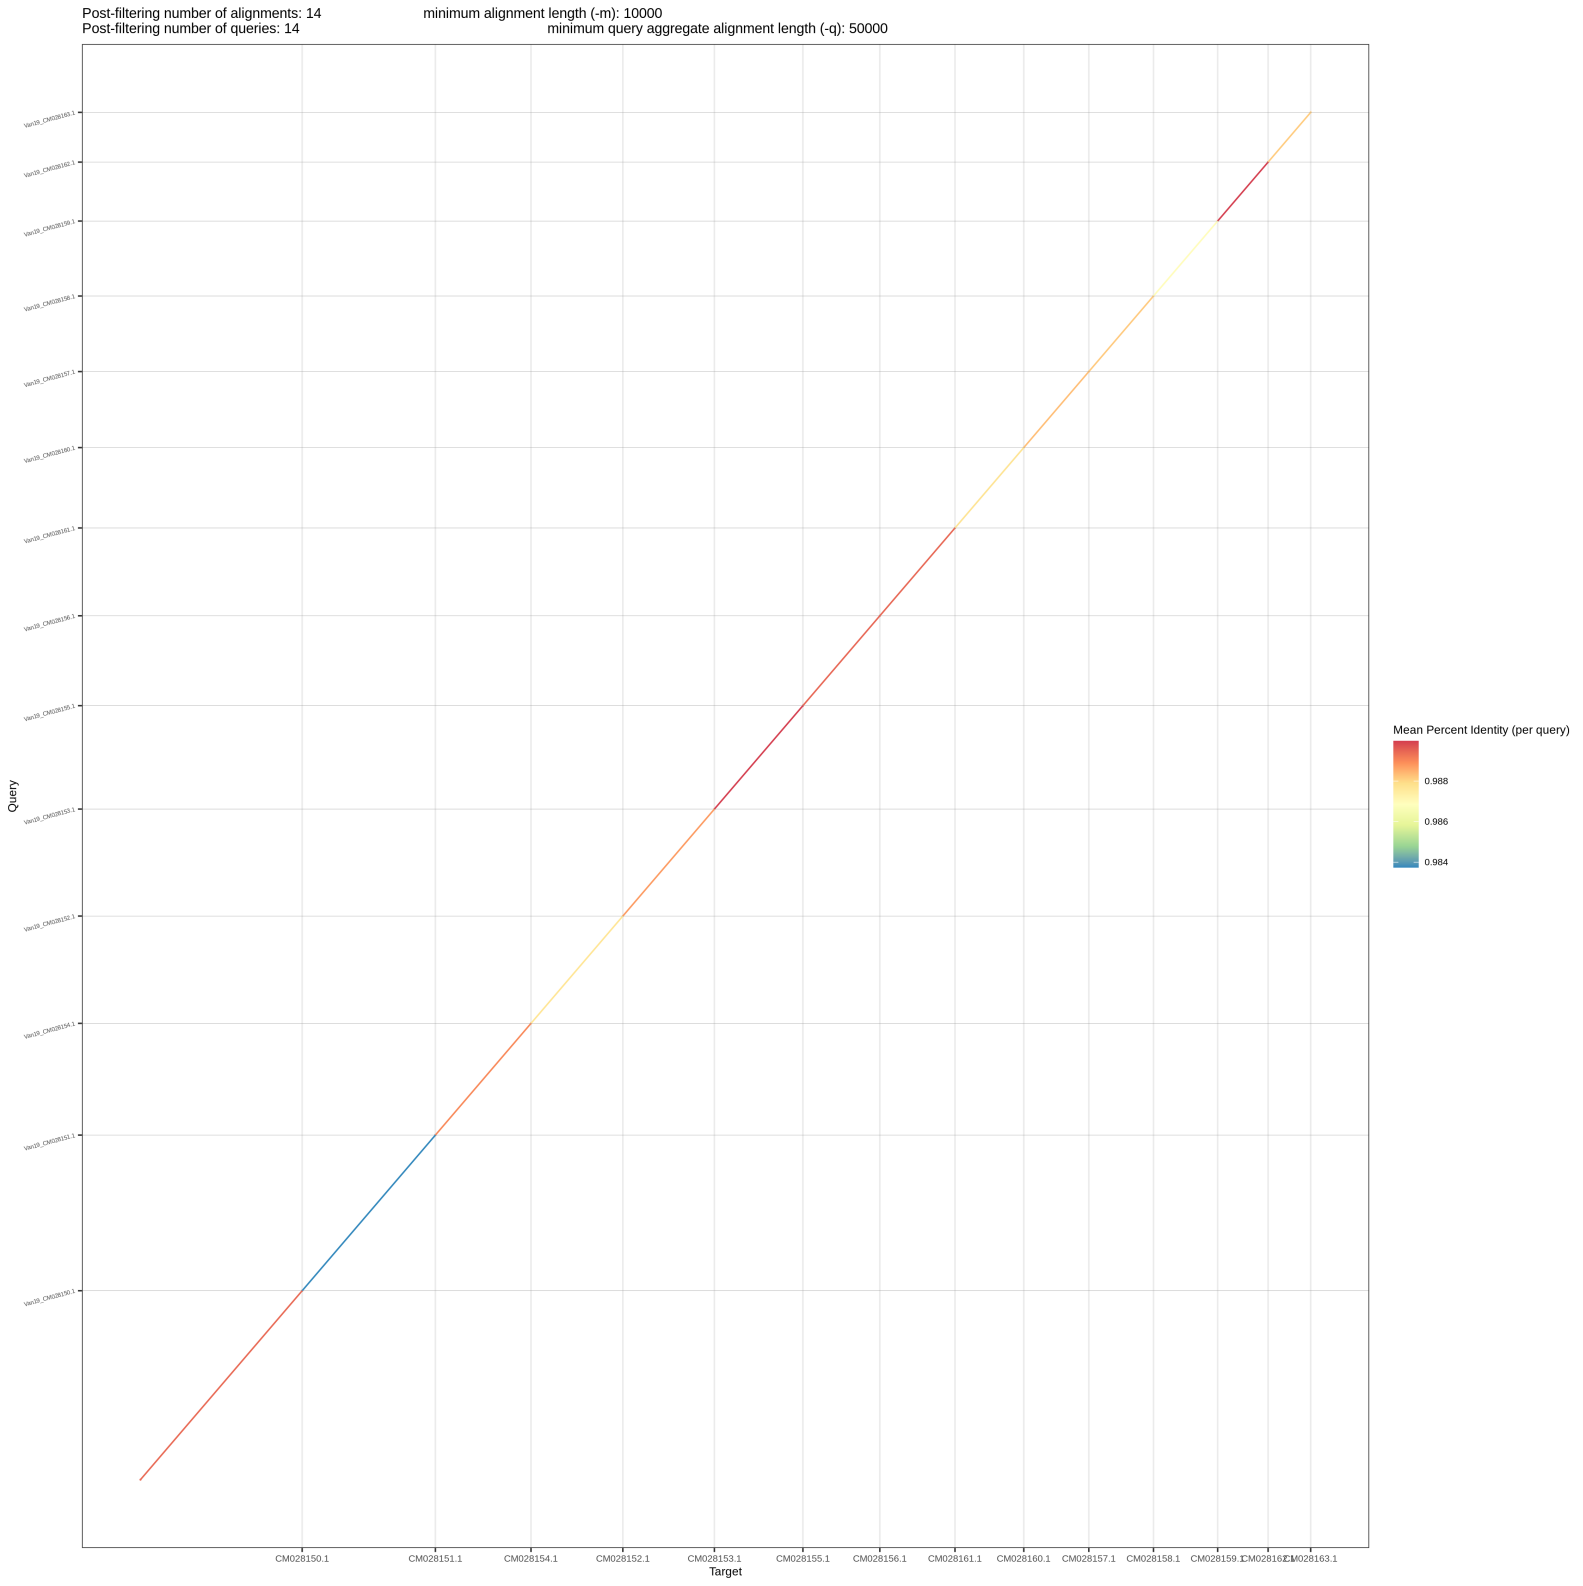

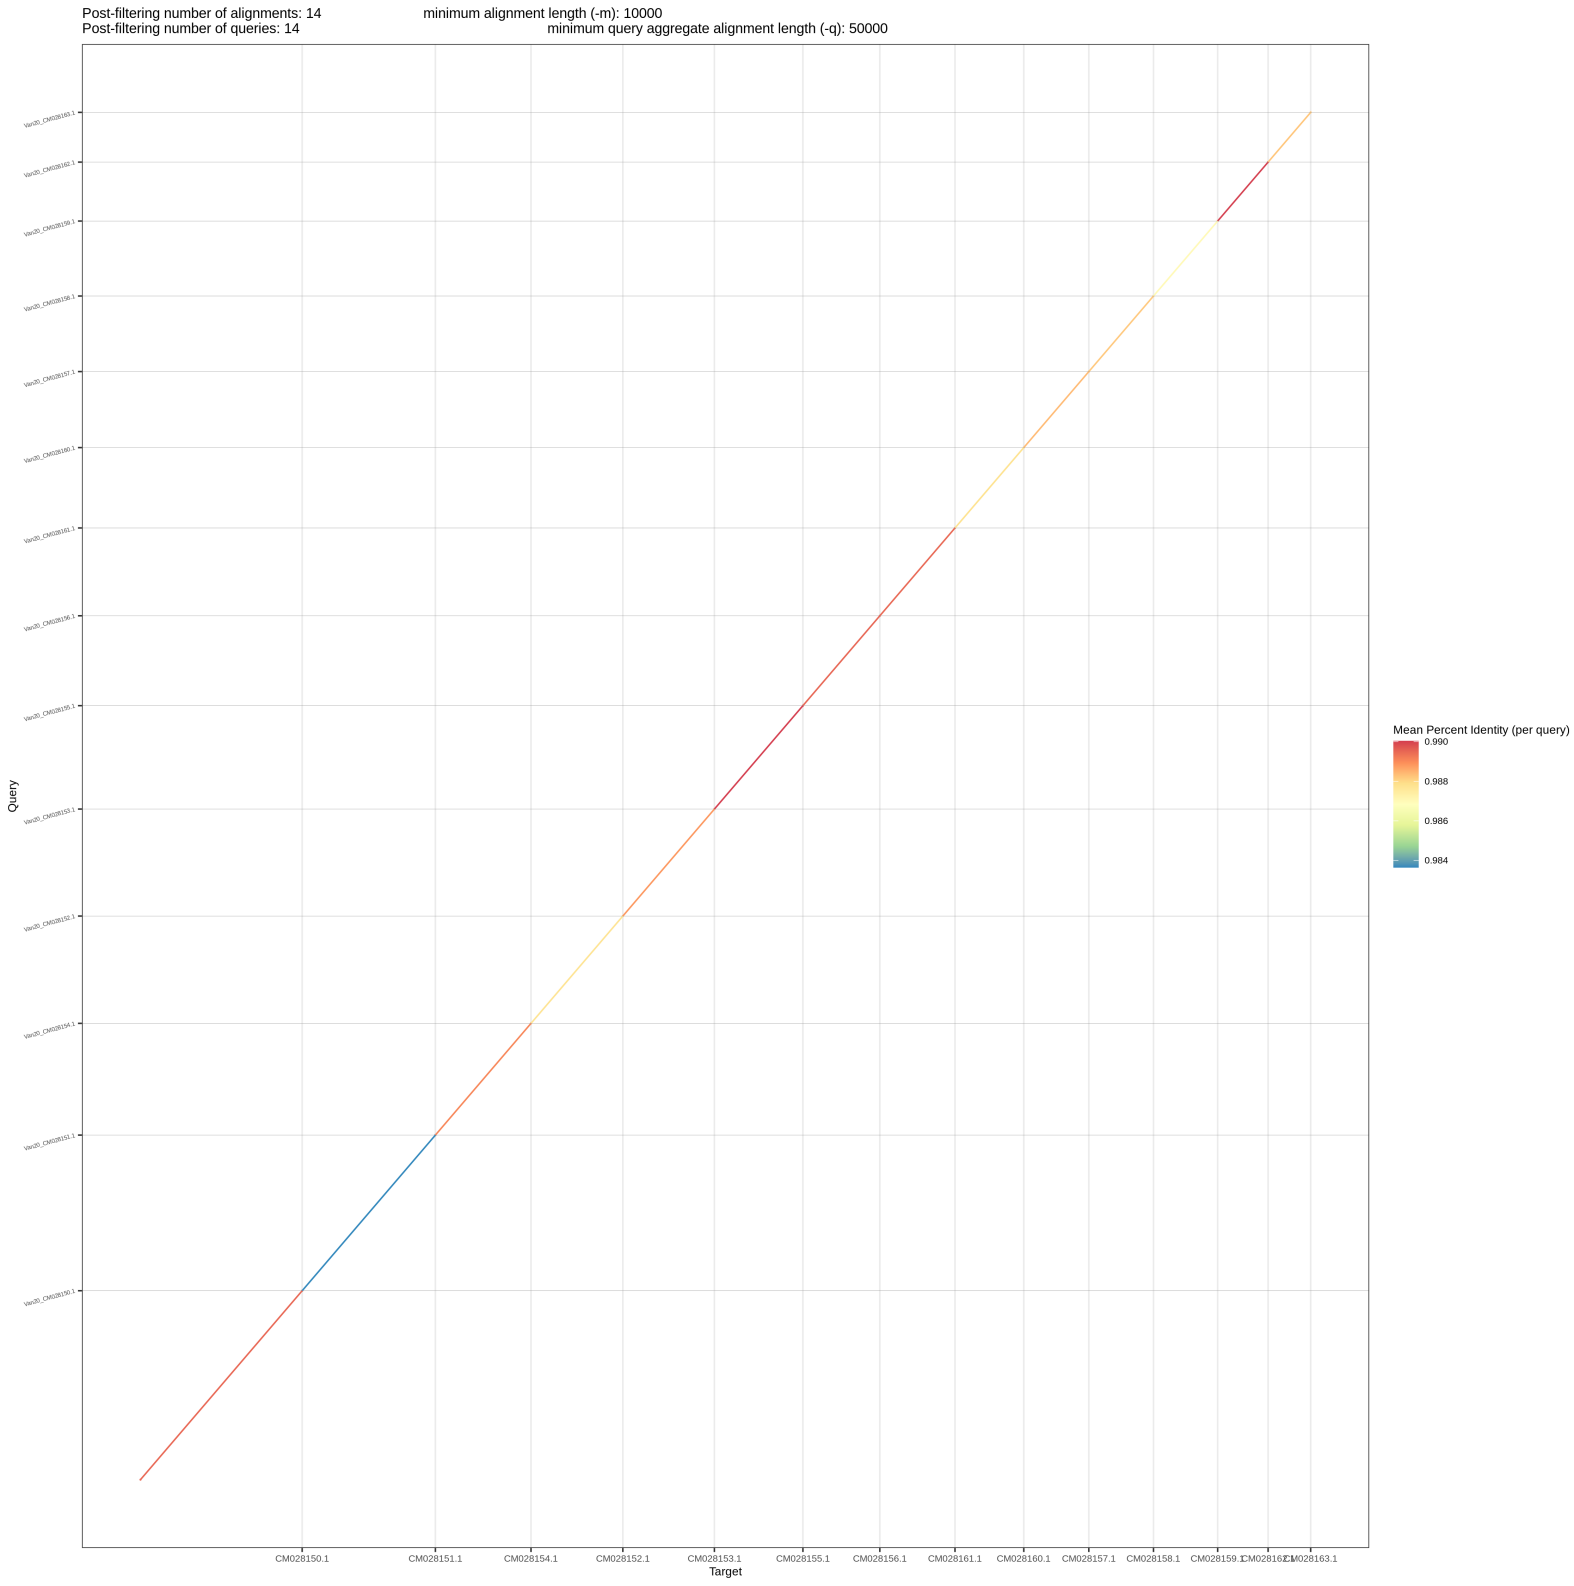

Post-filtering number of alignments: 14  
Post-filtering number of queries: 14

```

minimum alignment length (-m): 10000
minimum query aggregate alignment length (-q): 50000

```



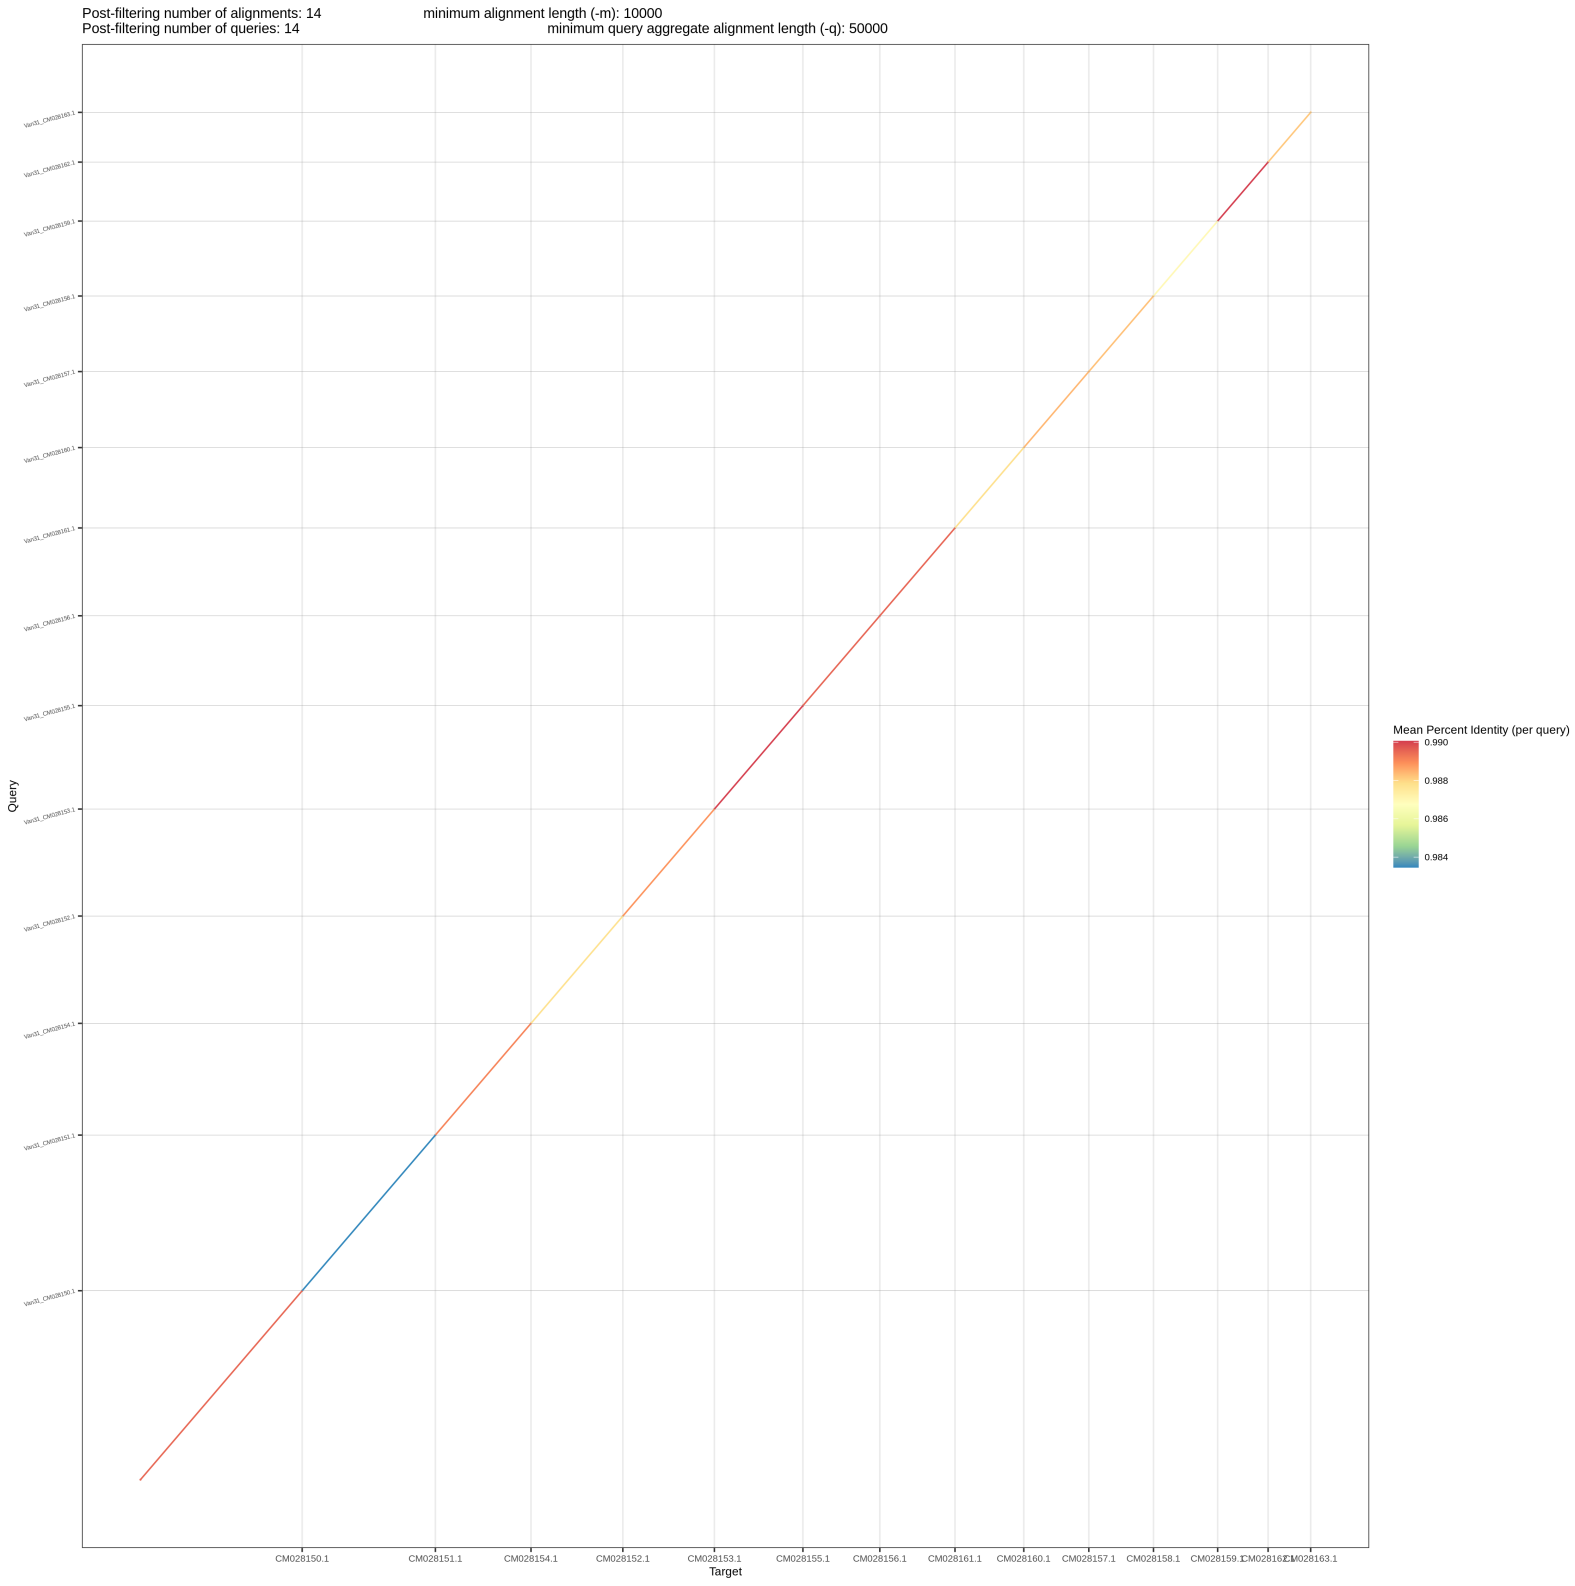

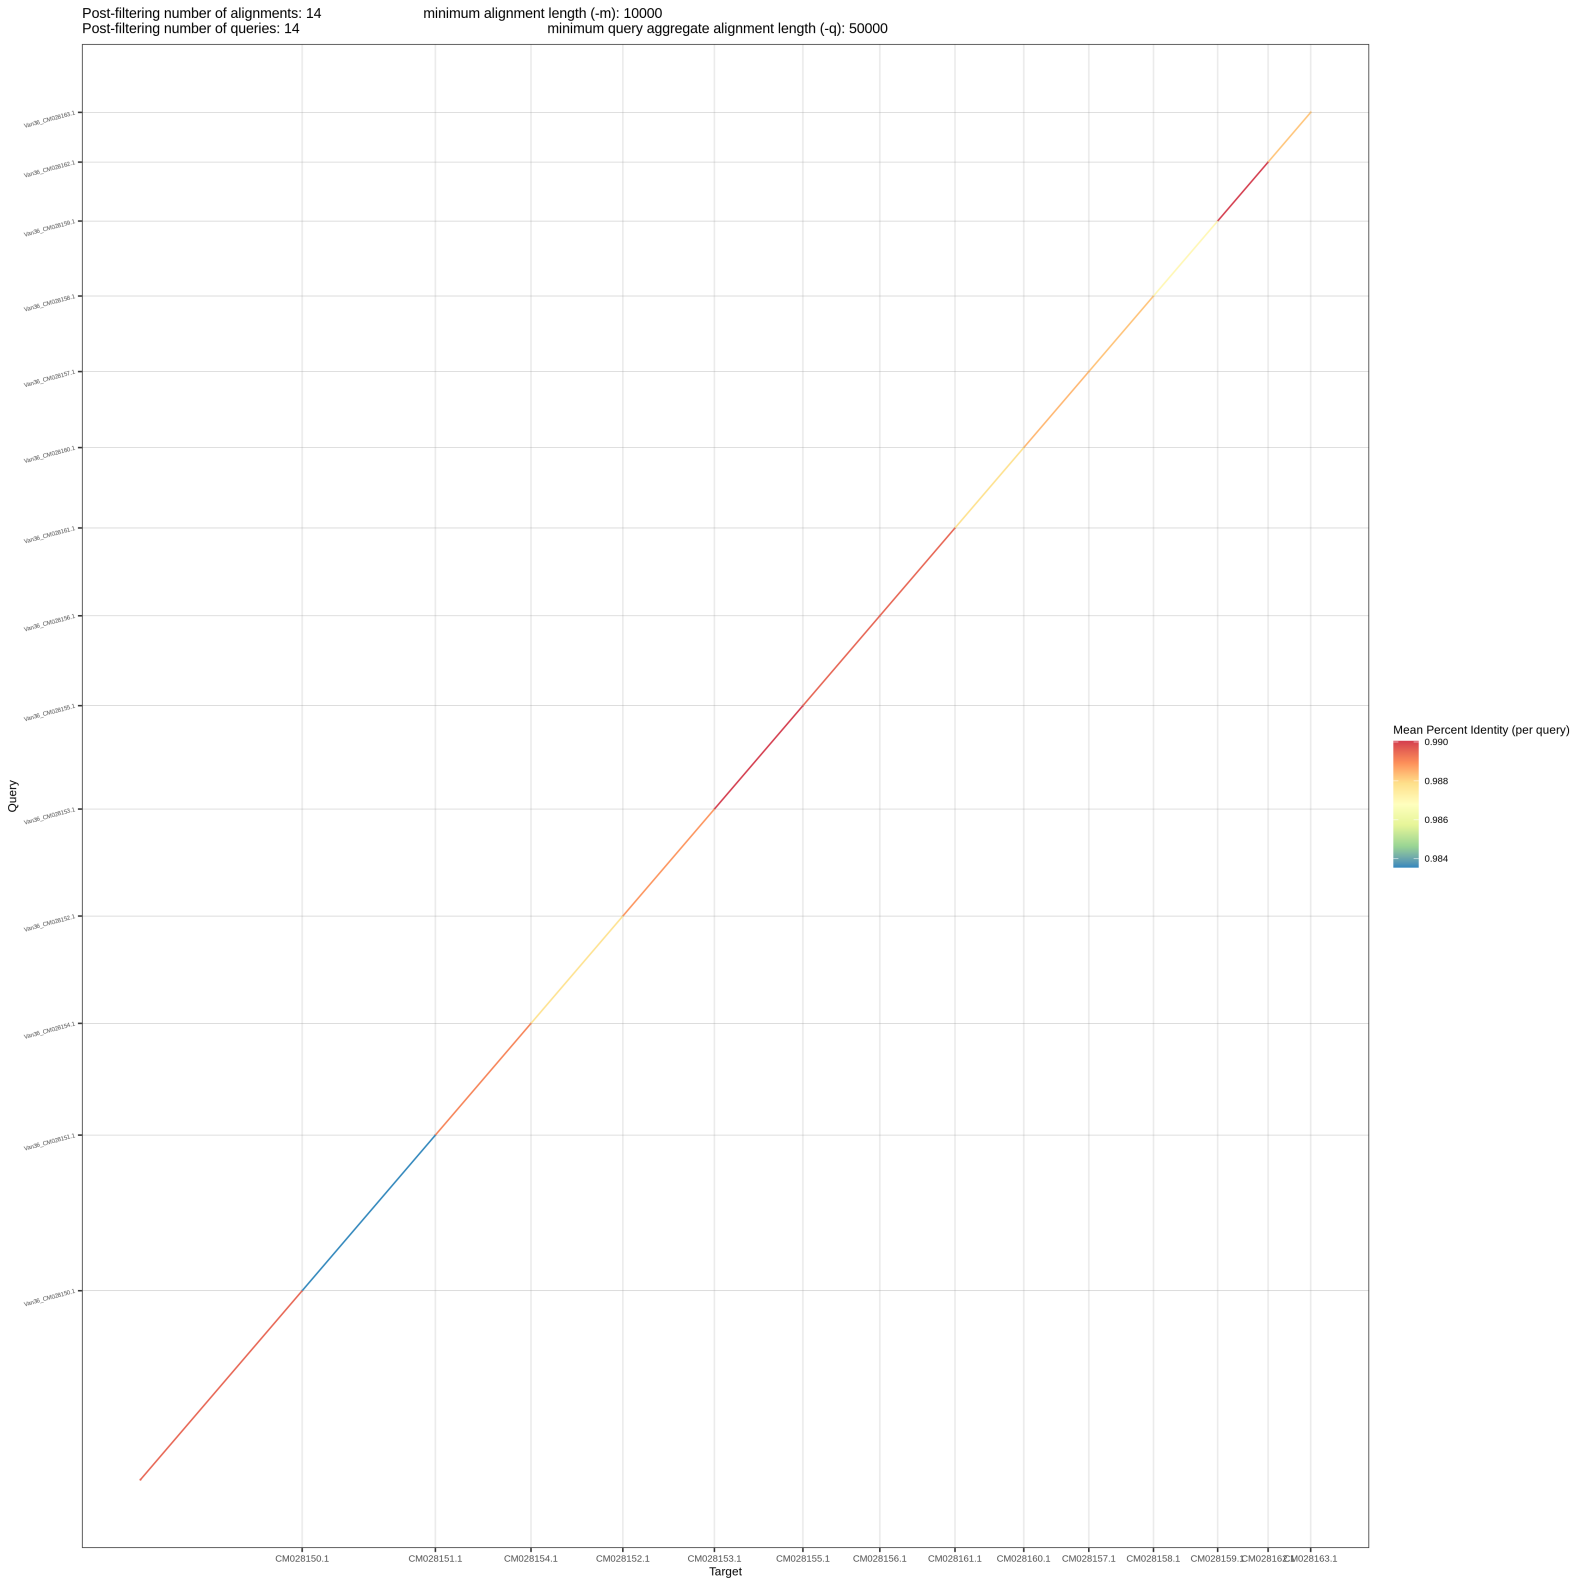

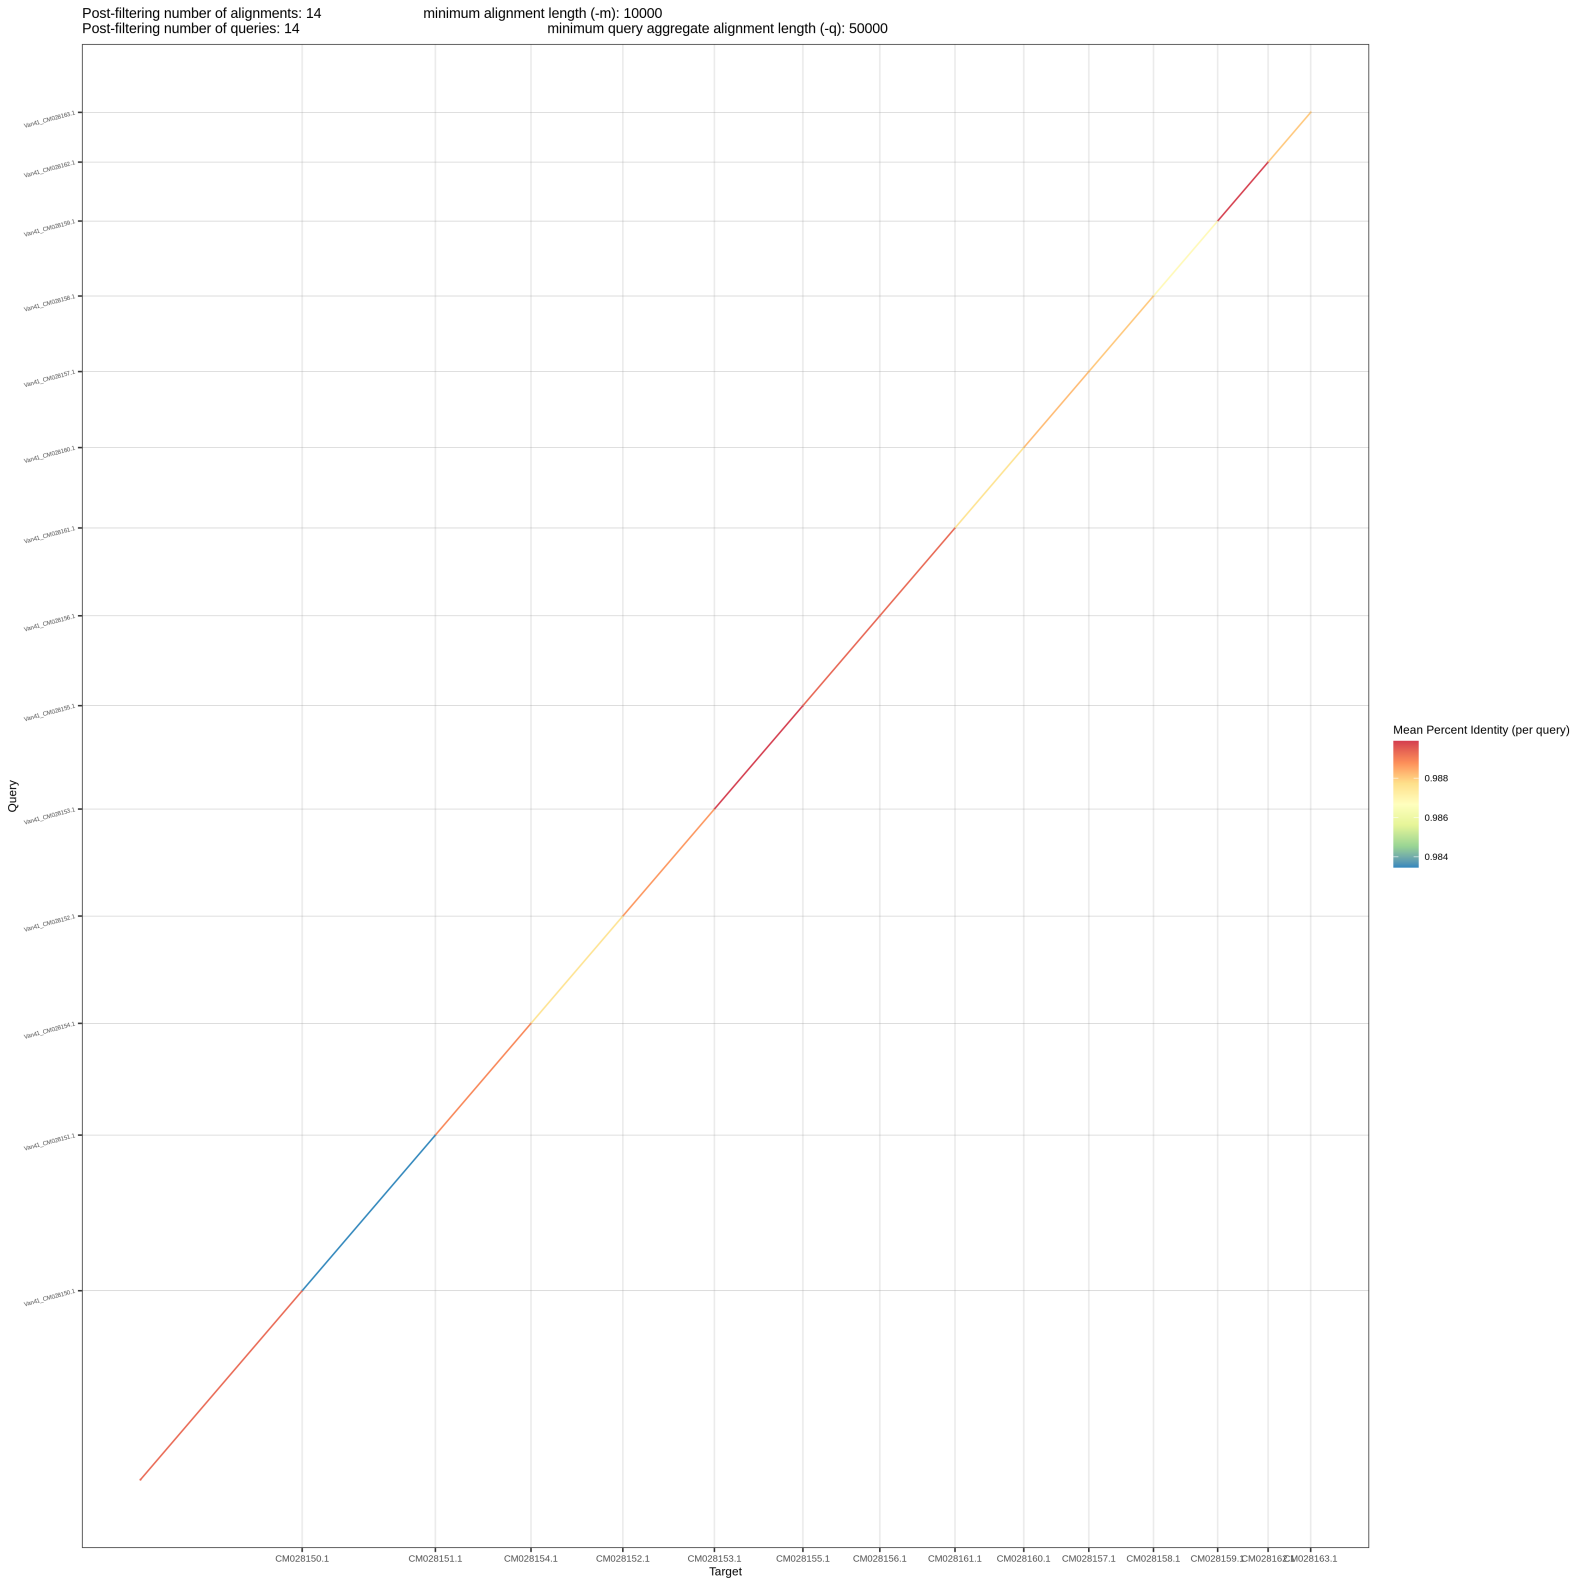

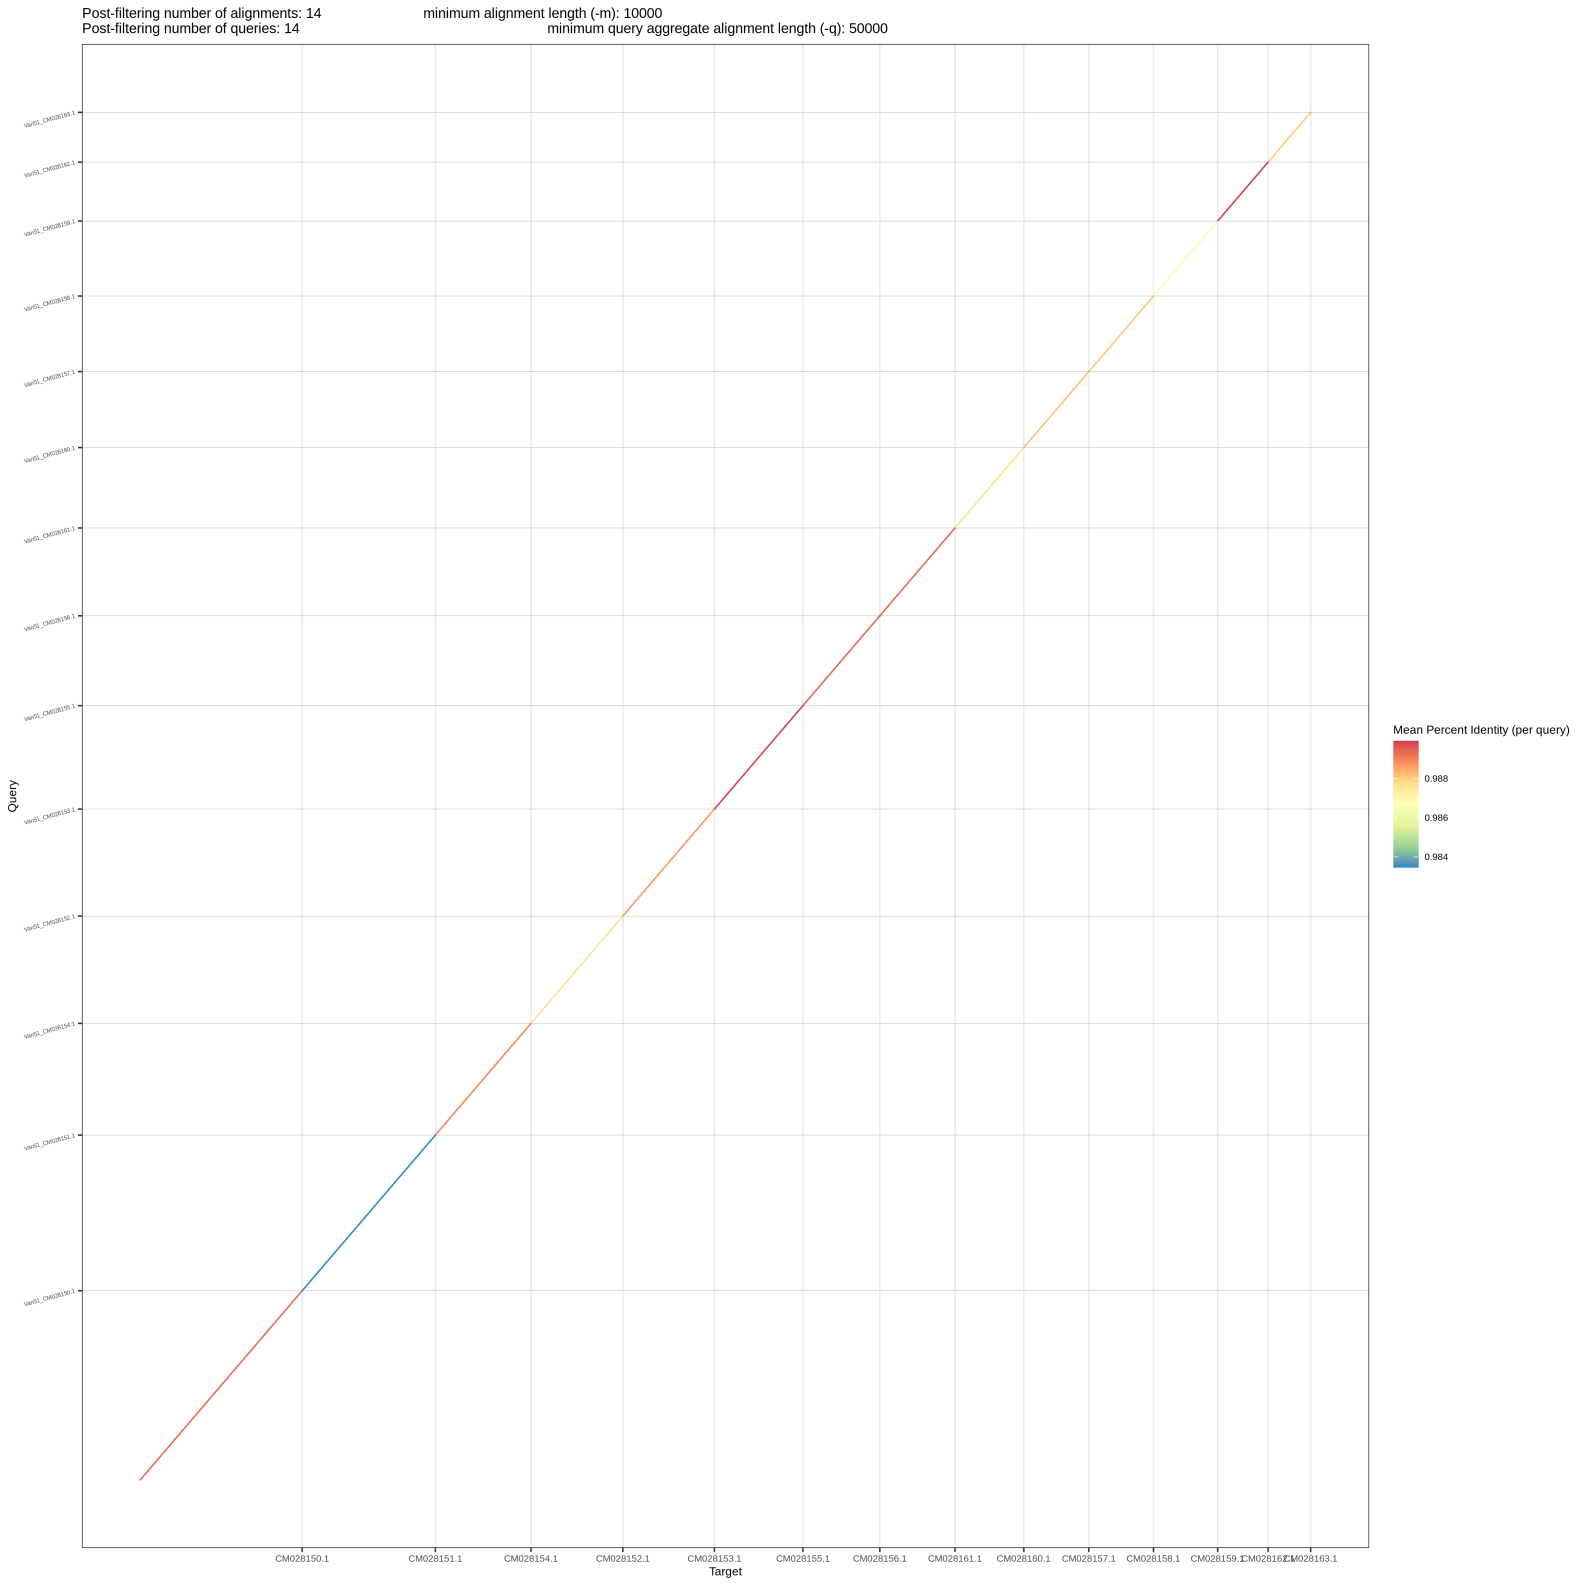

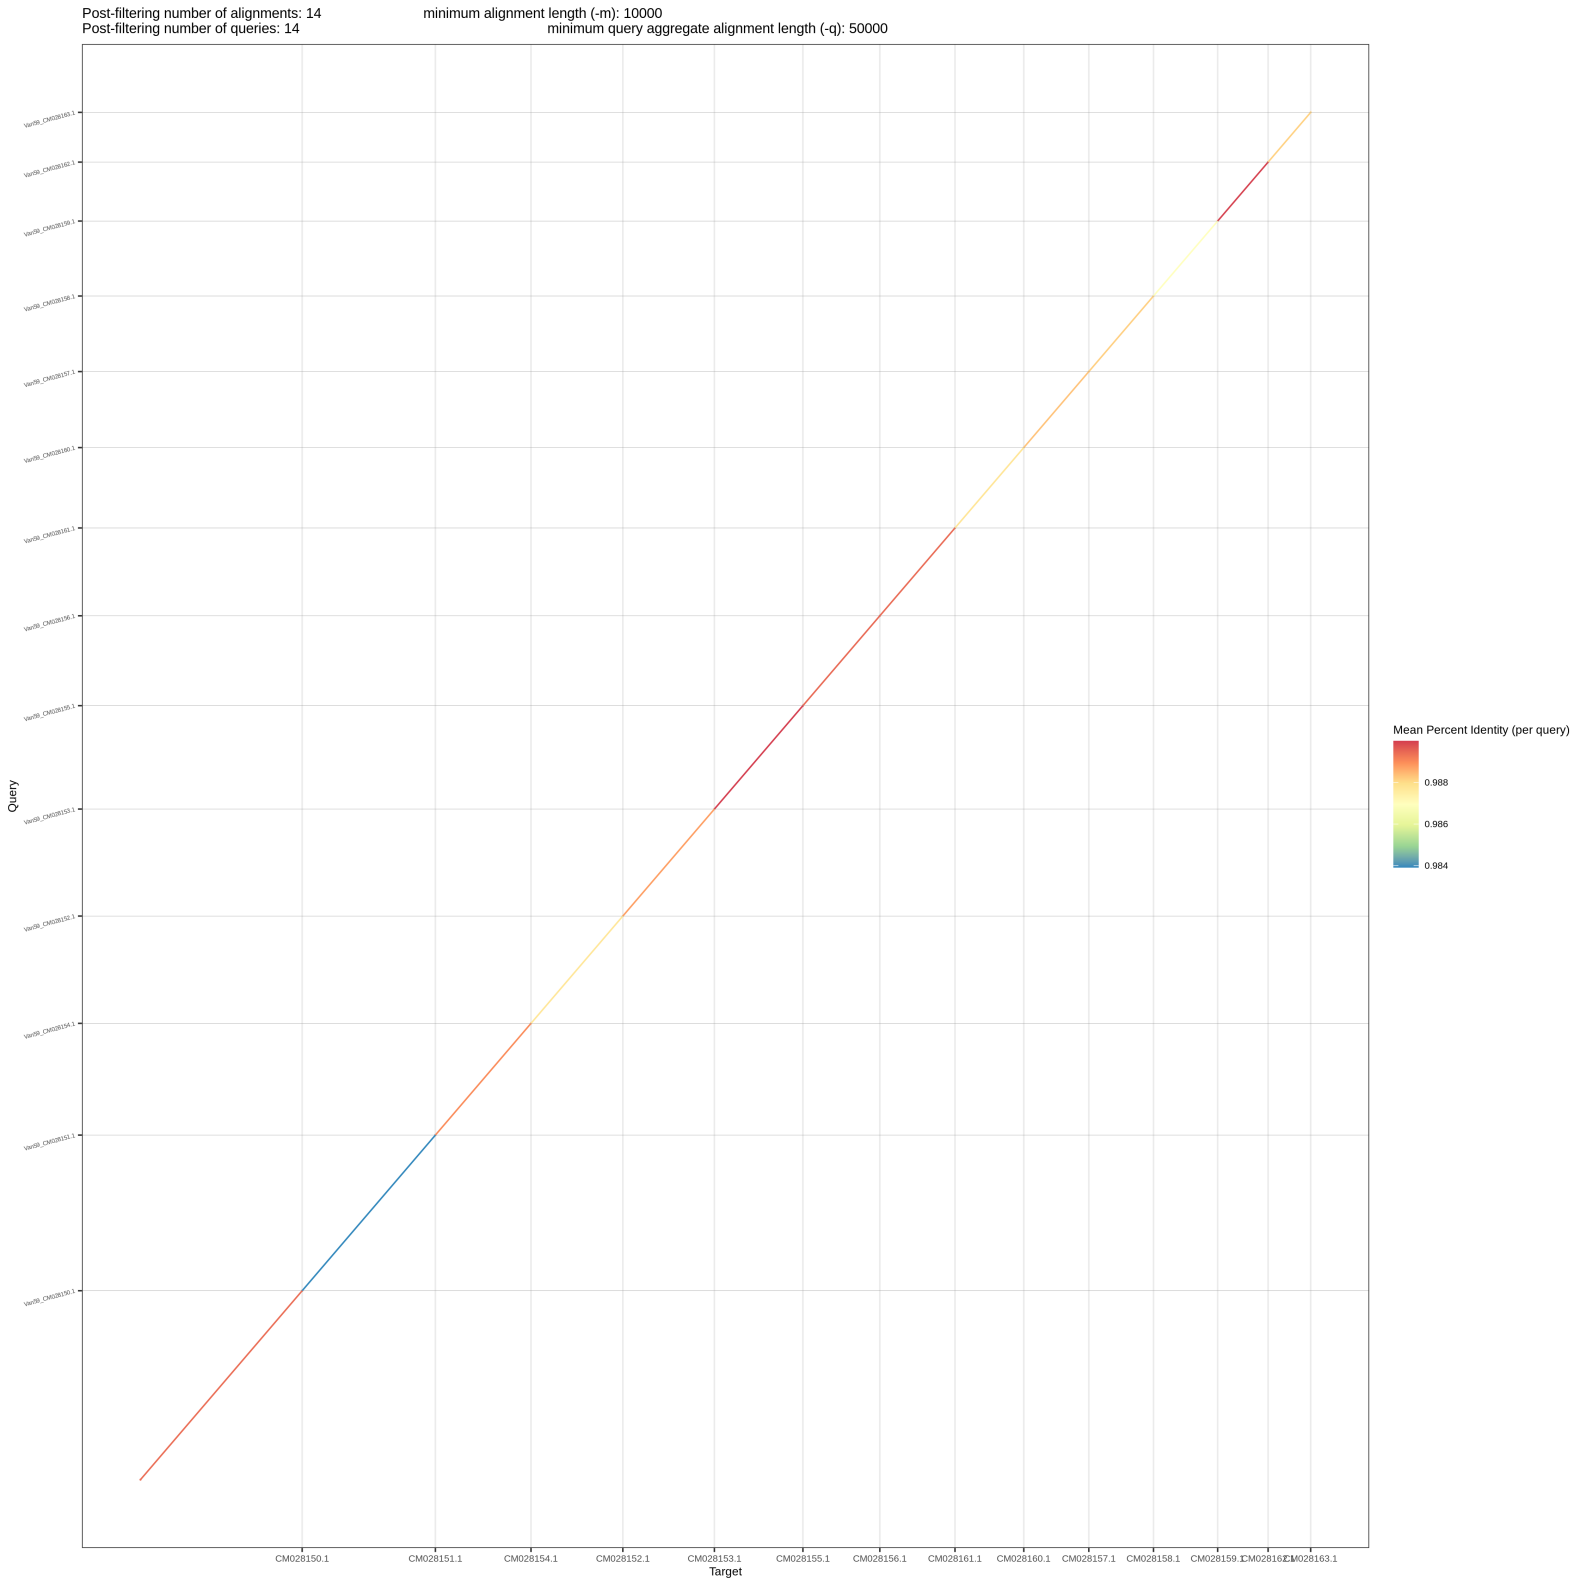

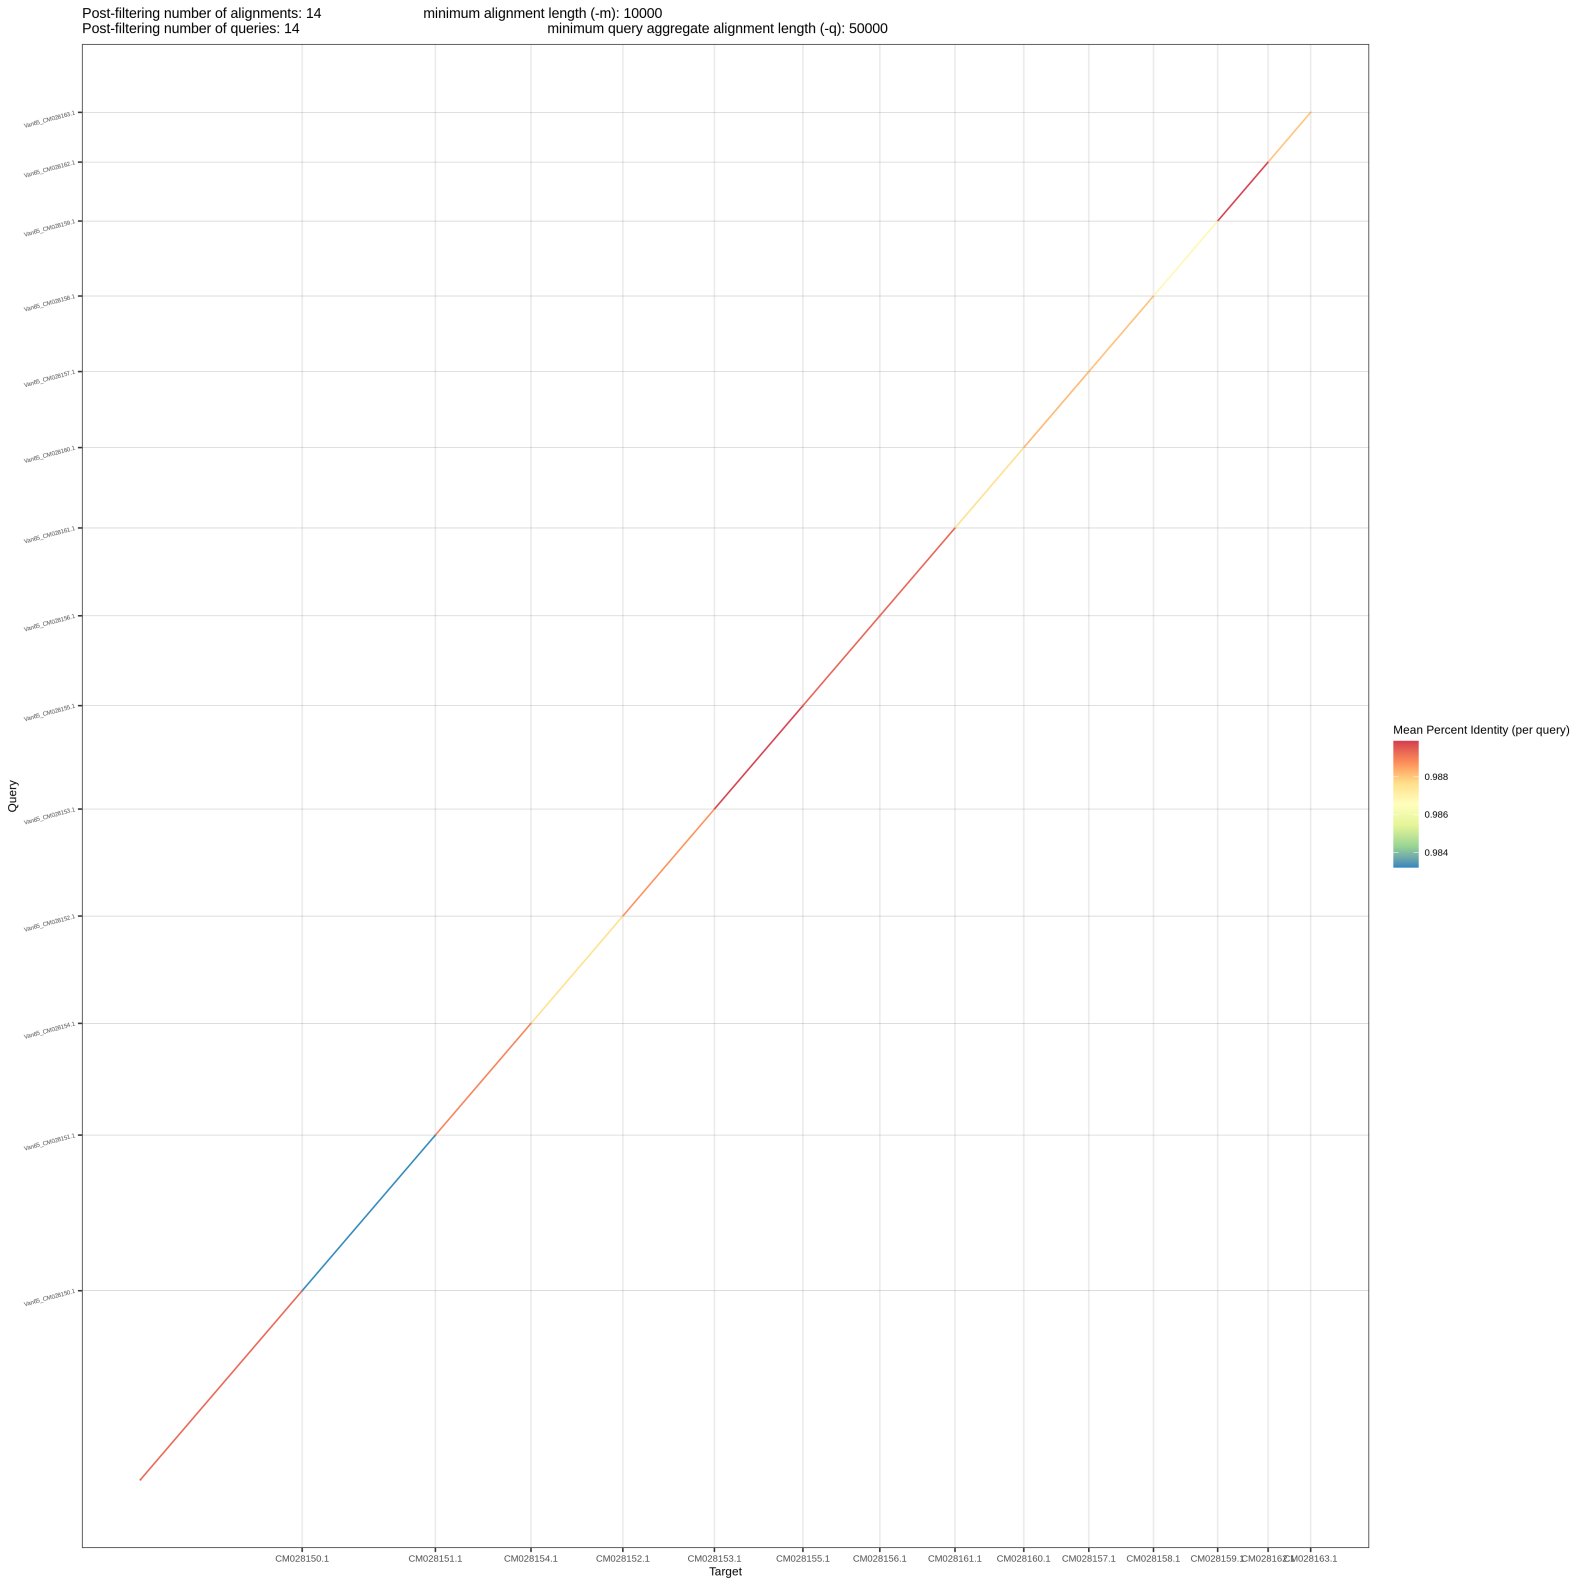

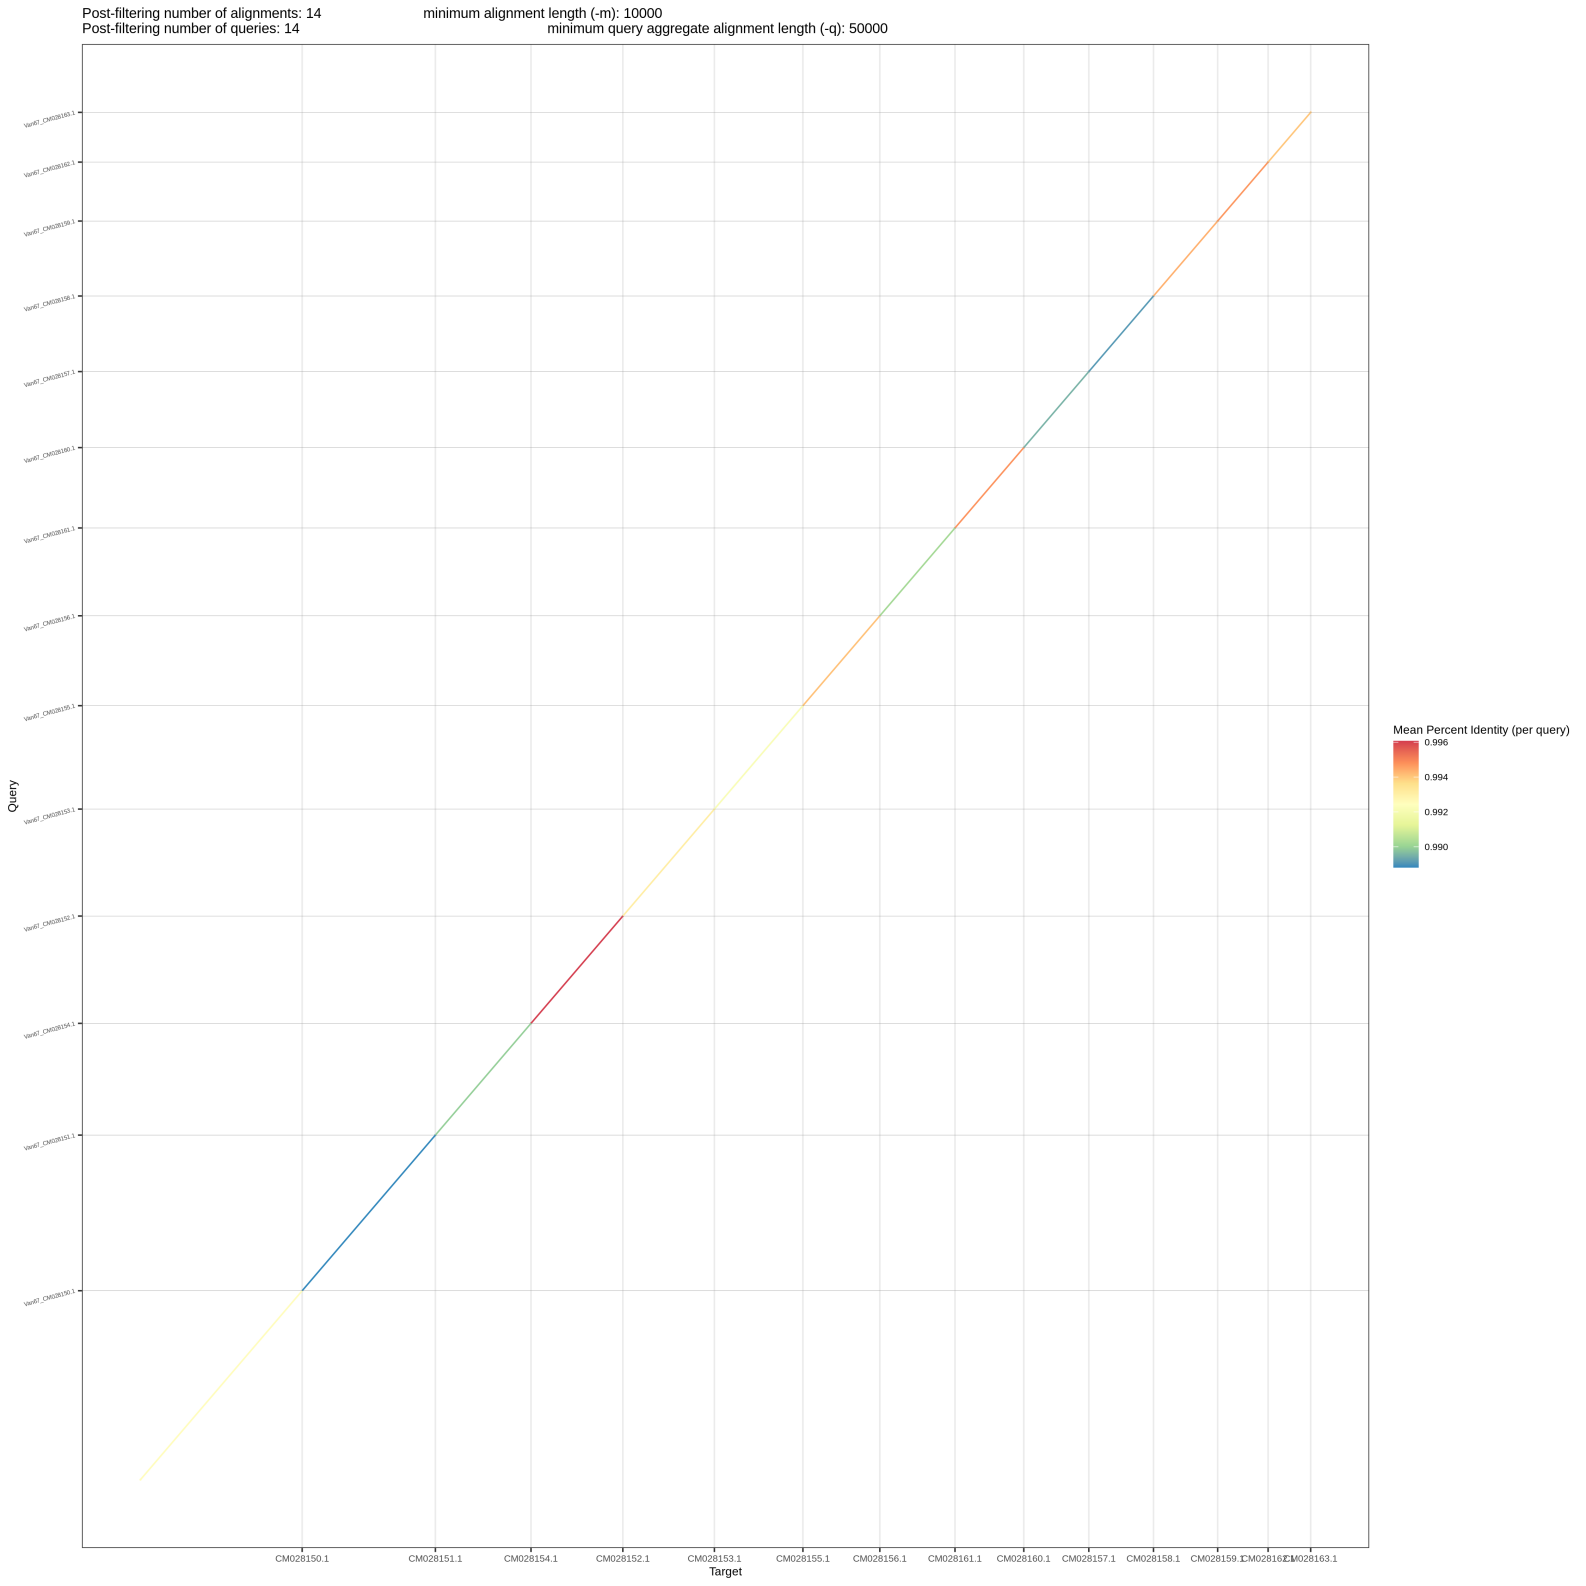

Supplement: s1 [file s1]
