# Supplementary figures and images for: Genomic Insights into Cultivated Mexican Vanilla planifolia Reveal High Levels of Heterozygosity Stemming from Hybridization
Source: MDPI journal article supplement (doi:10.3390/plants11162090), 2022-08-11

A.

LD threshold of 0.8 resulting in 419885 SNPs

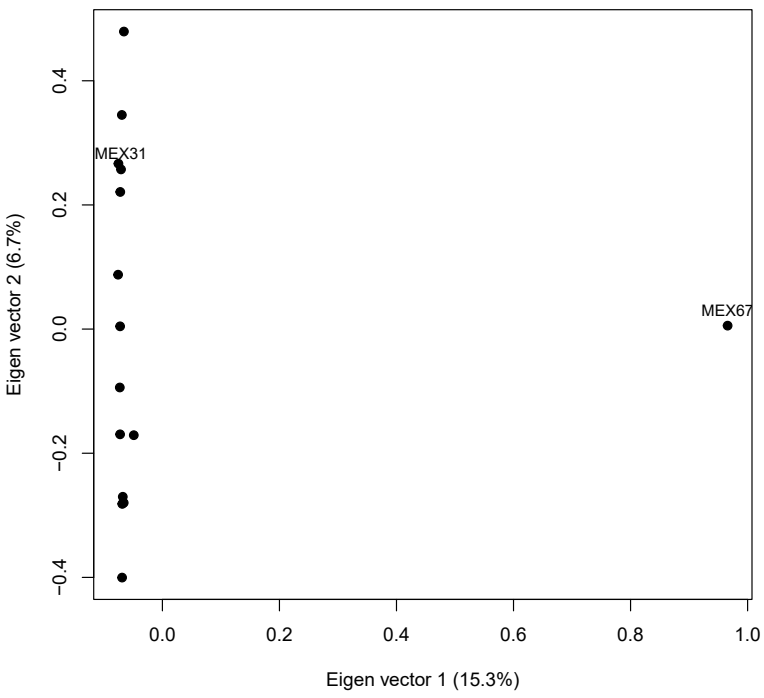

B.

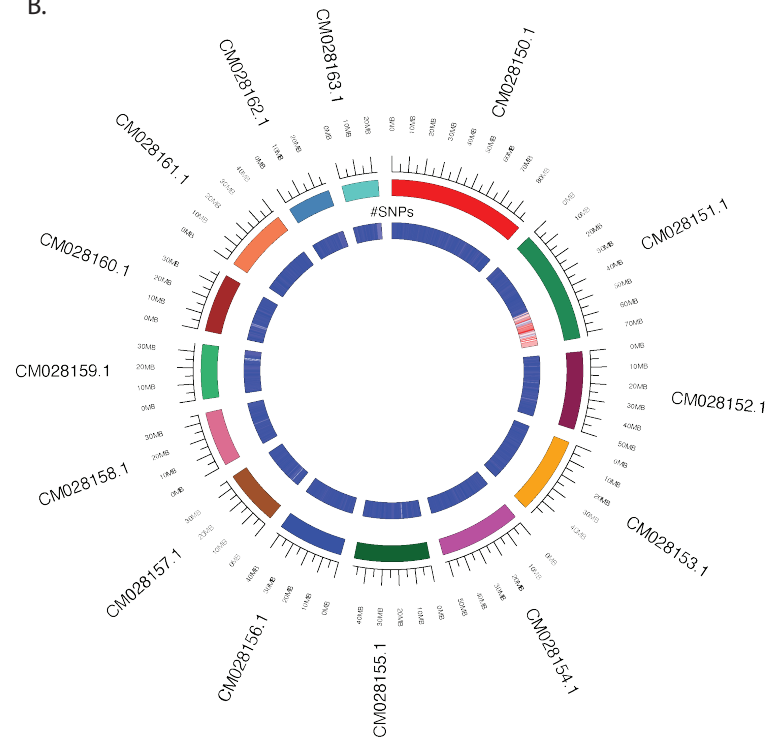

Supplement: s1 [file s1]
